# Supplementary material for: Evidence for an instructive mechanism of de novo methylation in cancer cells
Source: Springer Nature journal article supplement (doi:10.1038/ng1719), 2006-01-24

# CX36

## Lymphoblasts

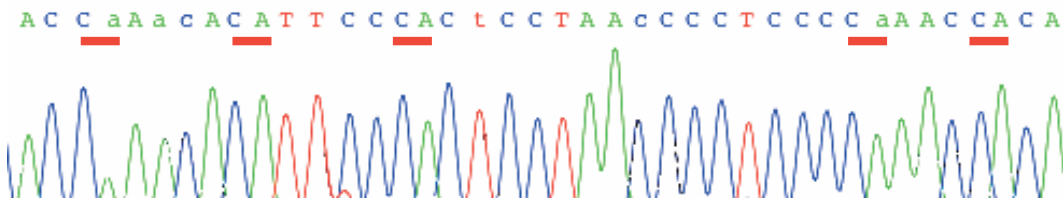

Supplement: 41588_2006_BFng1719_MOESM2_ESM.pdf [file 41588_2006_BFng1719_MOESM2_ESM.pdf]
