# Supplementary material for: Evidence for an instructive mechanism of de novo methylation in cancer cells
Source: Springer Nature journal article supplement (doi:10.1038/ng1719), 2006-01-24
Supplement: 41588_2006_BFng1719_MOESM3_ESM.pdf [file 41588_2006_BFng1719_MOESM3_ESM.pdf]

### Supplementary Table 1

#### Genes detected by mDIP previously reported to be hypermethylated in cancer.

| Gene name     | Locus link | Reference (Pubmed ID)                                                          |
|---------------|------------|--------------------------------------------------------------------------------|
| PENK          | 5179       | <a href="#">12000709</a>                                                       |
| ECRG4         | 84414      | <a href="#">12800218</a>                                                       |
| CRABP1        | 1381       | <a href="#">12640681</a>                                                       |
| HOXA11        | 3207       | <a href="#">12796396</a>                                                       |
| AKAP12        | 9590       | <a href="#">15258566</a>                                                       |
| TMEFF2 (HPP1) | 23671      | <a href="#">15342451</a> , <a href="#">12460892</a>                            |
| EDNRB         | 1910       | <a href="#">15569975</a> <a href="#">15129426</a> <a href="#">12499435</a> ... |
| PTPRO         | 5800       | <a href="#">14508512</a>                                                       |
| NNAT          | 4826       | <a href="#">11960906</a>                                                       |
| CYP24A1       | 1591       | <a href="#">12903199</a>                                                       |
| HTR1B         | 3351       | <a href="#">11709722</a>                                                       |
| NEF3          | 4741       | <a href="#">15467763</a>                                                       |
| CLDN5         | 7122       | <a href="#">12839967</a>                                                       |
| CFTR          | 1080       | <a href="#">15526362</a>                                                       |
| HLA-F         | 3134       | <a href="#">7683306</a>                                                        |
| GRM7          | 2917       | <a href="#">15059895</a>                                                       |
| UCHL1         | 7345       | <a href="#">12839967</a> , <a href="#">11448537</a>                            |
| SLIT2         | 9353       | <a href="#">15534609</a> , <a href="#">12881718</a> , <a href="#">12615722</a> |
| KDR           | 3791       | <a href="#">112824880</a>                                                      |

#### Genes detected by mDIP previously reported to be induced by 5-azaC treatment.

| Gene name     | Locus link | Reference (Pubmed ID)                                                          |
|---------------|------------|--------------------------------------------------------------------------------|
| KRT7          | 3855       | <a href="#">7533260</a>                                                        |
| HLA-F         | 3134       | <a href="#">7683306</a>                                                        |
| CRABP1        | 1381       | <a href="#">12640681</a>                                                       |
| NEF3          | 4741       | <a href="#">15467763</a>                                                       |
| TMEFF2 (HPP1) | 23671      | <a href="#">12460892</a>                                                       |
| EDNRB         | 1910       | <a href="#">12460892</a>                                                       |
| HLA-G         | 3135       | <a href="#">12552087</a>                                                       |
| COL1A1        | 1277       | <a href="#">15788405</a>                                                       |
| AQP5          | 362        | <a href="#">15640830</a>                                                       |
| CYP24A1       | 1591       | <a href="#">15860259</a>                                                       |
| GRM7          | 2917       | <a href="#">15059895</a>                                                       |
| UCHL1         | 7345       | <a href="#">12839967</a> , <a href="#">11448537</a>                            |
| SLIT2         | 9353       | <a href="#">15534609</a> , <a href="#">12881718</a> , <a href="#">12615722</a> |
| HLA-B         | 3106       | <a href="#">15604288</a> , <a href="#">12704681</a> , ...                      |
| CYP1B1        | 1545       | <a href="#">12927368</a>                                                       |
| DBC1          | 1620       | <a href="#">15746151</a>                                                       |
| MT1G          | 4495       | <a href="#">12640681</a>                                                       |
| CLDN5         | 7122       | <a href="#">12839967</a>                                                       |
| KDR           | 3791       | <a href="#">112824880</a>                                                      |
| FLNC          | 2318       | <a href="#">124382621</a>                                                      |
| TP73          | 7161       | <a href="#">15609309</a>                                                       |
| NNAT          | 4826       | <a href="#">11960906</a>                                                       |
| HTR1B         | 3351       | <a href="#">11709722</a>                                                       |

#### Genes upregulated (>2 fold) after 5-azaC treatment of PC3 cells as detected by expression profiling before and after treatment (current study).

| Gene name       | Ensembl Gene ID | Locus link |
|-----------------|-----------------|------------|
| AKR1B1          | ENSG00000085662 | 231        |
| FABP5           | ENSG00000164687 | 2171       |
| SAFB            | ENSG00000160633 | 6294       |
| ENSG00000073350 | ENSG00000073350 | 3993       |
| PTGS2           | ENSG00000073756 | 5743       |
| MAP3K14         | ENSG0000006062  | 9020       |
| HLA-F           | ENSG00000137403 | 3134       |
| NM_024061       | ENSG00000169996 | 79027      |
| HLA-B           | ENSG00000180202 | 3106       |
| IER3            | ENSG00000137331 | 8870       |
| EREG            | ENSG00000124882 | 2069       |
| ENSG00000137403 | ENSG00000137403 | 3134       |
