# Supplementary material for: Evidence for an instructive mechanism of de novo methylation in cancer cells
Source: Springer Nature journal article supplement (doi:10.1038/ng1719), 2006-01-24
Supplement: 41588_2006_BFng1719_MOESM4_ESM.pdf [file 41588_2006_BFng1719_MOESM4_ESM.pdf]

cytogenetic band  
from the genome  
browser June 2002

Location of the  
gene (based on  
the June 2002  
version of the  
138849172

| locus link<br>(release) | Version of the<br>138849172 | polp1        | polp2    | polp3        | polp4 vs normal<br>c | carcinoma1<br>1rep1 | carcinoma1<br>2rep2 | carcinoma2<br>catc0_2_rep1 | carcinoma2<br>catc0_2_rep2 | carcinoma2<br>vs normal | pc3_rep1<br>0.977335 | pc3_rep2<br>0.074187 | pc3_rep3<br>0.209813 | clusters |
|-------------------------|-----------------------------|--------------|----------|--------------|----------------------|---------------------|---------------------|----------------------------|----------------------------|-------------------------|----------------------|----------------------|----------------------|----------|
| 85021                   | 6q24.1                      | 0.2266153696 | 0.180059 | 0.0005784778 | 0.0003309567         | 0.702925605         | 5.83E-07            | 0.5113778                  | 0.97650007                 | 0.41621087              | 0.343662             | 0.4785               | 0.464886             | NO       |
| 2983                    | 4q32.1                      | 0.33831266   | 0.280536 | 0.465996     | 0.406605338          | 1.60E-05            | 0.867166412         | 0.68949797                 | 0.43195662                 | 0.94673108              | 0.945289             | 0.014479             | 0.357819             | NO       |
| 1478                    | Xq22.1                      | 0.11899194   | 0.598688 | 0.386587     | 0.000296781          | 0.999792406         | 0.999754616         | 0.51667937                 | 0.49379222                 | 0.24311944              | 0.55614514           | 0.334987             | 0.334987             | NO       |
| 1404                    | 5q14.3                      |              |          |              |                      | 0.616335761         | 0.51667937          | 0.49379222                 | 0.24311944                 | 0.55614514              | 0.334987             | 0.334987             | 0.334987             | NO       |
| 30812                   | 16p13.3                     |              |          |              |                      | 0.501898567         | 0.34434946          | 0.34957369                 | 0.79551646                 | 0.5666740043            | 0.847222             | 0.606645             | 0.318693             | NO       |
| 100                     | 20q13.12                    | 0.081170802  | 0.213534 | 0.24631      | 0.000433135          | 0.501898567         | 0.34434946          | 0.34957369                 | 0.79551646                 | 0.5666740043            | 0.847222             | 0.606645             | 0.318693             | NO       |
| 735                     | 4p14                        | 0.534606566  | 0.343336 | 0.24631      | 0.000433135          | 0.501898567         | 0.34434946          | 0.34957369                 | 0.79551646                 | 0.5666740043            | 0.847222             | 0.606645             | 0.318693             | NO       |
| 8213                    | Xp11.22                     | 0.08836217   | 0.122104 | 0.528717     | 0.438612224          | 0.350821925         | 0.294871722         | 0.1144882                  | 0.00026207                 | 0.125391509             | 0.464289             | 0.634007             | 0.367582             | NO       |
| 85004                   | 12p12.3                     | 0.000505851  | 0.338892 | 0.984512     | 0.615125208          | 0.350821925         | 0.294871722         | 0.1144882                  | 0.00026207                 | 0.125391509             | 0.464289             | 0.634007             | 0.367582             | NO       |
| 51545                   | 19q13.42                    | 0.000505851  | 0.338892 | 0.984512     | 0.615125208          | 0.350821925         | 0.294871722         | 0.1144882                  | 0.00026207                 | 0.125391509             | 0.464289             | 0.634007             | 0.367582             | NO       |
| 7216                    | Xp11.22                     | 0.438429836  | 0.172281 | 0.913847     | 0.415217101          | 0.615125208         | 0.294871722         | 0.1144882                  | 0.00026207                 | 0.125391509             | 0.464289             | 0.634007             | 0.367582             | NO       |
| 23127                   | 16p25.3                     | 0.563818444  | 0.738962 | 0.720743     | 0.000843514          | 0.615125208         | 0.294871722         | 0.1144882                  | 0.00026207                 | 0.125391509             | 0.464289             | 0.634007             | 0.367582             | NO       |
| 84911                   | 19q13.12                    | 0.280896     | 0.190714 | 0.072136     | 0.615907827          | 0.662939942         | 0.34906581          | 0.38819788                 | 0.0009281                  | 0.734936                | 0.1012311            | 0.048974             | 0.684012             | NO       |
| 571                     | 21q21.3                     | 0.840005645  | 0.715098 | 0.190714     | 0.300879347          | 0.000995936         | 0.34906581          | 0.38819788                 | 0.0009281                  | 0.734936                | 0.1012311            | 0.048974             | 0.684012             | NO       |
| 761                     | 8q21.2                      | 0.0644972038 | 0.152465 | 0.686242     | 0.427933926          | 0.000424033         | 0.52065982          | 0.35970706                 | 0.04440549                 | 0.722859202             | 0.072774             | 0.284451             | 0.704212             | NO       |
| 8418                    | 5q31.3                      | 0.1929256714 | 0.09717  | 0.876931     | 0.466974781          | 0.000514517         | 0.22537618          | 0.39682561                 | 0.43945809                 | 0.682088174             | 0.517725             | 0.792664             | 0.600835             | NO       |
| 50945                   | Xq21.1                      | 0.245368     | 0.978601 | 0.000357396  | 0.00144144           | 0.91960404          | 0.97013219          | 0.2439881                  | 0.99245331                 | 0.947334                | 0.12373              | 0.970496             | NO                   |          |
| 2752                    | 16q25.3                     | 0.288190444  | 0.102981 | 0.171557     | 0.469188273          | 2.06E-09            | 0.4202098           | 0.22103717                 | 0.70765697                 | 0.551772958             | 0.845638             | 0.935114             | 0.51292              | NO       |
| 5884                    | 5q13.2                      |              |          |              |                      | 9.93E-10            |                     |                            |                            |                         |                      |                      |                      | NO       |
| 10699                   | 4q12                        | 0.000286352  | 0.553131 | 0.793743     | 0.698714998          | 0.51932589          | 0.86572221          | 0.38079122                 | 0.86572221                 | 0.701282889             | 0.236355             | 0.408107             | 0.502677             | NO       |
| 5495                    | 16p13.3                     | 0.207505135  | 0.202613 | 0.484494     | 0.000581622          | 0.722438398         | 0.6572221           | 0.38079122                 | 0.86572221                 | 0.701282889             | 0.236355             | 0.408107             | 0.502677             | NO       |
| 4914                    | 16q23.1                     | 0.08829367   | 0.202613 | 0.484494     | 0.453684612          | 0.456093953         | 0.01973099          | 0.45914801                 | 0.88669766                 | 0.000976078             | 0.991897             | 0.049677             | 0.463652             | NO       |
| 1121                    | 12q24.33                    | 0.279418645  | 0.047989 | 0.35843      | 0.000136281          | 0.466949719         | 0.01973099          | 0.33902567                 | 0.28288429                 | 0.303884599             | 0.630334             | 0.952458             | 0.227394             | NO       |
| 55168                   | 6p21.1                      | 0.350182314  | 0.14271  | 3.15E-05     | 0.627466557          | 0.466949719         | 0.01973099          | 0.33902567                 | 0.28288429                 | 0.303884599             | 0.077799             | 0.430408             | 0.551675             | NO       |
| 3421                    | Xq28                        | 0.000933147  | 0.105625 | 0.290213     | 0.428572505          | 0.658903465         | 0.5214238           | 0.89640173                 | 0.44346181                 | 0.575698368             | 0.561438             | 0.652809             | 0.652809             | NO       |
| 55290                   | 8p12                        | 0.000933147  | 0.105625 | 0.290213     | 0.428572505          | 0.237656692         | 0.12505684          | 0.99206031                 | 0.69406812                 | 0.966506231             | 0.561438             | 0.652809             | 0.652809             | NO       |
| 80742                   | 6p21.33                     | 0.167214636  | 0.569707 | 0.52046      | 0.586415306          | 0.41647928          | 0.45251796          | 0.50701132                 | 0.37975742                 | 0.53486781              | 0.000102             | 0.663377             | 0.729163             | NO       |
| 3304                    | #N/A                        | 0.00265393   | 0.108514 | 0.425372     | 0.525299182          | 0.47167272          | 0.468106            | 0.99710136                 | 0.41051897                 | 0.8343064133            | 0.55362              | 0.529892             | 0.349231             | NO       |
| 55119                   | 1p13.3                      | 0.279963123  | 0.489769 | 0.561285     | 0.40110896           | 0.25665593          | 0.28569592          | 0.88367685                 | 0.88367685                 | 0.843446553             | 0.170222             | 0.479848             | 0.001145             | NO       |
| 6755                    | 16p13.3                     | 0.610709963  | 0.411545 | 2.08E-06     | 0.45198954           | 0.74191773          | 0.00096702          | 0.64039663                 | 0.74231273                 | 0.340378478             | 0.957157             | 0.992669             | 0.291479             | NO       |
| 54991                   | 19q13.43                    | 0.10524025   | 0.117969 | 0.523408     | 0.000649044          | 0.45848798          | 0.33416757          | 0.16745171                 | 0.85343364                 | 0.018537477             | 0.880163             | 0.956944             | 0.655663             | NO       |
| 80305                   | 22q13.33                    |              |          |              |                      | 0.000440032         |                     |                            |                            |                         |                      |                      |                      | NO       |
| 4313                    | 16q12.2                     | 0.339423122  | 0.349555 | 0.828369     | 0.31171837           | 0.000152968         | 0.44905262          | 0.589374967                | 0.82955559                 | 0.327352077             | 0.499091             | 0.399326             | 0.43567              | NO       |
| 23014                   | 12q24.22                    | 0.27962448   | 0.250689 | 0.279275     | 0.269702153          | 0.00152968          | 0.44905262          | 0.589374967                | 0.82955559                 | 0.327352077             | 0.499091             | 0.399326             | 0.43567              | NO       |
| 1455                    | 19p13.3                     | 0.000810337  | 0.007608 | 0.300475     | 0.434400989          | 4.19E-05            | 0.87623634          | 0.53417658                 | 0.17787295                 | 0.262061839             | 0.871987             | 0.989845             | 0.656894             | NO       |
| 84263                   | 9q32                        | 0.10639575   | 0.060273 | 0.609477     | 0.366422751          | 0.4818964723        | 0.1598141           | 0.13796717                 | 0.88506407                 | 0.4267976               | 0.85541              | 0.989464             | 0.950682             | NO       |
| 54407                   | 12q13.11                    |              |          |              |                      | 0.881099457         | 0.55421688          | 0.28273956                 | 0.78823609                 | 0.436595073             | 0.956401             | 0.675244             | 0.215203             | NO       |
| 659                     | 2q33.1                      | 0.075467     | 0.147169 | 0.256494737  | 0.000898139          | 4.38E-05            | 0.59256259          | 0.52031346                 | 0.68968705                 | 0.00033053              | 0.296422             | 0.649496             | 0.347469             | NO       |
| 5558                    | Xq28                        | 0.76127292   | 0.397053 | 0.147169     | 0.000898139          | 0.448999461         | 0.56759882          | 0.68968705                 | 0.34660255                 | 0.003383053             | 0.453634             | 0.423754             | 0.423754             | NO       |
| 29966                   | 14q12                       | 0.682857286  | 0.961843 | 7.41E-05     | 0.390016785          | 0.815248976         | 0.14237815          | 0.11446049                 | 0.86068556                 | 0.221306835             | 0.998398             | 0.999326             | 0.991075             | NO       |
| 56163                   | 19q12.12                    | 0.742020869  | 0.936679 | 0.000956     | 0.61420461           | 0.177915146         | 0.30636128          | 0.86611656                 | 0.14441697                 | 0.862708585             | 0.867416             | 0.573594             | 0.715209             | NO       |
| 8548                    | 16q24.2                     | 0.229046673  | 0.223703 | 0.815879     | 0.536088947          | 5.41E-05            | 0.24954899          | 0.32640657                 | 0.70576056                 | 0.533785618             | 0.725824             | 0.627087             | 0.263554             | NO       |
| 80775                   | 2q14.2                      | 0.015843178  | 0.340157 | 0.634104714  | 0.578724649          | 0.982925548         | 0.00038173          | 0.27696154                 | 0.97453248                 | 0.391875168             | 0.813578             | 0.321966             | 0.731254             | NO       |
| 9519                    | 6q23.2                      | 0.339915852  | 0.183696 | 0.626658     | 0.578724649          | 0.547932853         | 0.10093605          | 0.27751916                 | 0.78768927                 | 0.234888055             | 0.503382             | 0.709165             | 0.059928             | NO       |
| 55342                   | 19p13.2                     | 0.4534865013 | 0.425532 | 0.45324      | 0.691867889          | 0.348286999         | 0.53058808          | 0.20284811                 | 0.29074305                 | 0.429289653             | 0.457136             | 0.345868             | 0.194503             | NO       |
| 2318                    | 7q32.1                      | 0.195947653  | 0.774696 | 0.128057     | 0.033755341          | 0.73253206          | 3.30E-06            | 0.39050158                 | 0.48670468                 | 0.003383053             | 0.159584             | 0.000872             | 0.000872             | NO       |
| 2908                    | 11q24.3                     |              |          |              |                      | 1.65E-05            |                     |                            |                            |                         |                      |                      |                      | NO       |
| 2904                    | 12p13.1                     | 0.342779826  | 0.984603 | 0.485854     | 0.376706541          | 0.454337017         | 0.00079647          | 0.38927383                 | 0.17856361                 | 0.081934055             | 0.8977907            | 0.88294              | 0.244834             | NO       |
| 9215                    | 22q12.3                     | 0.471692062  | 0.737538 | 0.457804     | 0.218916186          | 0.938625541         | 3.98E-05            | 0.6567819                  | 0.86367819                 | 0.315509944             | 0.931507             | 0.146953             | 0.599272             | NO       |
| 56953                   | 17p11.2                     |              |          |              |                      | 3.98E-05            |                     |                            |                            |                         |                      |                      |                      | NO       |
| 3299                    | 16q22.1                     | 0.735110922  | 0.724099 | 0.278469     | 0.0003756193         | 0.00059313          | 0.52212196          | 0.33601758                 | 0.00059313                 | 0.352207565             | 0.901758             | 0.585349             | 0.115909             | NO       |
| 23704                   | 2q36.1                      | 0.234554155  | 0.308263 | 0.317078     | 0.773811408          | 1.37E-07            | 0.52212196          | 0.33601758                 | 0.00059313                 | 0.352207565             | 0.901758             | 0.585349             | 0.115909             | NO       |
| 10617                   | 2p13.1                      | 0.574464735  | 0.724991 | 0.710708     | 0.487616728          | 0.117262038         | 0.70664877          | 0.05697669                 | 0.68900036                 | 0.624255138             | 0.579708             | 0.739506             | 0.467526             | NO       |
| 55163                   | 12q21.32                    | 0.1234361    | 0.24991  | 0.371302     | 0.273712338          | 0.000414318         | 0.58095917          | 0.16134764                 | 0.3169712                  | 0.424598444             | 0.487616728          | 0.601121             | 0.487616728          | NO       |
| 9953                    | 17p12                       | 0.710274527  | 0.989502 | 0.241992     | 0.242488452          | 0.999629276         | 0.00084657          | 0.102111588                | 0.91387418                 | 0.000942644             | 0.622697709          | 0.545493             | 0.29773              | NO       |
| 84216                   | 16q12                       |              |          |              |                      | 5.57E-11            |                     |                            |                            |                         | 0.622697709          | 0.545493             | 0.29773              | NO       |
| 7042                    | 16q1                        | 0.173609099  | 0.44394  | 0.175579     | 0.0003756193         | 0.864192135         | 0.11429987          | 0.12450249                 | 0.95857196                 | 0.352207565             | 0.901758             | 0.585349             | 0.115909             | NO       |
| 79083                   | 2q37.3                      | 0.2770771    | 0.00096  |              |                      |                     |                     |                            |                            |                         |                      |                      |                      |          |
