# Supplementary material for: Evidence for an instructive mechanism of de novo methylation in cancer cells
Source: Springer Nature journal article supplement (doi:10.1038/ng1719), 2006-01-24
Supplement: 41588_2006_BFng1719_MOESM5_ESM.pdf [file 41588_2006_BFng1719_MOESM5_ESM.pdf]

The table includes all the genes that are part of the enriched categories shown in table 1 and were significantly methylated at least in one tumor type.

|                            | Gene name      | caco-2 | pc3 | tumors | locus_link             | description                                                                                         |
|----------------------------|----------------|--------|-----|--------|------------------------|-----------------------------------------------------------------------------------------------------|
| <b>cell adhesion</b>       |                |        |     |        |                        |                                                                                                     |
| homophilic cell adhesion   | <i>PCDHGC3</i> | +      | +   | -      | <a href="#">5098</a>   | protocadherin gamma subfamily C, 3                                                                  |
|                            | <i>PCDHGC4</i> | +      | -   | +      | <a href="#">56098</a>  | protocadherin gamma subfamily C, 4                                                                  |
|                            | <i>PCDHGB7</i> | +      | +/- | +      | <a href="#">56099</a>  | protocadherin gamma subfamily B, 7                                                                  |
|                            | <i>PCDHGB5</i> | +      | +   | +      | <a href="#">56101</a>  | protocadherin gamma subfamily B, 5                                                                  |
|                            | <i>PCDHGA7</i> | +      | +/- | +      | <a href="#">56108</a>  | protocadherin gamma subfamily A, 7                                                                  |
|                            | <i>PCDHAC2</i> | +      | +   | +      | <a href="#">56134</a>  | protocadherin alpha subfamily C, 2                                                                  |
|                            | <i>PCDHAC1</i> | +      | +   | +      | <a href="#">56135</a>  | protocadherin alpha subfamily C, 1                                                                  |
|                            | <i>PCDH10</i>  | +      | -   | +      | <a href="#">57575</a>  | protocadherin 10                                                                                    |
|                            | <i>PCDHGB6</i> | +/-    | +   | +      | <a href="#">56100</a>  | protocadherin gamma subfamily B, 6                                                                  |
|                            | <i>PCDHA10</i> | +/-    | +   | +      | <a href="#">56139</a>  | protocadherin alpha 10                                                                              |
|                            | <i>PCDH17</i>  | +/-    | -   | +      | <a href="#">27253</a>  | protocadherin 17                                                                                    |
|                            | <i>PCDH11X</i> | -      | -   | +      | <a href="#">27328</a>  | protocadherin 11 X-linked                                                                           |
|                            | <i>PCDHA8</i>  | +/-    | +/- | +      | <a href="#">56140</a>  | protocadherin alpha 8                                                                               |
|                            | <i>PCDHGB4</i> | +/-    | +/- | +      | <a href="#">8641</a>   | protocadherin gamma subfamily B, 4                                                                  |
| others                     | <i>CHL1</i>    | +      | +/- | +      | <a href="#">10752</a>  | cell adhesion molecule with homology to L1CAM (close homolog of L1)                                 |
|                            | <i>caspr5</i>  | +      | +   | +      | <a href="#">129684</a> | caspr5 protein                                                                                      |
|                            | <i>NID2</i>    | +      | +   | +      | <a href="#">22795</a>  | nidogen 2 (osteonidogen)                                                                            |
|                            | <i>SLIT2</i>   | +/-    | -   | +      | <a href="#">9353</a>   | slit homolog 2 (Drosophila)                                                                         |
|                            | <i>COMP</i>    | -      | +/- | +      | <a href="#">1311</a>   | cartilage oligomeric matrix protein                                                                 |
|                            | <i>SRPX</i>    | -      | -   | +      | <a href="#">8406</a>   | sushi-repeat-containing protein, X-linked                                                           |
|                            | <i>CLDN1</i>   | -      | -   | +      | <a href="#">9076</a>   | claudin 1                                                                                           |
| <b>cell-cell signaling</b> |                |        |     |        |                        |                                                                                                     |
| synaptic transmission      | <i>CHAT</i>    | +      | +   | -      | <a href="#">1103</a>   | choline acetyltransferase                                                                           |
|                            | <i>GALR1</i>   | +      | +   | +      | <a href="#">2587</a>   | galanin receptor 1                                                                                  |
|                            | <i>AMPH</i>    | +      | -   | +      | <a href="#">273</a>    | amphiphysin (Stiff-Man syndrome with breast cancer 128kDa autoantigen)                              |
|                            | <i>GRIA4</i>   | +      | +   | +      | <a href="#">2893</a>   | glutamate receptor, ionotropic, AMPA 4                                                              |
|                            | <i>GRIK2</i>   | +      | +   | +      | <a href="#">2898</a>   | glutamate receptor, ionotropic, kainate 2                                                           |
|                            | <i>TRH</i>     | +      | -   | +      | <a href="#">6530</a>   | thyrotropin-releasing hormone                                                                       |
|                            | <i>CACNA1E</i> | +      | -   | +      | <a href="#">777</a>    | calcium channel, voltage-dependent, alpha 1E subunit                                                |
|                            | <i>CART</i>    | +      | +   | +      | <a href="#">9607</a>   | cocaine- and amphetamine-regulated transcript                                                       |
|                            | <i>GABRB2</i>  | -      | +   | -      | <a href="#">2561</a>   | gamma-aminobutyric acid (GABA) A receptor, beta 2                                                   |
|                            | <i>HTR1B</i>   | +/-    | +   | +      | <a href="#">3351</a>   | 5-hydroxytryptamine (serotonin) receptor 1B                                                         |
|                            | <i>GRM1</i>    | +      | -   | -      | <a href="#">2911</a>   | glutamate receptor, metabotropic 1                                                                  |
|                            | <i>MTNR1B</i>  | +      | +   | +      | <a href="#">4544</a>   | melatonin receptor 1B                                                                               |
|                            | <i>NPY</i>     | +      | +   | -      | <a href="#">4852</a>   | neuropeptide Y                                                                                      |
|                            | <i>KCNA1</i>   | +      | -   | -      | <a href="#">3736</a>   | potassium voltage-gated channel, shaker-related subfamily, member 1 (episodic ataxia with myokymia) |
|                            | <i>NOS1</i>    | -      | -   | +      | <a href="#">4842</a>   | nitric oxide synthase 1 (neuronal)                                                                  |
|                            | <i>DRD1P</i>   | -      | -   | +      | <a href="#">50632</a>  | dopamine receptor D1 interacting protein                                                            |
|                            | <i>ADRA1A</i>  | +      | +/- | +      | <a href="#">148</a>    | adrenergic, alpha-1A-, receptor                                                                     |
|                            | <i>GAD2</i>    | +/-    | +/- | +      | <a href="#">2572</a>   | glutamate decarboxylase 2 (pancreatic islets and brain, 65kDa)                                      |
|                            | <i>GPR7</i>    | +      | +/- | +      | <a href="#">2831</a>   | G protein-coupled receptor 7                                                                        |
|                            | <i>GRIK1</i>   | -      | -   | +      | <a href="#">2897</a>   | glutamate receptor, ionotropic, kainate 1                                                           |
|                            | <i>FGF5</i>    | +      | -   | +      | <a href="#">2250</a>   | fibroblast growth factor 5                                                                          |
| others                     | <i>TRHDE</i>   | +      | +   | +      | <a href="#">29953</a>  | thyrotropin-releasing hormone degrading ectoenzyme                                                  |
|                            | <i>PENK</i>    | +      | +/- | +      | <a href="#">5179</a>   | proenkephalin                                                                                       |
|                            | <i>CXCL14</i>  | +      | +/- | +      | <a href="#">9547</a>   | chemokine (C-X-C motif) ligand 14                                                                   |
|                            | <i>TRH</i>     | +      | +   | +      | <a href="#">7200</a>   | thyrotropin-releasing hormone                                                                       |
|                            | <i>WNT5A</i>   | +/-    | +   | -      | <a href="#">7474</a>   | wingless-type MMTV integration site family, member 5A                                               |
| <b>signal transduction</b> |                |        |     |        |                        |                                                                                                     |
| G-protein coupled receptor | <i>CRHR2</i>   | +      | +   | +      | <a href="#">1395</a>   | corticotropin releasing hormone receptor 2                                                          |
| protein signaling pathways | <i>ADRA1A</i>  | +      | -   | +      | <a href="#">148</a>    | adrenergic, alpha-1A-, receptor                                                                     |
|                            | <i>EDNRB</i>   | +      | +   | +      | <a href="#">1910</a>   | endothelin receptor type B                                                                          |
|                            | <i>GALR1</i>   | +      | +   | +      | <a href="#">2587</a>   | galanin receptor 1                                                                                  |

|               |         |     |     |   |                       |                                                                                                                 |
|---------------|---------|-----|-----|---|-----------------------|-----------------------------------------------------------------------------------------------------------------|
|               | GHSR    | +   | +   | + | <a href="#">2693</a>  | growth hormone secretagogue receptor                                                                            |
|               | GPR6    | +   | +   | - | <a href="#">2830</a>  | G protein-coupled receptor 6                                                                                    |
|               | GPR10   | +   | +/- | + | <a href="#">2834</a>  | G protein-coupled receptor 10                                                                                   |
|               | GRM6    | +   | -   | - | <a href="#">2916</a>  | glutamate receptor, metabotropic 6                                                                              |
|               | HTR1A   | +   | +/- | + | <a href="#">3350</a>  | 5-hydroxytryptamine (serotonin) receptor 1A                                                                     |
|               | SALPR   | +   | +/- | - | <a href="#">51289</a> | G-protein coupled receptor SALPR; somatostatin and angiotensin-like peptide receptor                            |
|               | PENK    | +   | -   | + | <a href="#">5179</a>  | proenkephalin                                                                                                   |
|               | EDG8    | +   | +   | + | <a href="#">53637</a> | endothelial differentiation, sphingolipid G-protein-coupled receptor, 8                                         |
|               | EDG6    | +   | +/- | + | <a href="#">8698</a>  | endothelial differentiation, G-protein-coupled receptor 6                                                       |
|               | AKAP12  | +   | -   | - | <a href="#">9590</a>  | A kinase (PRKA) anchor protein (gravin) 12                                                                      |
|               | CART    | +   | +   | + | <a href="#">9607</a>  | cocaine- and amphetamine-regulated transcript                                                                   |
|               | GPR72   | -   | +   | + | <a href="#">10888</a> | G protein-coupled receptor 72                                                                                   |
|               | GABRB2  | -   | +   | - | <a href="#">2561</a>  | gamma-aminobutyric acid (GABA) A receptor, beta 2                                                               |
|               | HTR1B   | +/- | +   | + | <a href="#">3351</a>  | 5-hydroxytryptamine (serotonin) receptor 1B                                                                     |
|               | HTR5A   | -   | +   | + | <a href="#">3361</a>  | 5-hydroxytryptamine (serotonin) receptor 5A                                                                     |
|               | MTNR1B  | +/- | +   | + | <a href="#">4544</a>  | melatonin receptor 1B                                                                                           |
|               | NPY     | +   | +   | - | <a href="#">4852</a>  | neuropeptide Y                                                                                                  |
|               | PTGFR   | -   | +   | + | <a href="#">5737</a>  | prostaglandin F receptor (FP)                                                                                   |
|               | GNA14   | -   | +   | - | <a href="#">9630</a>  | guanine nucleotide binding protein (G protein), alpha 14                                                        |
|               | OPRM1   | -   | -   | + | <a href="#">4988</a>  | opioid receptor, mu 1                                                                                           |
|               | RASGRP2 | +   | -   | - | <a href="#">10235</a> | RAS guanyl releasing protein 2 (calcium and DAG-regulated)                                                      |
|               | GPR7    | +   | +/- | + | <a href="#">2831</a>  | G protein-coupled receptor 7                                                                                    |
|               | DRD11P  | -   | -   | + | <a href="#">50632</a> | dopamine receptor D1 interacting protein                                                                        |
|               | PTHr2   | +/- | -   | + | <a href="#">5746</a>  | parathyroid hormone receptor 2                                                                                  |
|               | ELTD1   | -   | +/- | + | <a href="#">64123</a> | EGF, latrophilin and seven transmembrane domain containing 1                                                    |
|               | TACR3   | +/- | -   | + | <a href="#">6870</a>  | tachykinin receptor 3                                                                                           |
|               | FZD9    | -   | -   | + | <a href="#">8326</a>  | frizzled homolog 9 (Drosophila)                                                                                 |
|               | GPR101  | -   | -   | + | <a href="#">83550</a> | G protein-coupled receptor 101                                                                                  |
| others        | CHL1    | +   | +/- | + | <a href="#">10752</a> | cell adhesion molecule with homology to L1CAM (close homolog of L1)                                             |
|               | MAP4K1  | +   | -   | + | <a href="#">11184</a> | mitogen-activated protein kinase kinase kinase 1                                                                |
|               | CRABP1  | +   | +   | - | <a href="#">1381</a>  | cellular retinoic acid binding protein 1                                                                        |
|               | FGF5    | +   | -   | + | <a href="#">2250</a>  | fibroblast growth factor 5                                                                                      |
|               | SHANK2  | +   | -   | + | <a href="#">22941</a> | SH3 and multiple ankyrin repeat domains 2                                                                       |
|               | GDNF    | +   | +   | + | <a href="#">2668</a>  | glial cell derived neurotrophic factor                                                                          |
|               | GRIA4   | +   | +   | + | <a href="#">2893</a>  | glutamate receptor, ionotropic, AMPA 4                                                                          |
|               | GRIK2   | +   | +   | + | <a href="#">2898</a>  | glutamate receptor, ionotropic, kainate 2                                                                       |
|               | TRHDE   | +   | +   | + | <a href="#">29953</a> | thyrotropin-releasing hormone degrading ectoenzyme                                                              |
|               | HCK     | +   | +   | + | <a href="#">3055</a>  | hemopoietic cell kinase                                                                                         |
|               | APBB1IP | +   | -   | + | <a href="#">54518</a> | amyloid beta (A4) precursor protein-binding, family B, member 1 interacting protein                             |
|               | SH3GL3  | +   | -   | + | <a href="#">6457</a>  | SH3-domain GRB2-like 3                                                                                          |
|               | TRH     | +   | +   | + | <a href="#">7200</a>  | thyrotropin-releasing hormone                                                                                   |
|               | RAB34   | +   | -   | - | <a href="#">83871</a> | RAB34, member RAS oncogene family                                                                               |
|               | PPP1R1B | +   | -   | - | <a href="#">84152</a> | protein phosphatase 1, regulatory (inhibitor) subunit 1B (dopamine and cAMP regulated phosphoprotein, DARPP-32) |
|               | OSMR    | +   | -   | + | <a href="#">9180</a>  | oncostatin M receptor                                                                                           |
|               | CD8A    | +   | +/- | - | <a href="#">925</a>   | CD8 antigen, alpha polypeptide (p32)                                                                            |
|               | CXCL14  | +   | +/- | + | <a href="#">9547</a>  | chemokine (C-X-C motif) ligand 14                                                                               |
|               | TNFRSF5 | +   | -   | - | <a href="#">958</a>   | tumor necrosis factor receptor superfamily, member 5                                                            |
|               | RALBP1  | -   | +   | - | <a href="#">10928</a> | ralA binding protein 1                                                                                          |
|               | LTK     | +/- | +   | - | <a href="#">4058</a>  | leukocyte tyrosine kinase                                                                                       |
|               | OXT     | +/- | +   | - | <a href="#">5020</a>  | oxytocin, prepro- (neurophysin I)                                                                               |
|               | WNT2    | +/- | +   | + | <a href="#">7472</a>  | wingless-type MMTV integration site family member 2                                                             |
|               | STAC    | +   | -   | + | <a href="#">6769</a>  | SH3 and cysteine rich domain                                                                                    |
|               | TRAF3   | -   | -   | + | <a href="#">7187</a>  | TNF receptor-associated factor 3                                                                                |
|               | EPHB1   | -   | -   | + | <a href="#">2047</a>  | EPH receptor B1                                                                                                 |
|               | CORO1C  | -   | -   | + | <a href="#">23603</a> | coronin, actin binding protein, 1C                                                                              |
|               | GRIK1   | -   | -   | + | <a href="#">2897</a>  | glutamate receptor, ionotropic, kainate 1                                                                       |
| ion transport | TCIRG1  | +   | -   | - | <a href="#">10312</a> | T-cell, immune regulator 1, ATPase, H+ transporting, lysosomal V0 protein a isoform 3                           |
|               | COL1A1  | +   | -   | - | <a href="#">1277</a>  | collagen, type I, alpha 1                                                                                       |
|               | GALR1   | +   | +   | + | <a href="#">2587</a>  | galanin receptor 1                                                                                              |
|               | GRIA4   | +   | +   | + | <a href="#">2893</a>  | glutamate receptor, ionotropic, AMPA 4                                                                          |
|               | GRIK2   | +   | +   | + | <a href="#">2898</a>  | glutamate receptor, ionotropic, kainate 2                                                                       |

|                |     |     |   |                        |                                                                                                     |
|----------------|-----|-----|---|------------------------|-----------------------------------------------------------------------------------------------------|
| <i>KCNA6</i>   | +   | -   | + | <a href="#">3742</a>   | potassium voltage-gated channel, shaker-related subfamily, member 6                                 |
| <i>KCNN2</i>   | +   | -   | + | <a href="#">3781</a>   | potassium intermediate/small conductance calcium-activated channel, subfamily N, member 2           |
| <i>SCNN1B</i>  | +   | -   | - | <a href="#">6338</a>   | sodium channel, nonvoltage-gated 1, beta (Liddle syndrome)                                          |
| <i>SLC5A5</i>  | +   | -   | - | <a href="#">6528</a>   | solute carrier family 5 (sodium iodide symporter), member 5                                         |
| <i>TF</i>      | +   | -   | + | <a href="#">7018</a>   | transferrin                                                                                         |
| <i>TRPC4</i>   | +   | -   | + | <a href="#">7223</a>   | transient receptor potential cation channel, subfamily C, member 4                                  |
| <i>TRPC6</i>   | +   | +   | + | <a href="#">7225</a>   | transient receptor potential cation channel, subfamily C, member 6                                  |
| <i>CACNA1E</i> | +   | -   | + | <a href="#">777</a>    | calcium channel, voltage-dependent, alpha 1E subunit                                                |
| <i>SLC4A11</i> | +   | +/- | - | <a href="#">83959</a>  | solute carrier family 4, sodium bicarbonate transporter-like, member 11                             |
| <i>KCNV1</i>   | -   | +   | - | <a href="#">27012</a>  | potassium channel, subfamily V, member 1                                                            |
| <i>GABRB2</i>  | -   | +   | - | <a href="#">2561</a>   | gamma-aminobutyric acid (GABA) A receptor, beta 2                                                   |
| <i>KCNC1</i>   | +/- | +   | + | <a href="#">3746</a>   | potassium voltage-gated channel, Shaw-related subfamily, member 1                                   |
| <i>COL9A1</i>  | +/- | +/- | + | <a href="#">1297</a>   | collagen, type IX, alpha 1                                                                          |
| <i>KCNA1</i>   | +   | -   | - | <a href="#">3736</a>   | potassium voltage-gated channel, shaker-related subfamily, member 1 (episodic ataxia with myokymia) |
| <i>CACNG3</i>  | -   | -   | + | <a href="#">10368</a>  | calcium channel, voltage-dependent, gamma subunit 3                                                 |
| <i>RYR3</i>    | -   | -   | + | <a href="#">6263</a>   | ryanodine receptor 3                                                                                |
| <i>TRPA1</i>   | -   | -   | + | <a href="#">8989</a>   | transient receptor potential cation channel, subfamily A, member 1                                  |
| <i>C7orf13</i> | -   | +/- | + | <a href="#">129790</a> | chromosome 7 open reading frame 13                                                                  |
| <i>PKD2L2</i>  | +/- | -   | + | <a href="#">27039</a>  | polycystic kidney disease 2-like 2                                                                  |
| <i>GRIK1</i>   | -   | -   | + | <a href="#">2897</a>   | glutamate receptor, ionotropic, kainate 1                                                           |
