# Supplementary material for: Evidence for an instructive mechanism of de novo methylation in cancer cells
Source: Springer Nature journal article supplement (doi:10.1038/ng1719), 2006-01-24
Supplement: 41588_2006_BFng1719_MOESM6_ESM.pdf [file 41588_2006_BFng1719_MOESM6_ESM.pdf]

|                                        |           |        |         |           |     |   |   |         |            |         |            |           |            |             |            |             |             |             |            |            |            |          |         |           |  |  |
|----------------------------------------|-----------|--------|---------|-----------|-----|---|---|---------|------------|---------|------------|-----------|------------|-------------|------------|-------------|-------------|-------------|------------|------------|------------|----------|---------|-----------|--|--|
| general transcription factor IIB       | MM 001151 | 2966   | 662133  | 30931901  | neq | 0 | 1 | 0.98252 | 0.0184229  | 0.81628 | 0.7088467  | 0.476622  | 1.0647190  | 0.000000771 | 1.6186346  | 0.708       | 0.1875      | 0.859829545 | 0.5053370  | 0.73491006 | 0.64784636 | 0.731776 | 0.61681 | 0.7138246 |  |  |
| asparagine tRNA synthetase             | MM 001152 | 554979 | 1862131 | 554979    | neq | 0 | 1 | 0.93192 | 0.0412451  | 0.84202 | 0.7086705  | 0.342222  | 1.0195238  | 0.8615458   | 0.80876295 | 0.239811351 | 1.415471712 | 0.9581765   | 0.91256429 | 0.73203284 | 0.46806726 | 0.973217 | 0.60703 | 0.831462  |  |  |
| endothelin 3                           | MM 001153 | 1908   | 2041332 | 5740496   | neq | 0 | 1 |         |            |         |            |           |            |             |            |             |             |             |            |            |            |          |         |           |  |  |
| elastase, liver (Drosophila hom.)      | MM 001210 | 1741   | 741311  | 6582739   | neq | 0 | 1 |         |            |         |            |           |            |             |            |             |             |             |            |            |            |          |         |           |  |  |
| collactin 1b                           | MM 001211 | 24088  | 1961333 | 58189958  | neq | 0 | 1 | 0.92958 | 0.4385524  | 0.23044 | 1.2222992  | 0.413309  | 1.0539569  | 0.00338921  | 2.5237345  |             |             |             |            |            |            |          |         |           |  |  |
| HTAP protein                           | MM 001283 | 84513  | 102483  | 3764204   | pos | 0 | 2 | 0.0737  | 0.2148855  | 0.23044 | 1.2222992  |           |            |             |            |             |             |             |            |            |            |          |         |           |  |  |
| procathepsin B                         | MM 001287 | 37328  | 342131  | 1621007   | neq | 0 | 1 | 0.0109  | 0.2136352  | 0.59095 | 0.8950103  |           |            |             |            |             |             |             |            |            |            |          |         |           |  |  |
| black-stem homology domain-c           | MM 010491 | 45977  | 24312   | 174709836 | neq | 0 | 1 |         |            |         |            |           |            |             |            |             |             |             |            |            |            |          |         |           |  |  |
| HSPC90 protein                         | MM 010492 | 28958  | 1742131 | 4051992   | neq | 0 | 1 | 0.94505 | 0.0511624  | 0.57268 | 0.9265719  | 0.064901  | 1.29027719 | 0.2554762   | 1.1631375  |             |             |             |            |            |            |          |         |           |  |  |
| adrenergic alpha-1b, receptor          | MM 010493 | 151    | 20122   | 1512012   | neq | 0 | 1 |         |            |         |            |           |            |             |            |             |             |             |            |            |            |          |         |           |  |  |
| calicinin-related polypeptide, C       | MM 000728 | 797    | 116152  | 16238849  | pos | 0 | 1 |         |            |         |            |           |            |             |            |             |             |             |            |            |            |          |         |           |  |  |
| chromosome 21 open reading             | MM 001469 | 54609  | 2162211 | 54609     | neq | 0 | 1 | 0.10568 | 0.54186629 | 0.1389  | 1.4126969  | 0.74274   | 0.8291734  | 0.7418925   | 0.73650308 |             |             |             |            |            |            |          |         |           |  |  |
| hyposulfite oxidase                    | MM 017881 | 54897  | 10233   | 53391458  | neq | 0 | 1 | 0.22009 | 1.39550362 | 0.08851 | 0.85855029 | 0.70353   | 0.89211458 | 0.4641605   | 0.87250148 |             |             |             |            |            |            |          |         |           |  |  |
| KIAA0645 gene product                  | MM 014662 | 9481   | 220122  | 2884896   | neq | 0 | 1 | 0.0819  | 1.8695482  | 0.66376 | 0.91413358 | 0.3614045 | 1.1203453  | 0.9702714   | 0.5131569  |             |             |             |            |            |            |          |         |           |  |  |
| mitochondrial topoisomerase 1          | MM 002943 | 11647  | 92043   | 14252024  | neq | 0 | 1 | 0.5454  | 0.9473005  | 0.7362  | 0.78966483 | 0.42084   | 1.0505703  | 0.5126736   | 0.80545272 |             |             |             |            |            |            |          |         |           |  |  |
| zinc finger protein                    | MM 014347 | 25799  | 194133  | 59879490  | pos | 0 | 1 | 0.2752  | 1.2177922  | 0.05819 | 0.49614887 | 0.49806   | 0.99404924 | 0.5481204   | 0.84285337 |             |             |             |            |            |            |          |         |           |  |  |
| arctocaulin alpha 2                    | MM 018905 | 54146  | 50131   | 3999882   | neq | 0 | 1 |         |            |         |            |           |            |             |            |             |             |             |            |            |            |          |         |           |  |  |
| ubiquitin specific protease 21         | MM 019372 | 27005  | 10223   | 158840828 | neq | 0 | 1 | 0.52334 | 0.9002559  | 0.2822  | 1.2026427  | 0.94405   | 1.0662057  | 0.4807176   | 0.8851845  |             |             |             |            |            |            |          |         |           |  |  |
| HSPC90 protein                         | MM 019373 | 6598   | 10231   | 23781417  | neq | 0 | 1 | 0.4396  | 1.0225133  | 0.1538  | 1.7863034  | 0.73738   | 0.4704297  | 0.9373819   | 0.5314263  |             |             |             |            |            |            |          |         |           |  |  |
| heparan sulfate (alcosamine)           | MM 001114 | 9957   | 45153   | 1107420   | pos | 0 | 1 | 0.0339  | 1.7403139  | 0.3611  | 1.5444444  | 0.25088   | 1.2231568  | 0.558926    | 0.8993139  |             |             |             |            |            |            |          |         |           |  |  |
| Sarcosine synthase                     | MM 005334 | 10534  | 116131  | 4783344   | neq | 0 | 1 | 0.3392  | 1.159202   | 0.14748 | 0.44194915 | 0.70510   | 0.86178401 | 0.47848     | 0.44194915 |             |             |             |            |            |            |          |         |           |  |  |
| potassium channel, subfamily           | MM 002216 | 3777   | 22423   | 2683646   | neq | 0 | 1 |         |            |         |            |           |            |             |            |             |             |             |            |            |            |          |         |           |  |  |
| related RAS viral (ras) oncog          | MM 006270 | 6237   | 1901333 | 59709884  | neq | 0 | 1 | 0.0737  | 1.6273392  | 0.5458  | 0.96162841 | 0.3594953 | 1.4340560  | 0.9864492   | 0.5057870  |             |             |             |            |            |            |          |         |           |  |  |
| hyposulfite oxidase                    | MM 014663 | 9481   | 220122  | 2884896   | neq | 0 | 1 | 0.0819  | 1.8695482  | 0.66376 | 0.91413358 | 0.3614045 | 1.1203453  | 0.9702714   | 0.5131569  |             |             |             |            |            |            |          |         |           |  |  |
| hormon coat B1                         | MM 002144 | 3211   | 1762132 | 48317770  | neq | 0 | 1 |         |            |         |            |           |            |             |            |             |             |             |            |            |            |          |         |           |  |  |
| phosphotransferase 5                   | MM 021965 | 6239   | 94211   | 62105553  | neq | 0 | 1 | 0.0782  | 1.52394549 | 0.1908  | 1.2919852  | 0.12777   | 1.5692784  | 0.0001161   | 2.0294831  |             |             |             |            |            |            |          |         |           |  |  |
| CasI, interacting molecule             | MM 027645 | 64780  | 6421    | 19096588  | neq | 0 | 1 | 0.0439  | 0.89209287 | 0.22562 | 1.3074649  | 0.78817   | 1.3287205  | 0.99296     | 0.3814715  |             |             |             |            |            |            |          |         |           |  |  |
| retinoblastoma binding protein         | MM 003000 | 5926   | 146231  | 56096482  | neq | 0 | 1 | 0.1623  | 1.3181068  | 0.2308  | 1.214817   | 0.87663   | 0.8620265  | 0.5410721   | 0.53220015 |             |             |             |            |            |            |          |         |           |  |  |
| urokinase protein band 4.1L            | MM 002140 | 6497   | 52131   | 11123446  | neq | 0 | 1 | 0.1526  | 1.3891339  | 0.3611  | 1.5444444  | 0.25088   | 1.2231568  | 0.558926    | 0.8993139  |             |             |             |            |            |            |          |         |           |  |  |
| TRK tyrosine kinase                    | MM 001748 | 9079   | 99149   | 40572949  | neq | 0 | 1 | 0.4418  | 1.0851329  | 0.2918  | 1.6726863  | 0.90984   | 0.3552431  | 0.4716524   | 0.50889414 |             |             |             |            |            |            |          |         |           |  |  |
| ATPase, Na+/K+, transporting,          | MM 001282 | 482    | 176131  | 8057299   | neq | 0 | 1 |         |            |         |            |           |            |             |            |             |             |             |            |            |            |          |         |           |  |  |
| hyposulfite oxidase                    | MM 014662 | 9481   | 220122  | 2884896   | neq | 0 | 1 | 0.0819  | 1.8695482  | 0.66376 | 0.91413358 | 0.3614045 | 1.1203453  | 0.9702714   | 0.5131569  |             |             |             |            |            |            |          |         |           |  |  |
| insulin 1, 4, 5-isoforms               | MM 002492 | 2707   | 1462121 | 39714621  | neq | 0 | 1 |         |            |         |            |           |            |             |            |             |             |             |            |            |            |          |         |           |  |  |
| arctocaulin alpha 2                    | MM 018905 | 54146  | 50131   | 3999882   | neq | 0 | 1 |         |            |         |            |           |            |             |            |             |             |             |            |            |            |          |         |           |  |  |
| arctocaulin alpha 2                    | MM 018905 | 54146  | 50131   | 3999882   | neq | 0 | 1 |         |            |         |            |           |            |             |            |             |             |             |            |            |            |          |         |           |  |  |
| multiple inositol polyphosphat         | MM 000971 | 9562   | 102231  | 8812626   | neq | 0 | 1 | 0.48937 | 1.0052848  | 0.88205 | 0.8662879  | 0.20927   | 1.2287018  | 0.8644758   | 0.81146073 |             |             |             |            |            |            |          |         |           |  |  |
| PKS-1                                  | MM 044510 | 18208  | 10212   | 8920812   | neq | 0 | 1 | 0.3819  | 1.3971803  | 0.15317 | 1.41362409 | 0.95349   | 0.7287663  | 0.2862179   | 0.704191   |             |             |             |            |            |            |          |         |           |  |  |
| prp28, US snRNP 100 kb protein         | MM 024850 | 9416   | 1201332 | 49116956  | pos | 0 | 1 | 0.2834  | 1.2103749  | 0.14359 | 1.4800243  | 0.95349   | 0.7287663  | 0.2862179   | 0.704191   |             |             |             |            |            |            |          |         |           |  |  |
| adenosine deaminase                    | MM 000498 | 2651   | 10212   | 1821648   | neq | 0 | 1 | 0.15039 | 1.2709578  | 0.14787 | 1.2709578  | 0.442167  | 1.0460474  | 0.2462425   | 1.0276583  |             |             |             |            |            |            |          |         |           |  |  |
| arctocaulin-alpha 2                    | MM 000971 | 9562   | 102231  | 8812626   | neq | 0 | 1 | 0.48937 | 1.0052848  | 0.88205 | 0.8662879  | 0.20927   | 1.2287018  | 0.8644758   | 0.81146073 |             |             |             |            |            |            |          |         |           |  |  |
| multiple inositol polyphosphat         | MM 000971 | 9562   | 102231  | 8812626   | neq | 0 | 1 | 0.48937 | 1.0052848  | 0.88205 | 0.8662879  | 0.20927   | 1.2287018  | 0.8644758   | 0.81146073 |             |             |             |            |            |            |          |         |           |  |  |
| hyposulfite oxidase                    | MM 014663 | 9481   | 220122  | 2884896   | neq | 0 | 1 | 0.0819  | 1.8695482  | 0.66376 | 0.91413358 | 0.3614045 | 1.1203453  | 0.9702714   | 0.5131569  |             |             |             |            |            |            |          |         |           |  |  |
| retinoic acid receptor respond         | MM 002889 | 5919   | 74361   | 14822055  | neq | 0 | 1 |         |            |         |            |           |            |             |            |             |             |             |            |            |            |          |         |           |  |  |
| KIAA0352 gene product                  | MM 002889 | 5919   | 74361   | 14822055  | neq | 0 | 1 |         |            |         |            |           |            |             |            |             |             |             |            |            |            |          |         |           |  |  |
| hyposulfite oxidase                    | MM 014663 | 9481   | 220122  | 2884896   | neq | 0 | 1 | 0.0819  | 1.8695482  | 0.66376 | 0.91413358 | 0.3614045 | 1.1203453  | 0.9702714   | 0.5131569  |             |             |             |            |            |            |          |         |           |  |  |
| glutamate receptor, metabotropic       | MM 000644 | 2917   | 36261   | 8631709   | pos | 0 | 1 | 0.00152 | 2.81104892 | 0.22143 | 1.9974653  | 1         | 0.16734687 | 0.9941216   | 0.34295564 |             |             |             |            |            |            |          |         |           |  |  |
| ketonase protein 15                    | MM 001183 | 6299   | 10212   | 81332118  | neq | 0 | 1 | 0.34789 | 1.1061658  | 0.0342  | 1.9013274  | 0.00195   | 1.8804252  | 0.0289338   | 1.5308844  |             |             |             |            |            |            |          |         |           |  |  |
| cyclin T2                              | MM 002216 | 3777   | 22423   | 2683646   | neq | 0 | 1 |         |            |         |            |           |            |             |            |             |             |             |            |            |            |          |         |           |  |  |
| actin interacting transcription factor | MM 001282 | 482    | 176131  | 8057299   | neq | 0 | 1 |         |            |         |            |           |            |             |            |             |             |             |            |            |            |          |         |           |  |  |
| hyposulfite oxidase                    | MM 014662 | 9481   | 220122  | 2884896   | neq | 0 | 1 | 0.0819  | 1.8695482  | 0.66376 | 0.91413358 | 0.3614045 | 1.1203453  | 0.9702714   | 0.5131569  |             |             |             |            |            |            |          |         |           |  |  |
| hyposulfite oxidase                    | MM 014662 | 9481   | 220122  | 2884896   | neq | 0 | 1 | 0.0819  | 1.8695482  | 0.66376 | 0.91413358 | 0.3614045 | 1.1203453  | 0.9702714   | 0.5131569  |             |             |             |            |            |            |          |         |           |  |  |
| hyposulfite oxidase                    | MM 014662 | 9481   | 220122  | 2884896   | neq | 0 | 1 | 0.0819  | 1.8695482  | 0.66376 | 0.91413358 | 0.3614045 | 1.1203453  | 0.9702714   | 0.5131569  |             |             |             |            |            |            |          |         |           |  |  |
| hyposulfite oxidase                    | MM 014662 | 9481   | 220122  | 2884896   | neq | 0 | 1 | 0.0819  | 1.8695482  | 0.66376 | 0.9141     |           |            |             |            |             |             |             |            |            |            |          |         |           |  |  |











































|                                             |               |   |   |          |            |          |            |          |            |            |            |            |            |            |            |           |           |             |            |           |            |           |           |           |           |
|---------------------------------------------|---------------|---|---|----------|------------|----------|------------|----------|------------|------------|------------|------------|------------|------------|------------|-----------|-----------|-------------|------------|-----------|------------|-----------|-----------|-----------|-----------|
| soluble carrier family 1 (neural an NC05626 | 6510 1901332  | 1 | 1 | 0.219156 | 0.62516719 | 0.171988 | 0.74146647 | 0.202839 | 0.14713556 | 0.600631   | 0.75561955 | 0.41705465 | 1.02772725 | 0.39267295 | 1.03111683 | 0.375899  | 0.890207  | 0.407939317 | 0.17323660 | 0.8340495 | 0.50566403 | 0.5621    | 0.7622    | 0.5862187 |           |
| soluble carrier family 1 (neural an NC05626 | 1985 1583194  | 1 | 1 | 0.24415  | 0.1583194  | 0.13422  | 1.59747438 | 0.48894  | 0.8373694  | 0.4422085  | 1.0174781  | 0.4122085  | 1.0174781  | 0.4122085  | 0.4122085  | 0.4122085 | 0.4122085 | 0.4122085   | 0.4122085  | 0.4122085 | 0.4122085  | 0.4122085 | 0.4122085 | 0.4122085 | 0.4122085 |
| soluble carrier family 1 (neural an NC05626 | 8683 1422431  | 1 | 1 | 0.6319   | 0.1912933  | 0.171988 | 1.6262701  | 0.430984 | 1.1837485  | 0.4504451  | 0.9758655  | 0.3794441  | 1.02772725 | 0.39267295 | 1.03111683 | 0.375899  | 0.890207  | 0.407939317 | 0.17323660 | 0.8340495 | 0.50566403 | 0.5621    | 0.7622    | 0.5862187 |           |
| hypothetical protein FLJ110142              | 56079 39142   | 1 | 1 | 0.48483  | 0.10245868 | 0.26395  | 1.8044783  | 0.950509 | 0.8132291  | 0.5488205  | 0.64751565 | 0.5299971  | 1.0433025  | 0.5969796  | 0.69982128 | 0.526931  | 0.94331   | 0.407939317 | 0.17323660 | 0.8340495 | 0.50566403 | 0.5621    | 0.7622    | 0.5862187 |           |
| hypothetical protein FLJ110142              | 26498 1201122 | 1 | 1 | 0.97144  | 0.51251655 | 0.36795  | 0.5778663  | 0.890502 | 1.39855918 | 0.70025785 | 0.85970418 | 0.7104001  | 1.057537   | 0.5969796  | 0.69982128 | 0.526931  | 0.94331   | 0.407939317 | 0.17323660 | 0.8340495 | 0.50566403 | 0.5621    | 0.7622    | 0.5862187 |           |
| lysine kinase 2                             | 7297 191123   | 1 | 1 | 0.83333  | 1.2244465  | 0.30133  | 1.0274811  | 0.803333 | 1.2244465  | 0.30133    | 1.0274811  | 0.803333   | 1.2244465  | 0.30133    | 1.0274811  | 0.803333  | 1.2244465 | 0.30133     | 1.0274811  | 0.803333  | 1.2244465  | 0.30133   | 1.0274811 | 0.803333  |           |
| retinoic acid inducible 14                  | 10748 191123  | 1 | 1 | 0.24389  | 1.4351578  | 0.06796  | 2.2881723  | 0.46337  | 1.0460919  | 0.4048479  | 1.9068919  | 0.2514922  | 1.0460919  | 0.4048479  | 1.9068919  | 0.2514922 | 1.0460919 | 0.4048479   | 1.9068919  | 0.2514922 | 1.0460919  | 0.4048479 | 1.9068919 | 0.2514922 |           |
| carbohydrate (chondroitin) synth            | 10748 191123  | 1 | 1 | 0.24389  | 1.4351578  | 0.06796  | 2.2881723  | 0.46337  | 1.0460919  | 0.4048479  | 1.9068919  | 0.2514922  | 1.0460919  | 0.4048479  | 1.9068919  | 0.2514922 | 1.0460919 | 0.4048479   | 1.9068919  | 0.2514922 | 1.0460919  | 0.4048479 | 1.9068919 | 0.2514922 |           |
| hypothetical protein FLJ114213              | 37899 11013   | 1 | 1 | 0.14225  | 0.6805166  | 0.36131  | 1.2925442  | 0.71235  | 1.2948641  | 0.6479235  | 0.82119478 | 0.10252134 | 1.0993178  | 0.3705506  | 0.4483337  | 0.16158   | 1.76096   | 0.407939317 | 0.17323660 | 0.8340495 | 0.50566403 | 0.5621    | 0.7622    | 0.5862187 |           |
| interferon regulatory factor 3              | 3611 191123   | 1 | 1 | 0.27349  | 1.20299757 | 0.30133  | 1.0274811  | 0.803333 | 1.2244465  | 0.30133    | 1.0274811  | 0.803333   | 1.2244465  | 0.30133    | 1.0274811  | 0.803333  | 1.2244465 | 0.30133     | 1.0274811  | 0.803333  | 1.2244465  | 0.30133   | 1.0274811 | 0.803333  |           |
| hypothetical protein FLJ20721               | 3000 191123   | 1 | 1 | 0.27349  | 1.20299757 | 0.30133  | 1.0274811  | 0.803333 | 1.2244465  | 0.30133    | 1.0274811  | 0.803333   | 1.2244465  | 0.30133    | 1.0274811  | 0.803333  | 1.2244465 | 0.30133     | 1.0274811  | 0.803333  | 1.2244465  | 0.30133   | 1.0274811 | 0.803333  |           |
| NADH dehydrogenase (ubiquinone              | 4779 24323    | 1 | 1 | 0.27349  | 1.20299757 | 0.30133  | 1.0274811  | 0.803333 | 1.2244465  | 0.30133    | 1.0274811  | 0.803333   | 1.2244465  | 0.30133    | 1.0274811  | 0.803333  | 1.2244465 | 0.30133     | 1.0274811  | 0.803333  | 1.2244465  | 0.30133   | 1.0274811 | 0.803333  |           |
| soluble carrier family 23 (nucleo)          | 962 20106     | 1 | 1 | 0.27349  | 1.20299757 | 0.30133  | 1.0274811  | 0.803333 | 1.2244465  | 0.30133    | 1.0274811  | 0.803333   | 1.2244465  | 0.30133    | 1.0274811  | 0.803333  | 1.2244465 | 0.30133     | 1.0274811  | 0.803333  | 1.2244465  | 0.30133   | 1.0274811 | 0.803333  |           |
| similar to rat intracellular membra         | 25812 226112  | 1 | 1 | 0.27349  | 1.20299757 | 0.30133  | 1.0274811  | 0.803333 | 1.2244465  | 0.30133    | 1.0274811  | 0.803333   | 1.2244465  | 0.30133    | 1.0274811  | 0.803333  | 1.2244465 | 0.30133     | 1.0274811  | 0.803333  | 1.2244465  | 0.30133   | 1.0274811 | 0.803333  |           |
| HLA class II region expressed ex            | 10471 462132  | 1 | 1 | 0.27349  | 1.20299757 | 0.30133  | 1.0274811  | 0.803333 | 1.2244465  | 0.30133    | 1.0274811  | 0.803333   | 1.2244465  | 0.30133    | 1.0274811  | 0.803333  | 1.2244465 | 0.30133     | 1.0274811  | 0.803333  | 1.2244465  | 0.30133   | 1.0274811 | 0.803333  |           |
| suppressor of variegation 3 (D)             | 7923 10120    | 1 | 1 | 0.27349  | 1.20299757 | 0.30133  | 1.0274811  | 0.803333 | 1.2244465  | 0.30133    | 1.0274811  | 0.803333   | 1.2244465  | 0.30133    | 1.0274811  | 0.803333  | 1.2244465 | 0.30133     | 1.0274811  | 0.803333  | 1.2244465  | 0.30133   | 1.0274811 | 0.803333  |           |
| HIV-1 tat intracellular membra              | 10524 110131  | 1 | 1 | 0.27349  | 1.20299757 | 0.30133  | 1.0274811  | 0.803333 | 1.2244465  | 0.30133    | 1.0274811  | 0.803333   | 1.2244465  | 0.30133    | 1.0274811  | 0.803333  | 1.2244465 | 0.30133     | 1.0274811  | 0.803333  | 1.2244465  | 0.30133   | 1.0274811 | 0.803333  |           |
| hypothetical protein MG5576                 | 79022 1201311 | 1 | 1 | 0.27349  | 1.20299757 | 0.30133  | 1.0274811  | 0.803333 | 1.2244465  | 0.30133    | 1.0274811  | 0.803333   | 1.2244465  | 0.30133    | 1.0274811  | 0.803333  | 1.2244465 | 0.30133     | 1.0274811  | 0.803333  | 1.2244465  | 0.30133   | 1.0274811 | 0.803333  |           |
| transferrin growth factor beta              | 7040 191123   | 1 | 1 | 0.27349  | 1.20299757 | 0.30133  | 1.0274811  | 0.803333 | 1.2244465  | 0.30133    | 1.0274811  | 0.803333   | 1.2244465  | 0.30133    | 1.0274811  | 0.803333  | 1.2244465 | 0.30133     | 1.0274811  | 0.803333  | 1.2244465  | 0.30133   | 1.0274811 | 0.803333  |           |
| tumor necrosis factor receptor s            | 101250 95     | 1 | 1 | 0.27349  | 1.20299757 | 0.30133  | 1.0274811  | 0.803333 | 1.2244465  | 0.30133    | 1.0274811  | 0.803333   | 1.2244465  | 0.30133    | 1.0274811  | 0.803333  | 1.2244465 | 0.30133     | 1.0274811  | 0.803333  | 1.2244465  | 0.30133   | 1.0274811 | 0.803333  |           |
| TAR (HIV) RNA binding protein 1             | 6894 14622    | 1 | 1 | 0.27349  | 1.20299757 | 0.30133  | 1.0274811  | 0.803333 | 1.2244465  | 0.30133    | 1.0274811  | 0.803333   | 1.2244465  | 0.30133    | 1.0274811  | 0.803333  | 1.2244465 | 0.30133     | 1.0274811  | 0.803333  | 1.2244465  | 0.30133   | 1.0274811 | 0.803333  |           |
| SKI intracellular protein                   | 22998 146223  | 1 | 1 | 0.27349  | 1.20299757 | 0.30133  | 1.0274811  | 0.803333 | 1.2244465  | 0.30133    | 1.0274811  | 0.803333   | 1.2244465  | 0.30133    | 1.0274811  | 0.803333  | 1.2244465 | 0.30133     | 1.0274811  | 0.803333  | 1.2244465  | 0.30133   | 1.0274811 | 0.803333  |           |
| neurofilament X (overexpressed)             | 10554 110131  | 1 | 1 | 0.27349  | 1.20299757 | 0.30133  | 1.0274811  | 0.803333 | 1.2244465  | 0.30133    | 1.0274811  | 0.803333   | 1.2244465  | 0.30133    | 1.0274811  | 0.803333  | 1.2244465 | 0.30133     | 1.0274811  | 0.803333  | 1.2244465  | 0.30133   | 1.0274811 | 0.803333  |           |
| neuronal distribution gene C homo           | 10726 10522   | 1 | 1 | 0.27349  | 1.20299757 | 0.30133  | 1.0274811  | 0.803333 | 1.2244465  | 0.30133    | 1.0274811  | 0.803333   | 1.2244465  | 0.30133    | 1.0274811  | 0.803333  | 1.2244465 | 0.30133     | 1.0274811  | 0.803333  | 1.2244465  | 0.30133   | 1.0274811 | 0.803333  |           |
| nitric oxide synthase 1 (neuronal)          | 4842 1202422  | 1 | 1 | 0.27349  | 1.20299757 | 0.30133  | 1.0274811  | 0.803333 | 1.2244465  | 0.30133    | 1.0274811  | 0.803333   | 1.2244465  | 0.30133    | 1.0274811  | 0.803333  | 1.2244465 | 0.30133     | 1.0274811  | 0.803333  | 1.2244465  | 0.30133   | 1.0274811 | 0.803333  |           |
| hypothetical protein FLJ21499               | 4774 110131   | 1 | 1 | 0.27349  | 1.20299757 | 0.30133  | 1.0274811  | 0.803333 | 1.2244465  | 0.30133    | 1.0274811  | 0.803333   | 1.2244465  | 0.30133    | 1.0274811  | 0.803333  | 1.2244465 | 0.30133     | 1.0274811  | 0.803333  | 1.2244465  | 0.30133   | 1.0274811 | 0.803333  |           |
| NAC1 protein                                | 64101 70231   | 1 | 1 | 0.27349  | 1.20299757 | 0.30133  | 1.0274811  | 0.803333 | 1.2244465  | 0.30133    | 1.0274811  | 0.803333   | 1.2244465  | 0.30133    | 1.0274811  | 0.803333  | 1.2244465 | 0.30133     | 1.0274811  | 0.803333  | 1.2244465  | 0.30133   | 1.0274811 | 0.803333  |           |
| betalin-hydroxylase multimer                | 535 54113     | 1 | 1 | 0.27349  | 1.20299757 | 0.30133  | 1.0274811  | 0.803333 | 1.2244465  | 0.30133    | 1.0274811  | 0.803333   | 1.2244465  | 0.30133    | 1.0274811  | 0.803333  | 1.2244465 | 0.30133     | 1.0274811  | 0.803333  | 1.2244465  | 0.30133   | 1.0274811 | 0.803333  |           |
| xyloferritin beta 1-4-galactosyl            | 11285 50316   | 1 | 1 | 0.27349  | 1.20299757 | 0.30133  | 1.0274811  | 0.803333 | 1.2244465  | 0.30133    | 1.0274811  | 0.803333   | 1.2244465  | 0.30133    | 1.0274811  | 0.803333  | 1.2244465 | 0.30133     | 1.0274811  | 0.803333  | 1.2244465  | 0.30133   | 1.0274811 | 0.803333  |           |
| hypothetical protein FLJ110077              | 81550 130212  | 1 | 1 | 0.27349  | 1.20299757 | 0.30133  | 1.0274811  | 0.803333 | 1.2244465  | 0.30133    | 1.0274811  | 0.803333   | 1.2244465  | 0.30133    | 1.0274811  | 0.803333  | 1.2244465 | 0.30133     | 1.0274811  | 0.803333  | 1.2244465  | 0.30133   | 1.0274811 | 0.803333  |           |
| alpha-2-macroglobulin chain                 | 9448 4622     | 1 | 1 | 0.27349  | 1.20299757 | 0.30133  | 1.0274811  | 0.803333 | 1.2244465  | 0.30133    | 1.0274811  | 0.803333   | 1.2244465  | 0.30133    | 1.0274811  | 0.803333  | 1.2244465 | 0.30133     | 1.0274811  | 0.803333  | 1.2244465  | 0.30133   | 1.0274811 | 0.803333  |           |
| anti-specific tyrosine (V) phos             | 9149 191123   | 1 | 1 | 0.27349  | 1.20299757 | 0.30133  | 1.0274811  | 0.803333 | 1.2244465  | 0.30133    | 1.0274811  | 0.803333   | 1.2244465  | 0.30133    | 1.0274811  | 0.803333  | 1.2244465 | 0.30133     | 1.0274811  | 0.803333  | 1.2244465  | 0.30133   | 1.0274811 | 0.803333  |           |
| SET domain containing protein 7             | 80554 46113   | 1 | 1 | 0.27349  | 1.20299757 | 0.30133  | 1.0274811  | 0.803333 | 1.2244465  | 0.30133    | 1.0274811  | 0.803333   | 1.2244465  | 0.30133    | 1.0274811  | 0.803333  | 1.2244465 | 0.30133     | 1.0274811  | 0.803333  | 1.2244465  | 0.30133   | 1.0274811 | 0.803333  |           |
| NEL like 1 (chicken)                        | 10001 191123  | 1 | 1 | 0.27349  | 1.20299757 | 0.30133  | 1.0274811  | 0.803333 | 1.2244465  | 0.30133    | 1.0274811  | 0.803333   | 1.2244465  | 0.30133    | 1.0274811  | 0.803333  | 1.2244465 | 0.30133     | 1.0274811  | 0.803333  | 1.2244465  | 0.30133   | 1.0274811 | 0.803333  |           |
| 3 hydroxy-3-methylglutaryl CoA              | 3156 50316    | 1 | 1 | 0.27349  | 1.20299757 | 0.30133  | 1.0274811  | 0.803333 | 1.2244465  | 0.30133    | 1.0274811  | 0.803333   | 1.2244465  | 0.30133    | 1.0274811  | 0.803333  | 1.2244465 | 0.3         |            |           |            |           |           |           |           |











































Table with 4 columns: Gene Name, Gene ID, RefSeq ID, and Protein ID. The table lists various genes such as archaetidine flavonase 3, Bornaetia vesicii-associated protein, LARS, LARS leucine isoenzyme, and many others, along with their corresponding identifiers.

Table with 4 columns: Gene Name, Gene ID, RefSeq ID, and Protein ID. The table continues with gene entries like ADP-ribosylation factor related to SRY, ADR-1, ADR-2, ADR-3, and ADR-4, ending with ADP-ribosylation factor 3 beta.



Table with columns for gene name, chromosome, coordinates, and various numerical values. The data is organized into multiple columns, with gene names on the left and numerical values on the right. Some rows are highlighted in light blue. The table covers a wide range of genes and their associated genomic information.























0.79027826 0.65059694 0.72051471 0.45079231 0.80079567 0.53466 0.73884 0.65479 0.70081  
1.6578093 0.15840804 1.2491986 0.55863739 0.75142283 0.21443 1.22031 0.17098 1.29747

1.01992004 0.860148847 0.5475975 0.45696892 0.87277344 0.50049 0.91784 0.90205 0.50428  
1.23343447 0.79930695 0.6071275 0.60808535 0.6307042 0.50782 0.88335 0.82062 0.60236  
0.92832327 0.60299186 0.91237891 0.6121865 0.83099191 0.46108 0.89231 0.42258 0.93113  
0.9362728 0.77611397 0.85543418 0.3145399 1.11125069 0.2228 1.53954 0.99962 0.2537  
1.18022468 0.33190728 1.11828492 0.79397382 0.5928266 0.47379 0.96034 0.17427 1.24416  
1.09812635 0.56829512 0.92001531 0.62474844 0.68513975 0.4324 0.81935 0.28 1.29963  
0.592233828 0.99454235 0.59162847 0.66210599 0.41894 0.99529 0.41532 0.97156

1.08843571 0.411336462 1.07806783 0.60232135 0.70172283 0.89537 0.58503 0.07667 1.6157  
1.19934633 0.950808726 1.0046317 0.5545378 0.81016852 0.74603 0.76844 0.21025 1.35042

0.95832564 0.358460888 1.05224163 0.48505599 0.7793994 0.15374 1.79768 0.39521 1.3036

1.12790022 0.375671054 1.04657637 0.40999718 0.96347797 0.08539 1.37004 0.41807 0.95729  
1.4307833 0.58517183 0.98344686 0.38137808 0.96524786 0.32941 1.13644 0.4227 0.97943  
1.05643771 0.348865113 1.15384427 0.50700837 0.83940884 0.57571 0.85714 0.24684 1.20944  
2.75040456 0.221279798 1.16022733 0.99751576 0.3619177 0.07912 1.38485 0.01885 1.74548  
1.10394421 0.61460036 0.97108184 0.63936646 0.66407133 0.69126 0.72593 0.41757 0.98012  
0.58586995 0.8058897 0.74764 0.64804 0.31794 1.54545

1.5408384 0.53499764 0.98518022 0.51057663 0.78317945 0.36467 1.08319 0.84051 0.5804  
0.86284562 0.96706942 0.54784253 0.80546899 0.67264897 0.97804 0.48014 0.50822 0.91785

0.98506491 0.392938671 1.19575561 0.63894907 0.63555768 0.21376 1.6488 0.63363 0.66924  
0.714201587 0.50350564 0.52344894 0.69730884 0.73559 0.49819  
0.35981007 1.11741414 0.61908819 0.53997711 0.35102 1.1234 0.33782 1.18178  
0.916433024 0.65646194 0.7377159 0.74217095 0.68798 0.78052 0.93627 0.52924  
0.581848454 0.99879249 0.13056899 1.38763851 0.12176 2.14209 0.40477 0.99861  
0.927109583 0.44501665 0.7158377 0.72306111 0.94495 0.99087 0.44717 0.7937  
0.421826496 1.08370182 0.4685909 0.79261518 0.44129 0.94961 0.20283 1.69205

1.14011789 0.429945879 1.0216301 0.58876606 0.72130441 0.39882 1.02321 0.44017 0.44804  
0.858811752 0.22945035 0.89010452 0.22945035

0.42980056 1.24721503 0.30649 1.96674 0.56428 0.81006

1.20372332 3.26069E-06 3.93646741 3.8211E-05 5.84973282 0.00632 4.1838 0.0025 2.88741  
0.653364183 0.8163529 0.71039457 0.4972433 0.46467 0.94581 0.44741 0.62894

1.40394883 0.32345518 1.03503163 0.34784379 1.0249005 0.14427 1.50142 0.39967 1.26553  
0.91643038 0.056095051 1.33734137 0.20613061 1.24052241 0.02064 1.94745 0.24512 1.17338  
1.13940509 0.558719554 0.97838965 0.77624328 0.65862329 0.88864 0.58966 0.2488 1.5662  
0.82718036 0.1288052331 0.71995017 0.64052331 0.64570962 0.07348 1.89469 0.33815 1.63849  
1.08869274 0.411566749 1.08775903 0.70272029 0.62794122 0.31008 1.16147

0.415261496 1.08932217 0.70742109 0.44116367 0.34397 1.13169  
0.420082947 0.95646614 0.74729614 0.55963141 0.55446 0.81603 0.21746 1.11344  
0.42714779 1.0201535 0.33807748 1.05692157 0.43273 0.98132 0.36161 1.90828

1.86292209 4.49541E-05 2.20209024 0.00075297 2.98237134 0.0295 1.59806 0.00043 1.13013

0.85296646 0.470235997 1.05649653 0.42695006 0.89633846 0.28946 1.54516 0.59287 0.66411

1.5267014 0.105431313 1.43310265 0.49217779 0.87612531 0.24983 1.32774 0.0871 1.4887  
1.16714584 0.070820296 1.3549218 0.19295206 1.426359 0.02702 1.65797 0.82659 0.8432  
1.60532279 0.240752419 1.2984585 0.53248287 0.79281184 0.14288 1.46032 0.46025 0.9412

0.8404097 0.427385637 1.00577609 0.61170632 0.72721294 0.54668 0.83787 0.39935 1.00596  
2.50070189 0.002377105 1.89119667 0.01959049 2.03404572 0.0436 1.56586 0.00921 1.03287  
0.96462682 0.631510601 0.9489161 0.74660127 0.70014115 0.31727 1.08115

1.78588277 0.452107523 1.158561 0.74114657 0.43802043 0.66779 0.56985 0.21001 2.49222  
0.372767851 1.38663738 0.59513144 0.62889693 0.67679 0.56985 0.12812 1.73009  
0.386354137 1.13592484 0.66576822 0.72319675 0.30881 1.19933 0.55327 0.76718  
0.81798207 0.418360399 0.80125201 0.66715072 0.65181671 0.28224 1.19758 0.66384 0.66274  
1.65138201 0.24416507 1.22940167 0.04562969 1.77226407 0.03786 2.87601 0.97613 0.41967  
0.90936697 0.231871899 1.16208803 0.28749973 1.07032688 0.12596 1.39317 0.69946 0.84849  
0.9783987 0.66982523 0.76660736 0.59595934 0.77573004 0.54009 0.66074 0.65813 0.766  
1.5252522 0.337941326 1.3272107 0.64968853 0.79261518 0.28971 1.35962 0.48154 0.81227  
0.68369047 0.81876734 0.91566869 0.39784135 0.87966 0.45345 0.04532 3.28118  
0.519511413 0.48723556 0.96631942 0.49592043 0.34977 1.06188 0.50982 0.68722  
2.1939639 0.394887003 1.04412822 0.96031942 0.49592043 0.34977 1.06188 0.10177 1.3774  
0.75024331 0.701311805 0.96545513 0.77191291 0.70494022 0.43205 0.98959 0.98612 0.40709

0.91195244 0.21272304 0.93975743 0.21272304 0.10529 1.65322 0.41582 0.98956  
0.51486334 0.99928357 0.45798806 0.88167322 0.38841 1.2484 0.30433 1.37115  
0.42899948 1.10279473 0.58327071 0.62852893 0.38841 1.2484 0.92122 0.55555  
0.384788717 1.04781721 0.3222594 1.06537909 0.10515 1.66824 0.29615 1.09094  
1.11378299 0.5435391 0.98649128 0.75623914 0.67578532 0.82974 0.7173 0.29615 1.09094  
0.92088247 0.767423874 0.49263649 0.52011297 0.80253111 0.69598 0.49264 0.73981 0.69104

0.110048875 29.6571632 0.00841791 2.71654324 0.12683 1.34343 0.00195 2.76106  
1.35461673 0.00192566 1.89225227 0.00841791 2.71654324 0.12683 1.34343 0.00195 2.76106  
0.80438282 0.49786826 1.0159056 0.80324806 0.34728779 0.32204 1.23447 0.59894 0.75723  
1.4662596 0.314809243 0.6417113 0.62053423 0.8133864 0.33456 0.98117 0.30786 1.08142  
0.391970345 1.06992383 0.64631117 0.6470792 0.39545 1.05541 0.30433 1.37115  
0.658416527 0.9578807 0.78597908 0.69957186 0.88812 0.65796 0.25205 1.1586  
0.490485471 0.101267781 0.77534246 0.64093575 0.91672 0.59804 0.07128 1.50017  
0.548309925 0.94340091 0.84376422 0.37624366 0.67242 0.66995 0.1136 2.98006  
0.2933768 1.4864982 0.95805361 0.80184144 0.30621 1.36973 0.2651 1.50909  
0.32475643 1.05780888 0.83731594 0.65430735 0.34716 1.04663 0.16147 1.2379  
0.55491741 0.8190734 0.8190734 0.45167975 0.8188716 0.48237 0.78466 0.25421 1.64864  
0.303363994 4.60233952 0.47466814 0.78856775 0.67462 0.66995 0.1136 2.98006  
0.383529786 1.0883050 0.55513233 0.72979423 0.47651 0.87083 0.34353 1.09481  
0.49632892 0.00185106 0.5881599 0.9187266 0.22617 1.20949 0.64942 0.65289

1.63883847 0.301132046 1.26232162 0.58322615 0.75214361 0.21794 1.38246 0.54448 0.81884  
0.43927401 0.30452628 0.90574143 0.8354788 0.6549266 0.21775 1.1636 0.96671 0.51471  
1.23159949 0.474900708 1.0846502 0.51677659 0.76263744 0.23594 2.12603 0.72901 0.50229

0.205237235 1.58254921 0.391865128 1.19562279 0.23093 2.76813 0.30323 1.98837  
0.961473323 0.44874307 0.65327497 0.80656534 0.88551 0.69189 0.30652 0.64543  
0.517036587 0.98891606 0.43044 0.95188 0.33495 1.47369

0.413890457 1.21154429 0.711951 0.60209807 0.13934 1.2999 0.38679 1.21154  
0.455323731 1.03569181 0.52871783 0.87420775 0.57191 0.88861 0.83185 0.68638  
0.57752066 0.8953791 0.52871783 0.87420775 0.57191 0.88861 0.48657 0.93988  
0.236072166 1.23790258 0.55908156 0.78993521 0.58823 0.86195 0.14287 1.32786  
1.49031633 0.501935048 0.00320527 0.82571071 0.53582716 0.33422 1.07584 0.43685 0.97168  
0.99276815 0.65738576 0.9339435 0.65531183 0.79364631 0.30291 1.09642 0.97377 0.47415  
0.374601617 1.24895018 0.54197292 0.75428476 0.47651 0.87083 0.33066 1.27659  
0.878526693 0.42940153 1.06579002 0.81516013 0.60168894 0.09634 1.5981 0.22953 0.73513

1.10791474 0.72584814 0.78278588 0.54954165 0.7541098 0.784 0.47372 0.46077 0.94618  
0.094689469 1.53078543 0.24686881 1.33528667 0.1536 1.48023 0.08569 1.43337



0.178183818 1.22013587 0.07866619 1.57193865 0.42855 0.9459 0.23575 1.24156  
0.17773508 1.92858144 0.07146494 1.901896 0.01146994 0.00962836 2.39367209 0.88236 0.34544  
0.033595632 2.15638851 0.00962836 2.39367209 0.45489 0.88381  
0.51396047 0.72392163 0.13390223 1.644157 0.50332 0.72392  
0.31390223 1.644157 0.6502373 1.94516511 0.4861 0.88025 0.27306 1.60416  
1.23170958 0.560601651 0.98062835 0.81135319 0.61306753 0.89531 0.62969 0.30324 1.10254  
0.89266243 0.441378193 1.04770471 0.65512811 0.70111477 0.37411 1.07839 0.48785 0.90906

1.35964564 0.27813959 1.16144021 0.13121444 1.47359278 0.22549 1.26589 0.84046 0.632  
0.026844729 4.14649991 0.02489926 4.74089877 0.01143 3.5966  
0.264048328 1.15434851 0.11999215 1.46409207 0.81048 0.6741 0.2586 1.18952  
0.184336196 1.4033791 0.052373 1.94516511 0.4861 0.88025 0.44062 0.93238  
0.424760336 1.06395732 0.12968042 1.62419429 0.77251 0.56815 0.42566 0.94181

1.28596651 0.74221756 0.80869334 0.81135319 0.61306753 0.43385 0.96427 0.97904 0.43272  
0.80756626 0.508840105 1.00160633 0.12578006 1.7971246 0.69723 0.78785 0.19082 1.32225  
1.10159196 0.321395345 1.19102223 0.59704678 0.66638026 0.40014 1.08838 0.15182 2.26436  
0.085233354 5.33596235 0.0506 5.33596

0.82925825 0.23866404 1.42153497 0.15952085 1.53224864 0.60013 0.72106 0.50158 0.89808  
1.54793362 0.465489133 0.10593114 0.35030328 0.11919061 0.63876 0.78191 0.62669 0.74431  
2.1409886 0.505108209 1.00104645 0.07194219 1.50290531 0.69131 0.81246 0.40973 0.98617  
0.172331654 1.66374965 0.12578006 1.7971246 0.36688 1.37679 0.41747 0.42447  
0.020312952 4.72994422 0.00750629 4.72994422

1.23452637 0.491734816 1.00535885 0.13121444 1.47359278 0.41551 1.00437 0.36188 1.04797  
0.72296047 0.610888129 0.6632929 0.161666 0.66329  
2.45391454 0.00202363 2.6356486 0.07282489 0.81485705 0.00124 0.37449 0.0451 3.11029  
0.49066207 0.351662031 1.22114333 0.66411489 0.69939358 0.54471 0.79494 0.26495 1.32575  
0.83318052 0.392098084 1.00132894 0.36439844 1.00130307 0.40382 1.05288 0.35234 1.22714  
0.444764152 1.16393884 0.44521972 0.88053313 0.252559 2.28594 0.65253 0.51198  
0.254539182 1.43293803 0.55923848 0.70927626 0.31383 1.3252 0.2241 1.74099  
0.359414626 1.48258971 0.0870078 1.4825897 0.32437 1.48259  
0.9931039 0.231780057 1.41357268 0.08580389 2.3178836 0.2729 1.43884 0.79809 0.47207  
0.88642294 0.68026338 0.65015 0.81148 0.88795 0.61978

1.47198654 0.91987188 0.64040416 0.66697 0.74801 0.89899 0.6072  
1.14198293 0.93273154 0.69467871 0.67985697 0.79163444 0.90767 0.67103 0.84929 0.68144  
1.11040028 0.431144248 1.05115118 0.46428416 0.84912614 0.76241 0.73292 0.36758 1.07687  
0.381347892 1.41141445 0.5045145 0.73929625 0.60847 0.59558 0.27801 0.81618  
0.68810787 0.633321428 0.94265423 0.57148128 0.79130312 0.88871 0.63627 0.19491 0.71468  
1.55928884 0.746855586 0.91173928 0.26340544 1.09295212 0.9848 0.42775 0.96173 0.53482  
0.132732087 1.51136177 0.09015962 1.79324714 0.29087 1.27238

1.45173994 0.6473395 0.88973745 0.97694578 0.35754936 0.30207 1.21627 0.20036 1.95571

0.97584417 0.90992289 0.59159377 0.71546646 0.67540472 0.80809 0.61553 0.87956 0.52218  
0.08035704 4.2325631 0.04935606 4.2325631 0.00212 0.37449 0.0451 3.11029  
0.143614969 1.25313751 0.05791778 1.84954622 0.34968 1.10742 0.29859 1.17018  
0.98793747 0.621349062 0.95767132 0.64168263 0.76601108 0.34543 1.05836 0.9653 0.50333  
0.97324985 0.633812963 0.98261294 0.3776116 0.98616646 0.73168 0.73321 0.53771 0.87018  
1.15351592 0.775475947 0.70808376 0.43104211 1.03874962 0.1805701 1.34625046 0.07026 2.90274

0.99056815 0.283071311 1.12892073 0.33446681 1.07917485 0.64052 0.85933 0.13204 2.08233  
0.261328822 1.91803322 0.50782952 0.71089291 0.29248 2.05069 0.34504 1.22439

0.9244684 0.398611926 1.02302108 0.49613511 0.79694066 0.41206 1.02079 0.40067 1.02568  
0.04491812 4.11370274 0.02151388 4.11370274 0.01544 2.81552 0.43713 0.96446  
0.203703071 1.7620198 0.2355413 1.25670091 0.29248 2.05069 0.34504 1.22439  
0.22570599 1.27269004

0.84103477 0.42916583 1.0052297 0.59321283 0.78041511 0.66639 0.64184 0.39911 1.00531  
1.33839994 0.77003895 1.7532984 0.0778267 0.43393084 0.99741 0.82034 0.1991 0.63044  
1.87789713 0.381801347 1.02383889 0.38451936 0.98035225 0.31778 1.07877 0.00587 2.2861  
0.92644684 0.438851878 1.10364243 0.62769193 0.50296311 0.39682 1.86403 0.39682 1.86403  
0.33588559 1.11396534 0.54543225 0.83907148 0.54594 0.8884 0.27878 1.13108

1.32169760 0.004102262 1.93140554 0.4788 0.9637 0.0028 2.27915  
0.61601389 0.663591123 0.83049248 0.46412 0.95792 0.75267 0.67832  
2.03620567 1.03555E-05 0.00621199 3.2E-05 3.4511 0.00888 2.65511 0.10293 3.34127  
0.14651655 3.34127032

1.84250906 0.43104211 1.03874962 0.44259681 0.8955117 0.3925 1.04592 0.00888 2.65511  
0.09455185 1.45484329 0.18070311 1.34625046 0.07026 2.90274 0.24403 1.32981

1.11607129 0.444038648 1.02601869 0.65714568 0.61562282 0.40205 1.02388 0.55394 0.60342  
1.1667105 1.35628346 1.2505575 0.24694844 1.1323413 0.22501 1.79905 0.03792 2.78251

1.47512828 0.595905719 0.78692318 0.43367298 0.55488321 0.58724 0.76188 0.47464 0.90027  
0.531114971 0.34712792 0.1528587 1.37447028 0.71951 0.7154 0.49927 0.72376  
0.78778979 0.308435305 1.18633688 0.1528587 1.37447028 0.71951 0.7154 0.49927 0.72376  
0.74284435 0.073446214 1.40108301 0.0456064 1.52448404 0.63821 0.85055 0.10866 1.68433  
0.93805154 0.910678227 0.36279574 0.47298635 0.78514174 0.72188 0.55132 0.94024 2.5014  
0.643631423 0.83371663 0.73112332 0.52519845 0.51595 0.75889 0.44365 0.93049  
0.62137438 0.87788594 0.66267548 0.56752049 0.43345 0.92427 0.43098 0.86193  
1.36866756 0.311372989 1.09641641 0.3091497 1.08302066 0.51992 0.9195 0.3204 1.29292  
0.94724972 0.69589068 0.79585413 0.76230035 0.61723156 0.53174 0.88994 0.43854 0.91838  
0.9902061 0.559666035 0.8462962 0.50631021 0.80034746 0.45404 0.86361 0.53711 0.77494  
0.929977634 0.12637593 0.99991351 0.03426471 0.37104 1.50255  
1.04561306 0.594526543 0.8947908 0.41071418 0.89588805 0.53672 0.81306 0.4747 0.91773  
0.558701472 0.2894716 0.5558 0.28947

0.88025739 0.5638088 0.86501542 0.43906095 0.86501542 0.59461 0.80499 0.43463 0.71672  
1.39936264 0.696241827 0.73928554 0.69240001 0.70668775 0.59461 0.80499 0.43463 0.71672  
0.66921988 0.46618105 0.53991842 0.78101016 0.69722 0.36213 0.53718 0.77922  
0.695251932 0.43492354 0.70440024 0.43676253 0.4292 0.41674  
0.386828659 1.10450011 0.5035 0.81125 0.39679 1.04549  
0.582949736 0.93766733 0.41577 0.93767

0.9559837 0.579549911 0.87568345 0.54814 0.83376 0.45102 0.89218  
0.215502278 1.23561113 0.31383738 1.23010724 0.23275 1.2529 0.33951 1.20661  
0.96175853 0.42772096 1.05959647 0.46557916 0.6085022 0.55836 0.56763 0.74031 1.07481  
1.01206353 0.627959437 0.67092179 0.61327247 0.6615524 0.42177 0.67262 0.51674 0.79981  
1.15381058 0.467863528 1.01967932 0.60393153 0.77558865 0.41722 1.03325 0.60056 0.72908

1.18010772 0.637786478 0.86158238 0.54615731 0.78298235 0.7133 0.61719 0.45124 0.94448  
0.6147102321 0.61484423 0.71826913 0.1940302 0.89681863 0.5891 0.75447 0.53624 0.57254  
1.02454549 0.697077214 0.49887697 0.46570423 0.89400488 0.71733 0.62099 0.58562 0.73707

0.93920412 0.311712879 1.17218486 0.45006121 0.83163541 0.34794 1.12125 0.24866 1.53292  
0.727069583 0.71784429 0.54796316 0.75541098 0.70985 0.71948 0.64394 0.70794  
0.599318812 0.31845415 0.0338 0.31805 0.60338 0.31805 0.23732 1.25107  
0.451276147 1.08586027 0.74952004 0.41513903 0.49155 0.67025 0.2411 1.19207  
1.03430595 0.07754622 1.34183678 0.22122755 1.3511189 0.06299 1.59056 0.2411 1.19207  
0.56032146 0.87462976 0.56032146 0.87462976 0.41884 0.87463  
0.4642254 1.58863657 0.29235 1.63259 0.46817 0.68429  
0.40164104 0.378771928 1.12378007 0.684684 0.59824 0.73686 0.50989  
1.31776599 0.771401899 0.64712454 0.58777789 0.64760371 0.61919 0.74094 0.77853 0.61117

|            |             |             |             |            |         |         |         |
|------------|-------------|-------------|-------------|------------|---------|---------|---------|
|            | 0.30989895  | 1.8235445   |             |            |         | 0.24955 | 1.82354 |
|            | 0.51055266  | 1.00069274  |             |            | 0.4301  | 0.97125 | 0.29849 |
| 0.8309087  | 0.80388814  | 0.606584    | 0.55242713  | 0.74526618 | 0.81807 | 0.60554 | 0.63012 |
| 0.76313454 | 0.67152075  | 0.753084    | 0.4386475   | 0.89027464 | 0.71949 | 0.58584 | 0.49532 |
| 0.82655227 | 0.21687414  | 1.184517    | 0.05494201  | 1.53528265 | 0.17471 | 1.33762 | 0.91239 |
| 0.86041508 | 0.88525633  | 0.63433181  | 0.61034809  | 0.72242107 | 0.97192 | 0.52992 | 0.35668 |
| 0.73549623 | 0.694921492 | 0.56331049  | 0.71142378  | 0.49719793 | 0.53026 | 0.48265 | 0.57214 |
| 0.94248564 | 0.322488267 | 1.17842033  | 0.50006179  | 0.8783586  | 0.22218 | 1.26963 | 0.62854 |
| 0.45242213 | 0.9856205   | 0.60838487  | 0.84979576  | 0.68113575 | 0.95285 | 0.61421 | 0.95129 |
| 0.72762897 | 0.739031002 | 0.74948443  | 0.63661386  | 0.63890753 | 0.75788 | 0.67981 | 0.4356  |
| 1.03831607 | 0.648036256 | 0.67179457  | 0.6654648   | 0.62112062 | 0.52705 | 0.8589  | 0.52106 |
|            | 0.434931361 | 1.02244701  |             |            | 0.41109 | 1.02245 |         |
|            | 0.581360543 | 0.99810507  | 0.55064582  | 0.72319875 | 0.41837 | 0.99812 | 0.61664 |
|            | 0.44492939  | 1.07613579  | 0.54877878  | 0.62028326 | 0.36779 | 1.16012 | 0.43593 |
|            | 0.417451396 | 1.50372494  |             |            | 0.48406 | 0.92748 | 0.40081 |
| 1.50811497 | 0.696323478 | 0.95695845  | 0.81574906  | 0.56681875 | 0.90255 | 0.60407 | 0.41776 |
| 1.1019699  | 0.035573037 | 1.3651969   | 0.05577779  | 1.48898869 | 0.08407 | 1.36462 | 0.2489  |
| 0.6809303  | 0.765358645 | 0.65005981  | 0.63221283  | 0.73587264 | 0.47869 | 0.93888 | 0.80947 |
| 1.09594858 | 0.80314693  | 0.84001263  | 0.91201769  | 0.58112007 | 0.96878 | 0.56231 | 1.14056 |
| 1.08485052 | 0.620111119 | 0.95343225  | 0.69371699  | 0.73459922 | 0.92483 | 0.67645 | 0.31335 |
| 0.73764389 | 0.609418051 | 0.93945134  | 0.3899106   | 0.94195313 | 0.49105 | 0.86105 | 0.42207 |
| 0.88568348 | 0.003026394 | 1.663498    | 0.01011304  | 1.88591925 | 0.01185 | 1.73128 | 0.18213 |
| 1.38051567 | 0.608067406 | 0.82646052  | 0.88306326  | 0.28384734 | 0.28051 | 1.63424 | 0.28051 |
|            | 0.00289937  | 1.95753033  | 0.01784576  | 1.80918205 | 0.00498 | 2.18152 | 0.44815 |
| 1.05973988 | 0.353357016 | 1.03566737  | 0.33877807  | 1.03251923 | 0.71104 | 0.78884 | 0.21276 |
| 1.31047011 | 0.732767084 | 0.91182948  | 0.7913203   | 0.6531528  | 0.97741 | 0.64776 | 0.32267 |
|            | 0.608628737 | 0.91929809  | 0.38574688  | 0.91929809 |         |         |         |
| 0.70562243 | 0.660868916 | 0.91164483  | 0.60177337  | 0.82573194 | 0.41957 | 0.95449 | 0.71401 |
| 0.83527916 | 0.421804198 | 1.06707329  | 0.54072821  | 0.64791502 | 0.39315 | 1.06911 | 0.49047 |
| 0.86099572 | 0.12526644  | 1.22523977  | 0.2010412   | 1.53598818 | 0.01858 | 2.03886 | 0.81539 |
|            | 0.21789354  | 1.76091136  | 0.52845399  | 0.84407042 | 0.56454 | 0.82077 | 0.1155  |
| 1.07421254 | 0.858883889 | 0.75793451  | 0.68252288  | 0.78549902 | 0.95612 | 0.59978 | 0.28776 |
| 1.04209159 | 0.269300188 | 1.36248791  | 0.48674713  | 0.86582565 | 0.18606 | 1.47022 | 0.62238 |
|            | 0.90060457  | 0.91278265  | 0.55564877  | 0.79302683 | 0.51265 | 0.91898 | 0.46561 |
| 0.94677306 | 0.608766573 | 0.9671785   | 0.52726397  | 0.69835175 | 0.67963 | 0.70572 | 0.41281 |
| 1.29929458 | 0.659688006 | 0.70193121  | 0.59311806  | 0.70645088 | 0.63697 | 0.69737 | 0.43841 |
| 0.71928036 | 0.249863    | 1.23882847  | 0.54063972  | 0.78208671 | 0.18479 | 1.27057 | 0.57893 |
| 0.7811362  | 0.775791175 | 0.88112068  | 0.2190091   | 1.13929719 | 0.99941 | 0.36248 | 0.51331 |
| 1.27748464 | 0.071825246 | 1.62357255  | 0.0849232   | 1.58303347 | 0.18599 | 2.74521 | 0.22097 |
| 0.73156522 | 0.47214368  | 1.02852858  | 0.90410989  | 0.6369109  | 0.04987 | 1.67469 | 0.68407 |
| 0.90021936 | 0.3389478   | 0.78269604  | 0.63909676  | 0.71557609 | 0.26243 | 1.15609 | 0.38221 |
| 1.20334338 | 0.170488542 | 1.20560947  | 0.10017636  | 1.37563195 | 0.18155 | 1.23212 | 0.89646 |
| 1.15021418 | 0.68181846  | 0.55071364  | 0.62229648  | 0.58750073 | 0.64549 | 0.51343 | 0.53577 |
| 0.80784976 | 0.276540508 | 1.20692309  | 0.62192022  | 0.78848179 | 0.58174 | 0.87505 | 0.14148 |
| 0.61330933 | 0.625292673 | 0.67750628  | 0.6231674   | 0.65015279 | 0.45863 | 0.54972 | 0.45384 |
| 2.10544096 | 0.36308245  | 1.24271713  | 0.79446024  | 0.50450112 | 0.59631 | 0.66419 | 0.96685 |
| 1.16851697 | 0.906967724 | 0.49445424  | 0.78857057  | 0.73517172 | 0.91306 | 0.66372 | 0.57518 |
|            | 0.441138023 | 1.46854749  |             |            | 0.46133 | 0.87179 | 0.25137 |
| 0.82177694 | 0.594061204 | 0.93675384  | 0.40551694  | 0.93826518 | 0.47691 | 0.83343 | 0.53451 |
| 0.80407061 | 0.528538879 | 0.97713106  | 0.57610933  | 0.67203624 | 0.7739  | 0.60781 | 0.23502 |
| 0.99919604 | 0.427702965 | 1.0020935   | 0.52345704  | 0.57578521 | 0.44365 | 0.59446 | 0.40258 |
|            | 0.888751859 | 0.47408372  |             |            | 0.91878 | 0.47408 | 1.0021  |
| 0.85241819 | 0.464591194 | 1.06795713  | 0.55899648  | 0.78516061 | 0.81633 | 0.3605  | 0.25443 |
| 0.89320074 | 0.881697749 | 0.65951237  | 0.54903425  | 0.87099487 | 0.62408 | 0.86276 | 0.94373 |
|            | 0.367643134 | 1.12447035  | 0.29708822  | 1.17407015 | 0.44799 | 0.91821 |         |
| 2.18791826 | 7.20457E-05 | 2.52944191  | 0.00378344  | 2.42314581 | 0.00076 | 2.57474 | 0.04274 |
| 0.96065291 | 0.44428553  | 1.04160483  | 0.60175633  | 0.61470086 | 0.6467  | 0.58744 | 0.38775 |
| 1.49568392 | 0.938079399 | 0.51335773  | 0.95410653  | 0.36535236 | 0.78851 | 0.63388 | 0.67343 |
| 1.1734138  | 0.589611874 | 0.95477332  | 0.41274504  | 0.95657858 | 0.53753 | 0.88756 | 0.5172  |
| 0.67097163 | 0.587767554 | 0.77519174  | 0.55459684  | 0.49801434 | 0.48449 | 0.86837 | 0.42662 |
| 1.19286233 | 0.588717422 | 0.90080238  | 0.46376613  | 0.86289575 | 0.71258 | 0.71987 | 0.34234 |
| 0.80968361 | 0.849280344 | 0.69570073  | 0.79767877  | 0.64042502 | 0.65522 | 0.7985  | 0.78512 |
| 0.79909854 | 0.572112463 | 0.78279345  | 0.551172378 | 0.77843958 | 0.48552 | 0.89488 | 0.44785 |
| 1.33533335 | 0.219919182 | 1.18175073  | 0.47512125  | 0.89117823 | 0.25964 | 1.13083 | 0.16125 |
| 1.3625163  | 1.96572E-05 | 3.1412295   | 2.2298E-06  | 6.09619699 | 0.00581 | 2.32183 | 0.31006 |
|            | 0.470326757 | 1.04136209  | 0.91817838  | 0.46557427 | 0.21854 | 1.54691 | 0.15835 |
|            | 0.42478998  | 1.22170693  | 0.62162753  | 0.50490001 | 0.57725 | 0.63347 | 0.31076 |
| 1.15269469 | 0.3769799   | 1.10269727  | 0.30314747  | 1.13019035 | 0.16463 | 0.72197 | 0.16463 |
|            | 0.422001361 | 1.00828075  | 0.45083068  | 0.84402631 | 0.32877 | 1.35338 | 0.40278 |
| 1.08863828 | 0.79224077  | 0.85697939  | 0.42626405  | 0.95641723 | 0.99648 | 0.38327 | 0.174   |
| 0.92378947 | 0.615200388 | 0.99165874  | 0.3709648   | 0.99106584 | 0.28685 | 1.26479 | 0.42983 |
| 1.29789566 | 0.198176375 | 1.22204474  | 0.2585607   | 1.22446289 | 0.06501 | 1.41384 | 0.81438 |
|            | 0.596142167 | 0.58779131  | 0.5996661   | 0.58779131 |         |         |         |
| 0.9065789  | 0.429084228 | 1.05499133  | 0.56732023  | 0.3789027  | 0.65028 | 0.49583 | 0.34327 |
| 0.88205618 | 0.770748376 | 0.89965039  | 0.21961017  | 1.12238147 | 0.99193 | 0.4789  | 0.93225 |
| 0.76891413 | 0.001571201 | 1.49647687  | 4.5731E-05  | 3.88345764 | 0.0045  | 2.04591 | 0.31337 |
|            | 0.759722887 | 0.74531335  | 0.9986846   | 0.33840053 | 0.53181 | 0.89845 | 0.07044 |
|            | 0.810130452 | 0.50952195  | 0.83518745  | 0.40429573 | 0.66209 | 0.6612  | 0.50682 |
|            | 0.452916018 | 1.06662014  | 0.63046678  | 0.57619618 | 0.64351 | 0.63385 | 0.3488  |
|            | 0.511449028 | 0.99757968  | 0.78432571  | 0.45637057 | 0.70648 | 0.67665 | 0.3564  |
| 0.99898206 | 0.446322526 | 1.00463355  | 0.73738367  | 0.74239868 | 0.41014 | 1.00553 | 0.42027 |
|            | 0.324855223 | 1.511740577 | 0.49467892  | 0.7511966  |         |         | 0.28577 |
| 0.84013556 | 0.43089924  | 0.94999589  |             |            | 0.64875 | 0.52554 | 0.41619 |
| 0.68617151 | 0.421772164 | 1.0464691   | 0.41529805  | 0.84444982 | 0.54863 | 0.87111 | 0.36637 |
|            | 0.340258024 | 1.5229404   |             |            | 0.31437 | 1.27415 | 0.1181  |
| 0.90637029 | 0.669034938 | 0.63586319  | 0.51564917  | 0.84172173 | 0.6834  | 0.62405 | 0.53017 |
|            | 0.612845516 | 0.55773985  | 0.4859635   | 0.76237383 | 0.58935 | 0.57761 | 0.58222 |

1.00295522 0.508610483 1.00240389 0.71363103 0.61341290 0.32221 1.2404 0.4348 0.91793  
1.13585007 0.639993261 0.90824933 0.66661108 0.73657191 0.88037 0.64708 0.19816 1.38093  
2.47871322 0.628592588 0.95344271 0.7537888 0.71401289 0.44511 0.98213 0.67919 0.70536  
1.19291237 0.606253903 0.96562292 0.96511298 0.47967965 0.00917 0.82807 0.00902 1.93274  
0.550023899 0.90732438 0.73674422 0.4104042 0.57198 0.7298 0.28582 2.1425  
0.42487335 0.402175484 1.05825507 0.54395282 0.8641003 0.30694 1.09484 0.81475 0.40323  
1.01353713 0.117204576 1.31892058 0.18608684 1.23001494 0.1054 1.40006 0.52485 0.61746  
0.79048976 0.612401537 0.94657165 0.82618863 0.65986303 0.88826 0.45003 0.36782 1.04248  
0.620005273 0.01890388 0.620005273 0.01890388 0.620005273 0.01890388 0.44149 0.81776 0.41798 0.92469  
0.692591412 0.67279687 0.7965433 0.31415654 0.11683 1.28126 0.84593 0.666  
0.82498423 0.538518632 0.99527387 0.38917176 0.98269654 0.11683 1.28126 0.84593 0.666  
0.43421086 0.987888619 0.07945237 0.09545025 0.07945237 0.09545025 0.65763 0.74856 0.39757 1.06399  
4895401 0.640235701 0.88313562 0.75307777 0.61321883 0.81384 0.65928 0.17766 1.6753  
0.58147795 0.359012446 1.11119224 0.31464988 1.11863713 0.58526 0.51667 0.45662 0.531108  
0.47071017 0.807118517 0.5838077 0.83322429 0.5847566 0.83322429 0.47259 0.70743 0.2883 0.55049  
0.82530563 0.171084623 1.12630468 0.09186714 1.35640704 0.42259 0.70743 0.2883 0.55049  
0.75575727 0.696776248 0.46123237 0.7159135 0.46608078 0.6836 0.6464 0.40723 0.86084  
0.857726053 0.85721304 0.65497484 0.49056497 0.68479 0.67484 0.87143 0.64114  
0.13747145 2.15785206 0.49733824 0.73173632 0.08174 2.30952 0.58601 0.55816  
0.481743463 1.06324182 0.55595156 0.68849925 0.33318 1.22242 0.71457 0.54726  
1.00388525 0.652707272 0.52752396 0.66536673 0.52765721 0.33318 1.22242 0.71457 0.54726  
0.521229728 0.52834454 0.5404602 0.75169319 0.45807 0.96576 0.48817 0.52834  
1.18122669 0.569748278 0.96391065 0.5640402 0.75169319 0.45807 0.96576 0.48817 0.52834  
0.68636687 0.98514577 0.40386233 0.74030839 0.67540472 0.55624 0.86205 0.99793 0.24535  
0.74313254 0.449752944 1.05734526 0.43227194 0.85986239 0.3937 1.09307 0.42737 0.42126  
1.07348711 0.173561328 1.32256694 0.11747412 1.54181643 0.35952 1.14277 0.39224 1.3209  
0.427774531 1.6191143 0.52725515 0.73853339 0.85273 0.54764 0.40281 1.61911  
0.9620931 0.81991941 0.56651391 0.58752515 0.73853339 0.85273 0.54764 0.40281 1.61911  
1.60206975 0.221289443 1.12211053 0.32504535 1.06571141 0.24957 1.22248 0.13429 1.82101  
1.14612724 0.793290196 0.89488802 0.6569333 0.73250278 0.9822 0.4665 0.42732 0.97688  
0.547407294 0.41643487 0.547407294 0.41643487 0.547407294 0.41643487 0.54255 0.416474  
1.85289682 0.57674488 0.92788562 0.60812119 0.60243094 0.44473 0.94662 0.49102 0.82993  
0.538372273 0.99202026 0.38565356 0.97018884 0.21557 1.34774 0.44973 0.82993  
0.987246936 0.25070324 0.58096266 0.72028865 0.64479 0.43834 0.53846 0.58957  
0.514705237 0.7335747 0.55037712 0.77972034 0.50169 0.84232 0.59974 0.63388  
1.17890013 0.232514128 1.5850131 0.16073372 1.30550131 0.81109 0.7538 0.23534 1.35419  
1.44087389 0.701777281 0.66605405 0.61695509 0.58760636 0.68611 0.60904 0.59141 0.77508  
0.71503286 0.740339024 0.87132347 0.66444563 0.71007508 0.89334 0.33594 0.43399 0.96518  
0.656615667 0.899449384 0.549849874 0.61745738 0.49375066 0.91448 0.44885 0.70747 0.62709  
0.727267344 0.52049526 0.72317803 0.45175977 0.727267344 0.52049526 0.64027 0.66635  
1.16995513 0.458346993 1.01517245 0.71181171 0.78752445 0.14359 1.27261 0.42137 0.97825  
1.23020381 0.101495478 1.37059885 0.05804734 1.82812604 0.18449 1.29253 0.45866 0.94579  
1.718461087 0.385760409 1.04989878 0.6523258 1.49982555 0.41374 1.00292 0.07325 1.58113  
0.90313168 0.744176379 0.70588551 0.65483569 0.71824902 0.55619 0.86373 0.7425 0.63688  
0.639035099 0.36787488 0.639035099 0.36787488 0.639035099 0.36787488 0.64963 0.36787  
1.05802514 0.615948635 0.789288174 0.59711251 0.75137096 0.56225 0.44208 0.45346 0.87527  
1.00288661 0.811898919 0.56408396 0.69035987 0.61968388 0.81328 0.52206 0.46935 0.80369  
1.79195851 0.29853825 1.32915245 0.1824641 1.50940777 0.77439 0.6944 0.78231 0.29575  
0.66991265 0.773109355 0.70247802 0.49099709 0.85882951 0.77439 0.6944 0.60503 0.72476  
0.666838227 0.83272098 0.41518839 0.91549366 0.521356 0.83643 0.75396 0.51997  
1.24695225 0.827543386 0.61853529 0.51927568 0.74098556 0.81819 0.56442 0.72823 0.67838  
0.752284367 0.69498803 0.62790484 0.67415773 0.72994 0.678 0.63147 0.74719  
1.4652466 0.58237994 0.49500891 0.5170197 0.8743271 0.70966 0.47797 0.40471 0.90992  
1.19180065 0.738098288 0.75882865 0.70881246 0.65621495 0.4573 0.93834 0.74163 0.64716  
1.16881368 0.585867036 0.98719942 0.37626876 0.88150065 0.26244 1.23394 0.48952 0.69538  
0.40009996 0.884474944 0.51581597 0.57703116 0.80991377 0.4769 0.85766 0.92687 0.44922  
1.09614436 0.716611906 0.40207617 0.71194165 0.38613788 0.62233 0.44242 0.62233 0.44242  
3.82854093 0.63401325 0.87178924 0.41320544 0.9132423 0.65495 0.51115 0.6852 0.80819  
0.89634883 0.66204371 0.37927023 0.73594661 0.70435097 0.41713 0.94429 0.76223 0.37937  
0.89365003 0.88619982 0.60843621 0.92272873 0.57526218 0.601 0.88243 0.8315 0.82701  
0.8306564 0.31436877 1.10382514 0.49203025 0.91445284 0.26974 1.10669 0.57923 0.57888  
0.649198489 0.92732963 0.636442921 0.60665022 0.42673 0.96495 0.84841 0.43648  
0.565239669 0.5820123 0.565239669 0.5820123 0.565239669 0.5820123 0.56346 0.58201  
0.017334539 2.14515599 0.03241789 2.3032998 0.03241789 2.3032998 0.03241789 2.3032998  
0.61019666 0.778046698 0.60857828 0.73543852 0.55073375 0.62695 0.7521 0.72508 0.46945  
0.54017343 0.018636137 1.64736348 0.01922911 1.92693733 0.15294 1.4356 0.13527 1.53662  
1.02638076 0.56543922 0.97414662 0.65849647 0.74424124 0.82253 0.6826 0.36893 1.06334  
1.07424191 0.68052909 0.49500891 0.62051128 0.7282055 0.65367 0.58881 0.2712 0.7742  
1.19714457 0.854396166 0.74800613 0.82974661 0.67398049 0.66119 0.84145 0.764 0.727373  
0.78457273 0.56353041 0.98649388 0.36191774 1.0429444 0.73887 0.79526 0.9852 0.41734  
1.27530873 0.470716493 1.03185398 0.4665762 0.90428815 0.4305 0.87063 0.31913 1.18215  
1.49929484 0.394722216 1.00010668 0.36499695 1.00010652 0.37996 1.04587 0.41203 0.85722  
0.83999841 0.492583913 1.00940466 0.91502315 0.62993742 0.04304 1.50883 0.84102 0.69762  
0.73815383 0.801933371 0.61419811 0.59321685 0.66643703 0.82059 0.57828 0.60173 0.74219  
0.95201793 0.811862456 0.62288217 0.73149144 0.40884199 0.60197 0.75112 0.78355 0.55262  
0.721212978 0.85066611 0.69898404 0.69898404 0.69898404 0.69898404 0.94646 1.50218 0.2325 1.24655  
0.76754606 0.922132959 0.67567448 0.68845574 0.78814751 0.71724 0.78157 0.94959 0.55809  
1.22695082 0.80202245 0.66778927 0.67204789 0.71101453 0.82884 0.64891 0.51055 0.88892  
0.6729404 0.558175015 0.7820352 0.558175015 0.7820352 0.558175015 0.44462 0.78204  
1.584343318 0.98788914 0.63674924 0.63085883 0.42241 0.89905 0.58096 0.69777  
0.318143428 1.24847338 0.6449251 0.57578284 0.32881 1.31626 0.28066 1.31626  
0.045359718 1.37446229 0.01669798 1.91317112 0.17176 1.24074 0.30368 1.1754  
0.411282956 1.12678853 0.62421107 0.6258996 0.34385 1.18825 0.49673 0.78824  
0.52561194 0.65845267 0.65999541 0.62822932 0.66400482 0.61361 0.65428 0.46372 0.6622  
0.92033649 0.536230889 0.42353454 0.960757285 0.4511664 0.60943421 0.84199535 0.99885 0.3684 0.47057 0.42353  
0.963618099 0.25522979 0.94213924 0.21297748 0.95953 0.08154 0.4628 0.86418  
0.101270127 0.42012795 1.04270792 0.79556055 0.74944419 0.47028 0.54436 0.32834 1.07378  
0.79517383 0.795848162 0.65753018 0.7954424 0.53083073 0.694 0.73209 0.59372 0.74404  
1.37610012 0.394780818 1.04914398 0.34000284 1.05083741 0.394780818 1.04914398 0.34000284 1.05083741  
0.517692405 0.64330608 0.2679651 0.22060879 0.2129 1.35383 0.50768 0.64331  
0.145444856 1.32881852 0.2679651 0.22060879 0.2129 1.35383 0.17261 1.82845  
0.8544435 0.667821618 0.75288238 0.58830355 0.84774723 0.67283 0.76021 0.42724 0.58026  
0.92679678 0.51243032 0.99873899 0.85804594 0.28846955 0.25141 1.13326 0.38307 1.10811  
2.61336972 0.625071137 0.94523195 0.4869376 0.13388245 0.25141 1.13326 0.9825 0.45176  
1.69661098 0.222445514 1.3254563 0.27245373 1.24811177 0.21445 1.68151 0.50576 0.73528  
0.96628789 0.32897901 1.1268018 0.2583242 1.16146717 0.40969 1.29474 0.552 0.56079  
0.653063785 0.8538904 0.46021552 0.91205286 0.64937 0.84597 0.67094 0.68932  
0.42797 0.82791

0.84093114 0.531846039 0.99178939 0.479999 0.92315222 0.30514 1.07735 0.92438 0.59011

0.330907866 1.33265712 0.67507844 0.4732332 0.46022 0.89589 0.18339 1.78791

1.00025037 0.430783779 1.00972992 0.59220049 0.71489131 0.54927 0.71495 0.40316 1.00945

0.589110175 0.78028915 0.666051719 0.52783553 0.49257 0.11945 0.40856 0.78029

0.648424369 0.52623137 0.95562373 0.0508914 0.9907906 0.46426 0.73793

0.517472957 0.52403147 0.481832725 1.00308832 0.72432126 0.67230598 0.4123 1.008 0.94736 0.40079

0.930122727 0.19742675 0.9482603 0.18970465 0.61253 0.72724 0.68932 0.26173

0.83330468 0.47455714 0.85644947 0.64617953 0.16253 0.72724 0.48057 0.68419

1.18219664 0.48027795 1.03233197 0.72522286 0.71713778 0.58883 0.81778 0.20282 1.54647

1.19306381 0.627453797 0.98594209 0.61324568 0.76589194 0.89702 0.56724 0.41212 0.90097

0.44261422 1.05850072 0.64440012 0.57365549 0.51032 0.79154 0.3908 1.08276

0.95562373 0.0508914 0.9907906 0.46426 0.73793 0.49257 0.11945 0.40856 0.78029

0.94558064 0.760702638 0.73990376 0.76152474 0.62126631 0.67644 0.79682 0.44045 0.83785

1.05809967 0.769347085 0.61299964 0.66112048 0.60776208 0.69159 0.54501 0.70206 0.649

0.558039458 0.87877169 0.44497 0.87877 0.721616312 0.53387871 0.69197163 0.52049262 0.66223 0.52777 0.53869 0.64931

1.24924049 0.447151647 1.00110297 0.6786836 0.7028485 0.41581 1.00116 0.96024 0.42009

0.73367375 0.210245979 1.16223527 0.0717685 1.83426458 0.34118 1.07159 0.36706 1.33707

2.16655758 0.204017933 1.31815312 0.4705693 0.87141839 0.12184 1.60307 0.37979 1.12475

0.90497371 0.463761943 1.02053819 0.64697078 0.77488117 0.33602 1.00909 0.67322 0.77723

1.0426918 0.778598347 0.78406961 0.66557503 0.70063707 0.9072 0.60458 0.33121 1.23347

0.61196597 0.9144347 0.74063893 0.5508387 0.82019 0.62705 0.27179 1.27881

1.20587603 0.58366297 0.96107602 0.72671395 0.7378803 0.88441 0.6706 0.17159 1.27153

0.76298516 0.540484913 0.99508871 0.83199683 0.59222789 0.95224 0.55647 0.38995 1.01498

1.26369144 0.598240133 0.93636997 0.76172568 0.4147056 0.43749 0.95869 0.47642 0.87143

0.424305174 1.0224085 0.64440012 0.57365549 0.51032 0.79154 0.3908 1.08276

1.50670161 0.507879778 1.00109386 0.76444626 0.60031465 0.39286 1.03257 0.75926 0.66324

0.439935723 1.05251032 0.68941727 0.48261891 0.60978 0.64431 0.36556 1.08985

1.61127272 0.67128572 0.95541053 0.47385496 0.89799144 0.86588 0.65979 0.41517 0.97945

0.76823476 0.579158567 0.768383 0.46087796 0.81510185 0.42877 0.73931 0.18026 1.83209

0.51109926 0.22222333 1.31557239 0.65717351 0.6885272 0.24515 1.28999 0.01012 10.0498

0.28925595 3.46583473 0.09431269 4.19851702 0.00151 2.65739 0.18026 1.83209

0.72594925 0.86883846 0.63555448 0.98959926 0.58089444 0.65456 0.77463 0.52577 0.60322

1.2278654 0.365496215 1.01103636 0.35596462 1.01398435 0.538 0.86182 0.39988 1.00864

0.349987757 1.03506235 0.29567244 1.09662737 0.538 0.86182 0.38477 1.0232

0.97904505 0.436469924 1.03863418 0.46503946 0.91809211 0.72958 0.78395 0.28577 1.11648

1.40407893 0.37233878 1.04229233 0.33963712 1.04581888 0.51507 0.91223 0.46024 0.93728

0.78005257 0.36412169 1.17303325 0.37548001 0.71106765 0.27634 1.2578 0.43489 0.39535

1.21719208 0.129244602 1.2294068 0.22396552 1.14542588 0.49071 0.94778 0.08583 1.48997

0.89216527 0.72971189 0.6965352 0.5205163 0.81003498 0.7858 0.56286 0.4552 0.91099

1.14884616 0.59559232 0.9378881 0.37381385 0.4281197 0.83026 0.54727 0.60131 1.08539

0.65471657 0.61354954 0.78251469 0.66235235 0.79253412 0.49496 0.92267 0.43338 0.79298

0.82057782 0.594265235 0.99127078 0.66360969 0.67213265 0.57843 0.70868 0.40644 0.99162

0.73625107 0.587989109 0.9782443 0.587989109 0.9782443 0.41021 0.97582 0.41021 0.97582

0.82673641 0.65661556 0.75836224 0.64982864 0.68904 0.76188 0.84953 0.5406

0.81257882 0.591487609 0.96545117 0.9703829 0.53458786 0.61586 1.15963 0.4922 0.93627

1.72035587 0.57727916 0.95124799 0.78934035 0.65304689 0.62572 0.71915 0.13422 1.59797

1.06294247 0.611905976 0.82235196 0.37589483 0.52945976 0.55259 0.80345 0.43262 0.87952

0.756260405 0.35864043 0.78351181 0.35864043 0.35864043 0.51178 0.71411 0.51178 0.71411

1.0726727 0.484679953 1.00501 0.88364729 0.56478092 0.39629 1.01744 0.60828 0.81772

0.77861556 0.69700534 0.8037891 0.70792027 0.76980504 0.55041 0.91464 0.42022 0.5294

1.06254797 0.61872227 0.94096698 0.67676218 0.66761633 0.58405 0.82699 0.42054 0.96219

0.7230282 0.633909595 0.97034185 0.58888561 0.84423175 0.43699 0.98485 0.86459 0.5931

1.13338601 0.51123282 1.07798653 0.55809165 0.79681436 0.77725 0.69225 0.14373 1.56442

0.442147993 0.99514255 0.81451984 0.31480455 0.52378 0.72174 0.34118 1.27624

0.279740529 1.19657052 0.47999379 0.7685447 0.14201 2.09204 0.36149 1.1001

0.571091413 0.80843031 0.571091413 0.80843031 0.571091413 0.80843031 0.42967 0.80843

1.08179785 0.356442619 1.12664484 0.58019576 0.81483654 0.49851 0.92415 0.29703 1.15215

1.07843279 0.810262885 0.65404783 0.64889145 0.75802374 0.49532 0.9305 0.82968 0.57706

0.88604933 0.408471294 0.98981647 0.69588883 0.3464581 0.7383 0.64129 0.40607 0.99163

1.924054 0.90792431 0.63664076 0.53403169 0.87366307 0.79679 0.71755 0.91688 0.52911

1.1924054 0.702846108 0.65075237 0.72161213 0.61113761 0.49841 0.84102 0.43466 0.78675

0.81888738 0.984077266 0.56155146 0.5408497 0.88285479 0.93553 0.63575 0.984 0.43386

1.1258899 0.66800816 0.65639649 0.58618563 0.6594359 0.6641 0.65559 0.49981 0.81291

1.6267038 0.883301951 0.87044976 0.98266291 0.43527951 0.89999 0.20054 0.32354 1.0421

1.2161206 0.62245457 0.93144881 0.98113032 0.38569123 0.64865 0.8543 0.1236 1.41013

0.94911805 0.745692467 0.86334059 0.81694176 0.64894616 0.92436 0.59149 0.28815 1.16326

1.57988962 0.438346847 1.09828267 0.74734872 0.50691599 0.62748 0.75719 1.8576 1.68845

0.7889016 0.472875609 1.06221022 0.58047956 0.69974926 0.32471 1.32528 0.71012 0.47211

0.635462922 0.54679723 0.64473874 0.54588397 0.48421 0.60507 0.48421 0.60507

1.02000516 0.719787783 0.16318099 0.39043781 0.6774871 0.74202 0.16318 0.47071 0.67749

0.762054621 0.83424695 0.59105851 0.74552603 0.85205 0.61906 0.23367 1.62825

1.6267038 0.883301951 0.87044976 0.98266291 0.43527951 0.89999 0.20054 0.32354 1.0421

1.45940457 0.58888554 0.61114617 0.69496 0.61551 0.57407 0.56893 0.57407 0.56893

1.5651763 0.604129593 0.94008738 0.39100664 0.94008738 0.32577 1.30022 0.41467 0.96789

1.40600537 0.55840366 0.9798691 0.67232671 0.50499119 0.32577 1.30022 0.41467 0.96789

1.09593122 0.973361816 0.63817549 0.78181603 0.72344356 0.9691 0.57877 0.85445 0.67574

1.5028903 0.613607791 0.90969117 0.40838359 0.92142848 0.45205 0.91927 0.60392 0.64519

1.14820638 0.126025639 1.27249764 0.08562574 1.56203509 0.24282 1.18595 0.37651 1.13209

0.48890028 0.721058289 0.62988367 0.54129759 0.82189786 0.4742 0.85528 0.75377 0.58357

0.98959121 0.960531778 0.64473043 0.68258785 0.76984716 0.91292 0.65749 0.93207 0.58031

0.721319475 0.63969342 0.80880922 0.34634143 0.56554 0.68356 0.44014 0.87553

0.8794934 0.314464676 1.14266257 0.25343087 1.16419476 0.47432 0.91737 0.45648 0.89024

1.749177663 0.498741942 0.53140293 0.74038602 0.40427907 0.36492 1.21186 0.45183 0.80968

1.06131043 0.629391369 0.49742453 0.35727193 1.06342037 0.36492 1.21186 0.98626 0.38735

0.88565574 0.853639028 0.69007075 0.69319592 0.71820368 0.57397 0.89261 0.88548 0.59733

1.20926574 0.271109223 1.62743178 0.47601295 0.77003886 0.22648 1.81616 0.39951 1.35053

0.5667653 0.779228208 0.52682712 0.74618097 0.51327957 0.59383 0.56499 0.67571 0.56365

0.92803276 0.618767352 0.84869597 0.57465949 0.78417163 0.57404 0.86963 0.57777 0.85165

1.21548415 0.151997958 1.53708467 0.48648926 0.79425888 0.25141 1.33465 0.6119 1.9933

1.19079597 0.620782404 0.96971734 0.62910923 0.82079803 0.93549 0.55698 0.48495 1.03802

1.24498076 0.59782795 0.97737998 0.38268738 0.97280170 0.91603 0.449 0.1473 1.50114
0.24849143 0.44054928 1.11856031 0.43946146 0.83700945 0.48856 0.8541 0.37496 1.21489
0.82808451 0.62586444 0.97123251 0.62146016 0.70119427 0.58905 0.7562 0.48834 0.93707
1.48422152 0.18928309 1.08958994 0.02386419 1.77254324 0.38353 1.02745 0.25433 1.50114
1.85007018 0.465148954 1.02323787 0.94806612 0.52581184 0.18016 1.39303 0.29969 1.12257
0.97446372 0.59930848 0.96049825 0.75465659 0.67315166 0.90167 0.6191 0.29943 1.09747
0.75196665 0.69834715 0.82029304 0.47164829 0.86145213 0.37139 1.17066 0.88064 0.55056
2.31193136 0.000122548 1.95521795 0.0009256 2.35858869 0.00255 2.12815 0.05098 1.52965
0.93048887 0.18240831 1.25472324 0.07566116 1.81674965 0.34225 1.10315 0.40207 1.537
1.38840845 0.32440579 1.2287571 0.44856771 0.89383771 0.536 0.8607 0.43634 1.34029
0.69709031 0.946610615 0.538257 0.34848097 1.11650631 0.68273 0.73883 0.95369 0.45241
1.21426185 0.28632442 1.1402744 0.54808407 1.11650631 0.79384 0.71728 0.09196 1.46172
0.95387294 0.588396246 0.99857819 0.78452174 0.61782224 0.41872 0.99873 0.88954 0.58325
1.18425966 0.771325447 0.53821752 0.80732947 0.33408956 0.65026 0.64325 0.56549 0.77999
0.98154126 0.63891034 0.67203748 0.64688522 0.64410586 0.52944 0.75341 0.51349 0.76149
0.76723936 0.66342556 0.8416204 0.82153714 0.48363887 0.34143 1.22493 0.76577 0.5545
1.07783076 0.3055069 2.59725268 0.3055069 2.59725268 0.37283 1.03321 0.63719 0.8039
1.44376966 0.53749458 0.98640866 0.39879495 0.92407748 0.43882 0.95147 0.29926 1.32468
0.017288348 2.498253 0.05437825 2.37571629 0.09575 2.65033 0.07836 2.5712
1.01677326 0.587273653 0.68630853 0.52785062 0.7206735 0.58422 0.65752 0.52101 0.80156
2.59196669 0.025414213 1.12414959 0.20493388 1.30977186 0.11081 1.75739 0.07005 1.33642
1.17380794 0.697258283 0.72496207 0.7003497 0.73119264 0.49752 0.92551 0.40769 0.61732
0.16777988 0.36632495 1.1318292 0.7804265 0.98848492 0.35388 1.13224 0.25292 1.53466
1.02332966 0.623483273 0.94853594 0.623483273 0.94853594 0.61539 0.55614 0.40423 0.97588
1.45979878 0.07609068 1.49711492 0.01859616 2.41623934 0.3681 1.15712 0.27942 1.24598
1.02496274 0.82908629 0.59490856 0.5128873 0.72076524 0.63772 0.97649 0.63772 0.97649
1.17194489 0.635845252 0.86984008 0.4704225 0.69719975 0.56298 0.85131 0.44349 0.93681
1.14984722 0.690792284 0.61047949 0.53517928 0.70955041 0.48799 0.84936 0.70821 0.5993
1.01277571 0.854315211 0.64299888 0.56998825 0.7882477 0.78239 0.64514 0.8229 0.66217
0.8341182 0.722871446 0.81601698 0.64380401 0.74500774 0.2784 1.28479 0.98954 0.41514
1.67777988 0.126712456 1.15628294 0.06765916 1.4153197 0.27325 1.11721 0.30401 1.0829
1.129811585 0.712950531 0.848347868 0.78765244 0.6251088 0.94234 0.44844 0.12738 1.37485
1.04681072 0.042878196 1.34859332 0.0859649 1.39011855 0.07123 1.54839 0.21491 1.20312
0.91366916 0.45589498 1.0435843 0.6421801 0.75820443 0.77482 0.64452 0.22242 1.27589
0.77989617 0.071452727 1.36624951 0.07711712 1.42448095 0.12969 1.37522 0.58078 0.85557
1.30034001 0.824852263 0.62246095 0.52727481 0.78121829 0.86718 0.57381 0.55325 0.86999
0.9965247 0.638743048 0.79370909 0.45078647 0.84458033 0.64298 0.78188
0.88765872 0.52626886 0.99831207 0.90361272 0.5324088 0.40194 1.01265 0.90629 0.54789
2.25019057 0.21305764 0.2835767 0.35168425 1.16283986 0.1813 1.40873 0.53731 0.8855
0.82938146 0.450217862 1.0087386 0.41860981 0.92048164 0.41359 1.01073 0.63478 0.6312
1.14977912 0.447566676 1.04810417 0.73377583 0.62254871 0.67531 0.71697 0.26602 1.19526
1.03241773 0.41831795 1.05202163 0.47944638 0.87000232 0.77643 0.7417 0.23512 1.16379
0.8860389 0.66160377 0.94881116 0.64805791 0.64881865 0.8221 0.67191 0.42666 0.978
0.88741502 0.306422168 1.16850079 0.73866842 0.4529611 0.2424 1.44596 0.3104 1.15415
0.67470114 0.38250419 0.50636346 0.49391223 0.67470114 0.38250419 0.69093 0.38088
1.01394049 0.695103368 0.80963994 0.76433859 0.64955324 0.46794 0.95689 0.56373 0.85503
0.82986908 0.296352817 1.33998883 0.52765251 0.78541729 0.50408 0.87996 0.24992 1.3526
0.87865341 0.931393153 0.62678876 0.84434321 0.64240599 0.63555 0.78827 0.91887 0.56597
1.37846867 0.341637201 1.01065365 0.35437894 1.00781462 0.75289 0.79754 0.00635 2.02995
0.79739962 0.965806703 0.45850142 0.46093402 0.88652904 0.47371 0.94509 0.99 0.37911
1.52601887 7.44021E-05 2.25204347 0.0001977 4.33578257 0.02892 1.63685 0.00234 2.47096
0.65308231 0.87574597 0.92757722 0.53980617 0.25957 1.46923 0.24541 1.62082
0.22374376 1.3504983 0.22374376 1.3504983 0.22374376 1.3504983 0.22374376 1.3504983 0.22374376 1.3504983
0.428341895 0.07820255 0.78851562 0.49730926 0.35558 1.16596 0.32864 1.27226
1.2674602 0.451324909 1.01890231 0.72178614 0.4397804 0.69554 0.63409 0.38788 1.03107
1.82054376 0.65905209 0.51873584 0.67381387 0.5107174 0.50373 0.79703 0.50971 0.8136
1.20548864 0.470847688 1.02904731 0.80312049 0.35747899 0.50749 0.75156 0.38369 1.07573
0.945867002 0.41045364 0.98988504 0.29606667 0.98988504 0.29606667 0.23656 2.39639
0.549973193 0.94855869 0.79641412 0.53755822 0.28509 1.40671 0.41075 0.55303
1.00644449 0.149233104 1.25140478 0.26475168 1.14396737 0.53166 0.8842 0.08454 1.58737
1.12806618 0.619200816 0.87955299 0.66308583 0.54702467 0.43683 0.9335 0.41547 0.7391
2.17656702 0.51111102 1.00000439 0.75274506 0.68481844 0.75672 0.77511 0.32937 1.07083
0.450505792 0.99914289 0.57748865 0.65885024 0.58923 0.62197 0.38093 1.1871
0.78869991 0.47348685 1.00396151 0.76391186 0.63691683 0.40955 1.00824 0.83446 0.64158
1.07477339 0.505171139 1.00130541 0.38350209 0.96540856 0.69554 0.63409 0.38788 1.03107
0.864174972 0.77502483 0.94048883 0.49874872 0.19957 1.28947 0.97202 0.51406
0.655515095 0.71898952 0.72770138 0.4223243 0.84796297 0.29517471 0.44631 0.88649
0.817239052 0.29517471 0.84796297 0.29517471 0.58848591 0.64810554 0.49459 0.85849
1.11232367 0.92595826 0.59533945 0.67541874 0.7770702 0.49459 0.85849 0.95555 0.5262
0.78416805 0.515703531 0.99573102 0.78311264 0.46734606 0.2758 1.35381 0.42712 0.92036
1.10483327 0.381134289 1.09001632 0.63371156 0.58217878 0.55321 0.87895 0.31413 1.11844
1.0736768 0.29778088 1.18521262 0.72580806 0.66199765 0.616755 0.72563 0.12069 1.41888
2.42986978 0.026337349 1.39307596 0.03860296 1.7772631 0.26834 1.12266 0.01252 2.03249
0.516490017 0.75044673 0.50627136 0.75044673 0.516490017 0.75044673 0.0984 1.76832
1.26527312 0.257567703 1.33613708 0.6344871 0.66959170 0.63432 0.76695 0.0984 1.76832
1.14912578 0.42300208 1.06214312 0.4920639 0.75737954 0.80685 0.65377 0.22208 1.22309
1.24692812 0.98989794 0.96037677 0.39925247 0.94988044 0.23246 1.23386 0.90819 0.55022
1.8788852 0.79244955 0.59452328 0.75768792 0.46902511 0.73448 0.63244 0.58167 0.72879
1.28691310 0.462487564 1.00860349 0.45839367 0.82407127 0.40433 1.03086 0.42532 0.1847
0.82413719 0.70909207 0.5898991 0.84644124 0.34673696 0.29624 0.38089 0.29624 0.38089
1.39138817 0.964514804 0.69571788 0.42387781 0.95462111 0.94047 0.59152 0.96451 0.39647
1.0186664 0.66827889 0.91944487 0.65827909 0.79645709 0.97255 0.56302 0.14743 1.28082
2.60173971 0.002144289 2.90209629 0.01495308 2.86048008 0.09194 2.71334 0.01297 0.33553
0.459972062 1.00969608 0.87621903 0.39164151 0.4038 1.01577 0.54933 0.319





0.5568849 0.797856459 0.92260858 0.3025657 1.04816148 0.99974 0.31166 0.98932 0.44022  
0.357861197 1.05965293 0.34286337 1.05275042 0.66604 0.80873 0.31676 1.6415  
1.19783438 0.981210871 0.50788609 0.45618491 0.92646315 0.66604 0.80873 0.99847 0.31078  
0.115700538 2.3870114 0.01561078 2.3870114 0.3474 1.2612 0.24191 1.43256  
1.32852122 0.24544821 1.35659974 0.502209331 1.0092043 0.39797 1.02288 0.83799 0.55391  
0.82191271 0.16847982 1.22398085 0.19324554 1.20057733 0.08614 1.70117 0.69166 0.77319  
0.8368956 0.71412217 0.9083801 0.40761137 0.90660408 0.67985 0.80399 0.79511 0.68207  
1.19240164 0.670306029 0.71441137 0.6133786 0.7081736 0.53118 0.744 0.59811 0.38663  
1.44103293 0.93293007 0.5913315 0.87944885 0.55628667 0.46566 0.95464 0.98811 0.38663  
1.20027963 0.71748168 1.0684604 0.86606136 0.54918824 0.64885 0.62139 0.43525 0.96834  
0.96276353 0.345882917 1.03743968 0.08370162 1.40953399 0.39353 1.02149 0.83013 0.66744  
1.16267539 0.501311813 1.00298794 0.28477295 1.06536405 0.74567 0.75154 0.88323 0.65041  
0.79641745 0.710712315 0.76431217 0.7244344 0.62085859 0.66181 0.731 0.4656 0.94008  
1.18792774 0.095878546 2.00461281 0.01231147 5.91807562 0.33968 1.21446 0.39686 1.21446  
1.28739729 0.155769192 1.28227837 0.19568919 1.42547183 0.20295 1.35138 0.30463 1.16865  
1.24671419 0.614626573 0.8329421 0.59846356 0.8275186 0.46604 0.90575 0.57719 0.72896  
0.314835293 1.22237072 0.27717484 1.22237072 0.27717484 0.27717484 0.27717484 0.27717484  
0.5925875 0.491441437 1.01360179 0.20154012 1.2529302 0.57433 0.85438 0.92069 0.46612  
0.096691958 1.4410041 0.05973719 3.14410041 0.05973719 3.14410041 0.05973719 3.14410041  
0.017702537 4.43075999 0.0624285 4.43075999 0.0624285 4.43075999 0.0624285 4.43075999  
0.538536979 0.60250239 0.349332 1.02883606 0.33585 1.12153 0.18025 1.47209  
1.48324466 0.4641811 0.70250767 0.56958585 0.82736386 0.66053 0.68182 0.52264 0.87848  
0.318964412 1.11249379 0.32505263 1.0990917 0.4905 0.7884 0.72408 0.58478  
0.50852529 0.226584622 1.45564007 0.08890591 1.80883168 0.49492 0.86974 0.5437 0.48627  
1.07755437 0.119494912 1.33350794 0.0154627 1.90739566 0.49492 0.86974 0.5437 0.48627  
1.56536429 0.58059932 0.64399103 0.42921919 0.78527149 0.51228 0.80478 0.58144 0.64399  
0.77326029 0.632565246 0.57803168 0.632565246 0.57803168 0.51228 0.80478 0.58144 0.64399  
0.92986663 0.52960757 0.99334501 0.20326211 1.21494488 0.31528 1.27649 0.41776 0.96455  
1.02524779 0.177915107 1.24296401 0.412507694 1.14851126 0.62219 1.30649 0.50333 0.90108  
0.743751412 0.88948977 0.73706729 0.74934396 0.47635 0.8794 0.15226 1.86046  
0.87970303 0.87238833 0.64571061 0.70195647 0.75497857 0.55587 0.90146 0.92514 0.66122  
0.996136745 0.996136745 0.2751875 0.996136745 0.2751875 0.996136745 0.2751875 0.996136745  
0.78279612 0.88273512 0.67923874 0.64055082 0.8117566 0.65094 0.84862 0.95192 0.4244  
1.26908511 0.0488169 1.41035753 0.08810774 1.4339515 0.00679 1.99464 0.83587 0.4793  
0.7079693 0.305149797 1.09815757 0.3219509 1.08148244 0.32007 1.15562 0.32007 1.15562  
0.8965935 0.65998483 0.9185735 0.6137957 0.82898337 0.16017 1.25942 0.98992 0.42136  
0.8965935 0.0737122 1.39646885 0.01958536 1.91268771 0.18917 1.37899 0.5173 0.47602  
0.395668864 1.19479309 0.395668864 1.19479309 0.395668864 1.19479309 0.395668864 1.19479309  
0.87562138 0.23085215 2.00749111 0.507113742 1.00472697 0.41155 1.00579 0.18531 2.00749  
1.28104888 0.532819517 0.96846371 0.53939394 0.77267956 0.65996 0.7364 0.81224 0.60693  
1.35210292 0.50314236 1.01246657 0.56017954 0.79302683 0.64099 0.68552 0.37247 1.24174  
2.61822539 0.181272461 1.90984491 0.519180386 1.85793641 0.01118 2.36293 0.68152 0.67525  
1.24514022 0.15191638 0.15793641 0.15191638 0.15793641 0.49057 0.75329 0.41561 0.98485  
1.25712077 0.613492961 0.98465466 0.613492961 0.98465466 0.54263 0.75329 0.41561 0.98485  
1.04027275 0.984937964 0.58989043 0.984937964 0.58989043 0.984937964 0.58989043 0.984937964  
0.97197432 0.789836029 0.75768355 0.789836029 0.75768355 0.54069 0.91741 0.77837 0.72886  
1.08108505 0.423867141 1.05506917 0.70788309 0.74272794 0.67779 0.78089 0.22042 1.21069  
1.15403451 0.41182134 1.02002841 0.30021747 1.05805795 0.94203 0.56017 0.36845 1.03001  
0.68243429 0.77759231 0.50040401 0.497428386 1.0309853 0.50823 0.78859 0.7304 0.49835  
0.7468307 0.99626727 0.48821828 0.32969975 1.35213764 0.393 1.03465 0.5843 0.79609  
1.19888637 0.375214676 1.11590424 0.5640064 0.70927624 0.49051 0.73855 0.3336 1.12442  
0.222522753 1.16292003 0.31006837 1.1299065 0.34569 1.0949 0.09089 2.49219  
1.138119278 3.12029298 0.66554027 0.46744676 0.66554027 0.46744676 0.66554027 0.46744676  
0.734446419 0.40316233 0.76264054 0.34322668 0.734446419 0.40316233 0.76264054 0.34322668  
0.86435718 0.84469319 0.75091299 0.43405742 0.946591 0.49488 0.95123 0.92548 0.57669  
0.42852497 0.088273685 1.9652136 0.07742878 1.90307871 0.4341 0.9783 0.21479 2.37037  
0.452688118 1.016761 0.32006497 1.06896748 0.4341 0.9783 0.4048 0.74549  
0.107152335 2.97203737 0.06836849 2.97203737 0.06836849 2.97203737 0.06836849 2.97203737  
0.338800363 1.13879353 0.0771958 1.66656788 0.43882 0.93758 0.83121 0.54878  
0.89541544 0.988943199 0.49112311 0.898943199 0.49112311 0.54231 0.91366 0.98608 0.4339  
1.53325674 0.486138328 1.09263532 0.486138328 1.09263532 0.35309 1.11067 0.62105 0.59115  
0.89301631 0.178440496 1.34476822 0.58086444 0.78655498 0.83378 0.58459 0.02757 1.82718  
0.72739893 0.601376873 0.94070951 0.80197044 0.50994254 0.90581 0.60058 0.16133 1.34685  
0.73704975 0.781481256 0.66494441 0.78539853 0.50994254 0.81806 0.53493 0.34221 1.60197  
0.840484175 0.74519386 0.70859909 0.77449718 0.81136 0.75225 0.71573 0.49432  
1.1261688 0.362786944 1.04728084 0.34178609 1.04342382 0.48747 0.7642 0.29459 2.22485  
1.88918711 0.27799662 1.46662548 0.23491087 1.46052548 0.27799662 1.46662548 0.23491087 1.46052548  
0.69727342 0.17602073 1.18484201 0.00393754 1.9813755 0.96614 0.51116 0.1536 1.27212  
1.12762488 0.632686161 0.93738479 0.632686161 0.93738479 0.53297 0.78279 0.78413 0.40558  
1.3718851 0.46872288 1.0567371 0.867528209 0.62570601 0.19075 1.28179 0.62078 0.41472  
1.08463376 0.491252376 1.04481366 0.5133362 0.68534438 0.44047 0.8074 0.8329 0.60487  
1.8964864 0.8964864 0.8964864 0.8964864 0.8964864 0.8964864 0.8964864 0.8964864  
0.79319606 0.603402305 0.96965978 0.72523905 0.75116631 0.34902 1.04828 0.94765 0.54869  
1.99024831 0.388725017 1.20587431 0.64354991 0.61472601 0.59469 0.65041 0.25541 1.4715  
1.06329071 0.086378078 2.95429454 0.14751387 0.17346294 0.74873 0.79954 0.01148 0.88769  
0.83136892 0.523368199 0.92966847 0.40446381 0.9485493 0.34183 1.19794 0.49348 0.28233  
1.12056912 0.436676813 1.00421888 0.41296613 0.95513515 0.41194 1.00431 0.39173 1.08077  
1.14618565 0.008022152 1.60513955 0.00871252 1.77714931 0.61005 0.88601 0.01577 1.77798  
2.29029864 0.63033801 0.78019264 0.63033801 0.78019264 0.58619 0.77185 0.59647 0.78622  
1.73363174 0.483248467 1.00839626 0.483248467 1.00839626 0.39444 1.02276 0.40867 0.96723  
0.96248933 0.999359234 0.29963252 0.999359234 0.29963252 0.62248 0.78618 0.99964 0.21423  
1.92017677 0.397784681 1.24090317 0.397784681 1.24090317 0.26989 1.37878 0.46586 0.96452  
1.26872323 1.26872323 1.26872323 1.26872323 1.26872323 1.26872323 1.26872323 1.26872323  
1.34283999 0.30557406 1.19417243 0.30557406 1.19417243 0.64291 0.73631 0.2355 1.33348  
0.98791633 0.418276751 1.12740068 0.57697021 0.60162002 0.418276751 1.12740068 0.57697021 0.60162002  
0.44975939 1.13164576 0.44471148 0.87156603 0.44975939 1.13164576 0.44471148 0.87156603  
0.25736639 1.31604164 0.20849139 1.32666235 0.25736639 1.31604164 0.20849139 1.32666235  
0.231311377 1.43251863 0.4429827 1.54913651 0.65192 0.29211 0.47794 0.87103  
0.000300315 1.78125835 0.00040801 2.44907513 0.13728 1.24159 0.00044 2.88629  
0.524893967 0.81543248 0.524893967 0.81543248 0.524893967 0.81543248 0.524893967 0.81543248  
1.14618565 0.589782585 0.76813236 0.395499355 1.02107179 0.35871519 1.02237852 0.45582 0.94327 0.40777 0.76813  
0.42525143 0.395499355 1.02107179 0.35871519 1.02237852 0.45582 0.94327 0.40777 0.76813

0.86203811 0.54758642 0.61260329 0.62163309 0.67489734 0.53575 0.84116 0.45724 0.6126  
0.88318568 0.62789489 0.7163278 0.59673868 0.78242215 0.61558 0.82679 0.45624 0.71004  
0.93383293 0.859524136 0.66958732 0.6078417 0.73904064 0.86789 0.65671 0.4755 0.6946  
0.86560014 0.414150291 1.09688984 0.28759852 1.21769744 0.59544 0.67638 0.69439 0.62697  
0.54629575 0.735887329 0.50794535 0.66933611 0.57125171 0.71726 0.39729 0.57652 0.61912  
0.7064574 0.88039496 0.70540758 0.99006182 0.39673612 0.34923 1.15076 0.66026 0.65198  
0.85645399 0.56632811 0.56266181 0.81913675 0.89931 0.53403 0.65031 0.51129  
0.8563025 0.612748289 0.62058027 0.58524657 0.65334886 0.71885 0.59989 0.42108 0.62451  
0.71584224 0.643511099 0.72243801 0.58524657 0.65334886 0.61314 0.75301 0.42547 0.66875  
1.8904525 0.279536722 1.02356775 0.00880919 1.85472747 0.4052 1.00793 0.04871 1.65019  
1.0355498 0.93699841 0.46523386 0.47895051 0.78988607 0.96761 0.6199 0.46665 0.90186  
0.55605843 0.159113691 1.66525228 0.07277386 2.68863198 0.28445 1.38414 0.70421 0.38901  
0.62896922 0.41465467 0.40427563 0.94815162 0.69243 0.73021 0.9312 0.46796  
0.73064011 0.792877606 0.83732584 0.40427563 0.94815162 0.69243 0.73021 0.9312 0.46796  
0.84029166 0.78086505 0.63529944 0.51772478 0.75541098 0.79927 0.62521 0.60083 0.69706  
1.0502066 0.709093114 0.62069418 0.51772478 0.75541098 0.82506 0.59688 0.62087 0.7126  
1.21656076 0.594035387 0.9211348 0.448498 0.90536 0.43615 0.92694  
0.64671684 0.30219973 0.75151952 0.60393651 0.41701998 0.70652 0.72424 0.57085 0.85522  
0.77031968 0.613098672 0.83685216 0.51302287 0.73149855 0.66504 0.39104 0.42223 0.88741  
0.630574331 0.83793311 0.71321431 0.43333971 0.6245925 0.42812 0.90948  
0.62245925 0.95193032 0.33300369 1.06893957 0.61593 0.58126 0.95952 0.24566  
0.86519785 0.543802666 0.7241857 0.56317931 0.69599189 0.72065 0.53117 0.43821 0.72419  
0.608191869 0.35509344 0.97693995 0.07392645 0.5342 0.75756 0.61374 0.35509  
0.997995349 0.2215445 0.97693995 0.07392645 0.5342 0.75756 0.99777 0.25089  
0.84716487 0.249812646 1.14965955 0.14157254 1.33973749 0.16896 1.26884 0.89977 0.57139  
1.75592933 0.612241454 0.97259037 0.39306076 0.84333539 0.63558 0.62242 0.40461 0.9777  
0.000173059 3.26185124 0.00018851 18.1636122 0.00078 3.489 0.10777 1.75396  
0.71565588 0.44583755 1.02501769 0.4715274 0.85976837 0.40231 1.03249 0.70132 0.82233  
1.59477563 0.796513536 0.61856501 0.82284701 0.57248508 0.49609 0.9292 0.61397 0.75337  
0.98112642 0.738826155 0.65301459 0.738826155 0.65301459 0.81898 0.6019 0.61261 0.78623  
0.65980048 0.573500791 0.69753354 0.50931486 0.8298761 0.54223 0.88219 0.57311 0.68987  
0.83521297 0.62903422 0.73949485 0.47161622 0.8848174 0.61362 0.88219 0.67395 0.53368  
0.66228017 0.865790886 0.70088617 0.63402428 0.82320816 0.58593 0.89699 0.92879 0.53699  
1.57977769 9.02745E-05 2.29322951 2.3918E-05 5.13189069 0.00498 1.99988 0.00904 1.5862  
0.90036257 0.769440789 0.72974922 0.54298929 0.85314103 0.7932 0.71013 0.57391 0.81085  
0.85923296 0.29994071 0.8697293 0.23202474 1.10824732 0.2463 1.2558 0.88141 0.63347  
0.91045807 0.78330883 0.77703296 0.72719585 0.67658888 0.85614 0.53163 0.44275 0.94737  
0.748860712 0.75275771 0.63200027 0.67119535 0.96878 0.34628 0.19313 1.61851  
1.46920907 0.419610437 1.14622993 0.62129699 0.43958466 0.36154 1.20164 0.5647 0.64869  
0.80499593 0.182508217 1.49075644 0.18339984 1.5053935 0.28742 1.57106 0.45961 0.80683  
1.46862139 0.00373694 1.8384321 0.08676674 3.0644094 0.017 1.87828 0.11713 1.42952  
0.80499593 0.668212589 0.89172939 0.42656117 0.95211119 0.50397 0.93649 0.76836 0.65813  
2.23220503 0.91232322 0.7207084 0.91705526 0.45780714 0.9873 0.45437 0.33877 1.13117  
1.14838425 0.187630013 0.3971317 0.03899375 1.5473436 0.72968 0.81023 0.4872 0.93326  
0.96742684 0.262763925 1.34560982 0.47385448 0.64811137 0.30132 1.25985 0.25528 1.64567  
0.620853906 0.81441737 0.6351497 0.68101387 0.45451 0.91201 0.43724 0.70438  
0.65337476 0.602322719 0.92217201 0.4142098 0.93597011 0.59962 0.65547 0.44597 0.67696  
0.9210688 0.503497457 1.00503516 0.43370741 0.8972558 0.77129 0.66421 0.29421 1.18899  
1.08520205 0.51245195 0.97812448 0.49913887 0.72481956 0.92436 0.54089 0.33282 1.06205  
1.25237978 0.555140006 0.62560415 0.45078354 0.62626394 0.51566 0.61638 0.50045 0.59339  
0.101563155 0.68757301 0.92182757 0.7737478 0.65394125 0.9384 0.58933 0.34732 1.07136  
0.89901645 0.729547921 0.6290174 0.59227248 0.63657452 0.63885 0.60647 0.70416 0.63589  
0.97809739 0.572033672 0.90266971 0.46839421 0.99533026 0.44971 0.76699 0.44925 0.90267  
0.949882738 0.786170098 0.49179456 0.5220499 0.64233418 0.41812 0.99936 0.92105 0.44181  
0.92843934 0.641360555 0.6070081 0.6448248 0.48486271 0.55357 0.68031 0.44231 0.73887  
0.80012481 0.816443407 0.60064825 0.84533596 0.59643167 0.51103 0.91417 0.57301 0.50441  
1.02408885 0.794118344 0.62742874 0.74845325 0.59683873 0.71887 0.65292 0.44746 0.71208  
0.46702174 0.32922967 1.15708303 0.46682052 0.90784194 0.27706 1.17484 0.54951 0.48166  
1.71077637 0.046930021 1.32814318 0.03438192 1.54881412 0.16885 1.22548 0.26816 1.21688  
0.620962451 0.88971751 0.74603081 0.43970226 0.44282 0.94979 0.49732 0.78658  
0.16121793 0.17663984 0.38936 1.0764  
0.89216197 0.755821101 0.79559845 0.75069557 0.7159788 0.58901 0.88948 0.66874 0.79995  
0.79774311 0.146576878 1.27496281 0.47397785 0.92736853 0.01575 1.64236 0.83528 0.70146  
1.00325795 0.328485667 1.11403345 0.328485667 1.11403345 0.5206 0.82895 0.34556 1.11594  
0.52621716 0.837845808 0.58705892 0.63632627 0.65619971 0.95571 0.47542 0.41653 0.93236  
0.61418298 0.63804756 0.76403884 0.43422962 0.87210258 0.63994 0.49586 0.61623 0.57313  
0.9190602 0.422554307 0.03884151 0.31274042 1.07868443 0.72731 0.74612 0.42808 0.7789  
0.71167805 0.838453303 0.60712223 0.80980995 0.37301565 0.77879 0.65973 0.6407 0.68148  
0.85045834 0.35093942 1.0411316 0.47440257 0.87444033 0.329 1.09291 0.37087 1.03086  
0.65279005 0.541285714 0.65667475 0.79578641 0.45687686 0.59646 0.64532 0.48945 0.83763  
0.565160441 0.84475174 0.47107 0.87642 0.44851 0.82295  
0.83346173 0.255842181 1.15308516 0.16890482 1.39979817 0.83446 0.71133 0.08555 1.44172  
1.01771053 0.326828051 1.1713744 0.09715929 4.7157333 0.37849 1.09575 0.61266 0.60117  
0.697782447 0.54763049 0.70424684 0.51718205 0.56645 0.59172 0.43397 0.65867  
0.374101242 1.2925919 0.374101242 1.2925919 0.374101242 1.2925919 0.374101242 1.2925919  
0.96218847 0.863542268 0.54439419 0.62735865 0.65632666 0.53371 0.85838 0.89406 0.50495  
0.54829811 0.51488146 0.59621 0.5337 0.59621 0.5337 0.54923 0.3462  
0.520442446 0.5814207 0.520442446 0.5814207 0.520442446 0.5814207 0.520442446 0.5814207  
1.57075889 0.484597919 1.02290801 0.54710648 0.77858039 0.73064 0.71289 0.3088 1.18881  
1.16597923 0.77824833 0.62091488 0.77824833 0.62091488 0.77824833 0.62091488 0.77824833  
1.37056077 0.634076649 0.91469861 0.39862673 0.9379029 0.68547 0.62478 0.49557 0.7090  
0.69530256 0.664732697 0.90399882 0.75781937 0.73586632 0.52102 0.93485 0.44802 0.96735  
0.65971312 0.66321935 0.48964357 0.57237993 0.66110754 0.68125 0.33607 0.47145 0.68427  
2.07879504 0.56000159 0.63777212 0.18118124 1.24463598 0.63329 0.6362 0.66184 0.65534  
1.0517764 0.24605764 1.0839664 0.594693006 0.9864591 0.74018967 0.5515439 0.41357 1.0629 0.25011 1.20299  
2.08658802 0.810360159 0.5688688 0.82109217 0.48747257 0.6755 0.67632 0.56121 0.64879  
0.65482407 0.6772237 0.71529408 0.3545015 0.6755 0.67632 0.431 0.83505  
0.612871522 0.83001519 0.612871522 0.83001519 0.612871522 0.83001519 0.612871522 0.83001519  
1.58420073 0.60049637 0.8199924 0.77085685 0.44425822 0.37085 1.40081  
0.754235805 0.54055498 0.59523869 0.65097702 0.73523 0.4392 0.66507 0.59024

1.85705522 0.357809878 1.07081093 0.49157742 0.82771454 0.36778 1.05445 0.33342 1.2161  
0.81732575 0.693206872 0.71386691 0.42044797 0.65996025 0.56809 0.84471 0.70483 0.64286  
0.95771093 0.86657482 0.66603152 0.79138095 0.63364055 0.84217 0.65726 0.55046 0.87247

1.13956384 0.000794002 1.79749639 0.00186435 2.39728045 0.01026 1.79414 0.08967 1.43386  
1.46271538 0.172755149 1.14532163 0.06675764 1.55334182 0.34729 1.05390 0.18835 1.68246  
0.9494902 0.614526 0.96976613 0.39087413 0.96826267 0.44565 0.97411 0.51862 0.74774  
1.09910634 0.70337039 0.58296402 0.73794638 0.5284981 0.55009 0.75779 0.54517 0.73411  
1.06793458 0.714114935 0.46363901 0.303763846 1.88779454 0.53482 0.59781 0.67709 0.45245  
1.19218247 0.02009361 1.74684188 0.03763846 0.000387 2.71075 0.76123 0.70484

0.80705098 0.914897081 0.65938883 0.72220988 0.7561608 0.84382 0.55342 0.87157 0.65008  
0.8260325 0.90752702 0.6209284 0.74396479 0.79594838 0.53043 0.92485 0.9491 0.64432  
0.97204203 0.91069114 0.60043021 0.87722607 0.52802194 0.85527 0.64349 0.51979 0.83506  
0.87873999 0.420555972 1.0267474 0.48630383 0.9129215 0.3765 1.03173 0.65796 0.68824

0.54555007 0.64482848 0.45963 0.64483  
0.556237525 0.80410956 0.44709 0.80411  
0.567569723 0.46334392 0.5662 0.46334

0.54548966 0.71618792 0.4597 0.71619

1.11837922 0.934675844 0.56472852 0.91451441 0.40692338 0.88888 0.61117 0.58005 0.79728  
0.44224467 0.768470102 0.8709865 0.94733432 0.5834387 0.12273 1.30094 0.9705 0.50163  
0.70663198 0.805808034 0.54476433 0.792375 0.48342 0.79375 0.48342 0.71167 0.61246  
0.70220968 0.88308131 0.23156517 1.29907663 0.98344 0.50176 0.22044 4.40991  
0.62256407 0.71899498 0.62762 0.56484 0.43757 0.81769  
4.78603667 0.018374834 1.86445154 0.0020496 5.8498298 0.09796 1.47985 0.28406 1.46728  
2.85712806 0.793814096 0.33107394 0.81760723 0.30312659 0.60013 0.49231

1.02203949 0.629981532 0.72598716 0.54901072 0.68854352 0.4785 0.81395 0.6299 0.72456

0.86332507 0.574890156 0.94388744 0.98765664 0.44634693 0.0929 1.38225 0.47048 0.86965  
1.01120027 0.36771001 1.07808121 0.74704111 0.74293787 0.19083 1.19133 0.60816 0.84174  
1.31687938 0.78613559 0.84067493 0.8114286 0.64512493 0.99146 0.43165 0.15262 1.30763  
0.51382777 0.406450296 1.01830205 0.9614441 0.55381779 0.12994 0.32992 0.29994 0.10393  
1.25089485 0.633851057 0.8881851 0.71884384 0.59902123 0.51558 0.91756 0.43464 0.94398

0.577882743 0.97773812 0.55747174 0.72040788 0.42717 0.97925 0.5707 0.59876  
1.23677971 0.7064824 0.9264999 0.86142411 0.64645354 0.94192 0.61862 0.16017 1.26761  
0.516708654 0.49626672 0.50653 0.49627

1.079344 0.66419552 0.89265059 0.54914188 0.76897064 0.93386 0.5417 0.28286 1.19442  
1.06551582 0.755338651 0.81026351 0.77476065 0.61156163 0.75306 0.70493 0.48558 0.95108  
1.41437799 0.369670389 1.13784804 0.42230634 0.88411844 0.26363 1.82625 0.37109 1.14024  
0.208642909 1.10589164 0.62206325 0.64292139 0.36762 1.03803 0.02977 1.69043

0.403704342 1.25822479 0.56867444 0.67223878 0.47109 0.88079 0.31886 1.48769  
0.68001477 0.82629931 0.66210581 0.66038112 0.73955066 0.84435 0.61652 0.54864 0.8341  
1.74047819 0.64027293 0.95216868 0.62269918 0.70027521 0.76268 0.69973 0.42427 0.97545

1.49001519 0.21471123 1.16107847 0.52447338 0.85383448 0.37607 1.05903 0.08769 1.5125  
0.2112005 0.567599554 0.71413527 0.4936 0.84274 0.54857 0.70569  
0.62874209 0.938488125 0.59734656 0.46042132 0.93555319 0.55501 0.91453 0.98369 0.45198

0.592309507 0.87847146 0.40482 0.87847  
1.68036345 0.441021737 1.00390515 0.62403952 0.62568164 0.41529 1.00405 0.41646 0.68635  
1.30592429 0.944172445 0.1638327 0.53104967 0.70648568 0.96859 0.15194 0.96859 0.15194  
0.5868222 0.550792992 0.55958622 0.789302 0.55831 0.4786 0.68887  
0.77479426 0.496868215 1.00163846 0.85642463 0.61999517 0.90848 0.60708 0.39279 1.01057  
0.48324 0.62744

0.64270192 0.957300075 0.43755211 0.9870088 0.33350731 0.54694 0.86026 0.44069 0.86338

0.853857949 0.31405597 0.58061385 0.62802071 0.89072 0.27035

0.81603325 0.617328624 0.98221949 0.3862126 0.98276527 0.27035 1.1189 0.95474 0.49917  
0.9433774 0.195020679 1.3991747 0.09799029 2.4735717 0.17666 1.61817 0.41585 0.8971  
1.19547991 0.465954719 1.0661118 0.55234068 0.84218381 0.41426 0.86572 0.3069 1.12288  
0.82280319 0.627351869 0.91375195 0.66847423 0.76826095 0.7386 0.80102 0.26751 1.37149

0.96288804 0.445786754 1.02533067 0.64027614 0.69858843 0.7378 0.51593 0.37292 1.04276  
0.60383503 0.99129559 0.37065795 0.4985071 0.25539 1.35451 0.37566 1.40172  
1.03204542 0.710547605 0.88218236 0.58571706 0.6526497 0.88978 0.48073 0.42394 0.95922  
1.43404016 0.41989253 1.04785072 0.3243825 1.08994234 0.41953 0.93758  
1.29711743 0.02600131 2.2564636 0.02911747 2.882864 0.64373 0.65216 0.14466 1.94766  
0.65329029 0.429807942 1.03799432 0.17637138 1.18322268 0.81614 0.72961 0.72963 0.69152  
0.80325313 0.004832068 1.88230214 0.0020819 4.00643886 0.15179 1.322 0.09641 1.95184  
0.85531898 0.569264063 0.97431945 0.54185758 0.82682158 0.92584 0.53522 0.35645 1.06156

1.15404975 0.590733298 0.98204132 0.56121404 0.62792471 0.40666 0.98204 0.52482 0.49795  
1.72253431 0.620704892 0.63890754 0.49237119 0.83384707 0.53711 0.74951 0.42721 0.6106

0.79711031 0.02784739 0.61728355 0.7406613 0.67787303 0.82239 0.66905 0.90523 0.52231  
0.72924975 0.624267123 0.7722234 0.45872087 0.86309734 0.59782 0.7970 0.58872 0.76051  
0.57891538 0.61419008 0.737675 0.44860576 0.84442506 0.56128 0.62771 0.61066 0.61205  
0.91697173 0.871034594 0.86113083 0.6651294 0.68703045 0.87988 0.52448 0.47917 0.6469  
1.0528057 0.017862181 1.41733275 0.101043796 1.73109048 0.19097 1.18822 0.09281 1.61116  
0.9013746 0.612999229 0.97010863 0.64409588 0.75294449 0.65857 0.71958 0.41742 0.97905

0.70057195 0.399097004 1.41267205 0.464014887 1.04258465 0.6912938 0.58914616 0.38454 1.09645 0.51611 0.83281  
0.96405103 0.63198448 0.95295348 0.86270168 0.31527313 0.61795 0.51501 0.4173 0.97234  
1.46303913 0.541994442 0.72274249 0.541994442 0.72274249 0.541994442 0.72274249 0.46386 0.77722  
1.8923993 0.585970186 0.96066177 0.5707483 0.67579802 0.50694 0.67042 0.41773 0.96299  
1.0928874 0.047858118 1.57258328 0.03614034 1.68539819 0.54014 0.88418 0.15773 1.47366  
1.9036001 0.499074739 1.01647661 0.56285211 0.65882353 0.71485 0.52738 0.37085 1.18487  
0.9395487 0.82944707 0.6636707 0.7121289 0.68692045 0.84231 0.56109 0.42423 0.86457  
0.76441378 0.56267459 0.73131725 0.45763848 0.79391 0.43968 0.39722 1.53129  
0.428939779 1.041051 0.62861771 0.75399025 0.37554 1.05512 0.53388 0.556

0.76234993 0.43779506 0.96097667 0.5037142 0.90701058 0.44195 0.98461 0.91344 0.44011  
0.44070202 0.44270043 0.07146804 0.64193637 0.48009644 0.64193637 0.48009644 0.64193637 0.48009644  
0.6504995 0.49498273 1.00205803 0.3424431 1.01705375 0.88838 0.68213 0.95985 0.52837  
1.0923953 0.39125944 1.1015547 0.59972902 0.82892601 0.35651 1.10515 0.57295 0.38786  
1.63526285 0.631825916 0.54200547 0.64648 0.49075 0.56788 0.66411  
0.5928125 0.41938379 1.00274566 0.1777146 1.2377271 0.80662 0.62964 0.40232 1.00251  
1.53124194 0.593133083 0.9998919 0.381813 0.97486014 0.90996 0.25463 0.02099 2.5972



|            |             |             |            |            |          |         |
|------------|-------------|-------------|------------|------------|----------|---------|
|            | 0.533904342 | 0.97004019  | 0.78334328 | 0.41658477 | 0.39161  | 1.14653 |
|            | 0.57171761  | 0.62289771  |            |            | 0.5774   | 0.62129 |
| 0.8548506  | 0.803306878 | 0.74705055  | 0.72782242 | 0.72061655 | 0.771119 | 0.76258 |
|            | 0.75270741  | 0.6824996   | 0.49995614 | 0.60879431 | 0.6416   | 0.7775  |
|            | 0.46663158  | 1.0052469   | 0.01547587 | 2.81248251 | 0.42466  | 0.93278 |
| 1.29365871 | 0.812221943 | 0.57459675  | 0.64968491 | 0.61887921 | 0.82627  | 0.54962 |
| 0.5381565  | 0.84643205  | 0.59048414  | 0.85308294 | 0.54180106 | 0.67569  | 0.68547 |
| 0.97509209 | 0.674957944 | 0.77332369  | 0.49098472 | 0.8176262  | 0.70175  | 0.72788 |
|            | 0.118431599 | 2.15231232  | 0.08879568 | 2.11184768 | 0.46643  | 0.91823 |
|            |             |             |            |            | 0.31996  | 3.06795 |
| 1.02790364 | 0.809222124 | 0.67002437  | 0.70966334 | 0.56611667 | 0.77687  | 0.6974  |
| 0.82304527 | 0.640769681 | 0.69473297  | 0.59570356 | 0.65970237 | 0.62017  | 0.71069 |
|            |             |             |            |            | 0.5132   | 0.57773 |
| 0.46082191 | 0.752508143 | 0.61857025  | 0.72490438 | 0.4482561  | 0.47352  | 0.77242 |
| 0.95356821 | 0.743730903 | 0.74672902  | 0.62064925 | 0.59874664 | 0.44499  | 0.93278 |
| 0.98346687 | 0.390190506 | 1.03927211  | 0.47566084 | 0.90780282 | 0.51588  | 0.90394 |
|            | 0.99141185  | 0.17272338  | 0.97193133 | 0.16958979 | 0.51588  | 0.90394 |
|            | 0.505128441 | 1.00319612  | 0.55671709 | 0.87025156 | 0.19088  | 1.19937 |
| 0.74585165 | 0.593168153 | 0.98527799  | 0.64221207 | 0.74027215 | 0.48773  | 0.94222 |
| 2.33056157 | 0.751334676 | 0.5368939   | 0.80254183 | 0.42977057 | 0.58921  | 0.79614 |
| 0.73789152 | 0.669013716 | 0.6519779   |            |            | 0.68425  | 0.65198 |
|            |             |             |            |            |          |         |
| 0.88169776 | 0.7478903   | 0.75880916  | 0.54680592 | 0.79429379 | 0.77208  | 0.70918 |
| 0.85425295 | 0.761766127 | 0.72787042  | 0.66849149 | 0.67246301 | 0.76875  | 0.69335 |
| 0.90914013 | 0.288078079 | 1.16868248  | 0.46815343 | 0.93882951 | 0.23899  | 1.15477 |
| 1.13887483 | 0.462820341 | 0.101846376 | 0.43852386 | 0.94074894 | 0.74195  | 0.75304 |
| 0.77777884 | 0.589218569 | 0.95879449  | 0.90638156 | 0.5202104  | 0.34002  | 1.08994 |
| 0.65499698 | 0.640670427 | 0.96024238  | 0.71321837 | 0.77816634 | 0.35707  | 1.0418  |
| 0.55564192 | 0.732975438 | 0.79493148  | 0.40679033 | 0.91929809 | 0.55922  | 0.72439 |
| 0.9724358  | 0.634282916 | 0.97863888  | 0.41201783 | 0.92129648 | 0.86373  | 0.57735 |
| 0.69947835 | 0.036934786 | 1.79406271  | 0.10015849 | 1.59847283 | 0.03781  | 2.09756 |
|            | 0.271871244 | 1.828361    |            |            | 0.41645  | 0.98792 |
| 0.69746346 | 0.54643115  | 0.25080616  | 0.51337776 | 0.75118918 | 0.48931  | 0.81779 |
|            | 0.663274035 | 0.55642069  |            |            | 0.67851  | 0.54614 |
| 0.93765826 | 0.716719149 | 0.70026151  | 0.61918602 | 0.69955533 | 0.69972  | 0.6808  |
| 1.38618088 | 0.836613096 | 0.45915198  | 0.8802477  | 0.40199487 | 0.545    | 0.79626 |
| 0.82734988 | 0.906866757 | 0.66007212  | 0.82641234 | 0.59585522 | 0.46131  | 0.94048 |
|            | 0.793005382 | 0.88188768  | 0.80677318 | 0.58714572 | 0.43369  | 0.97612 |
| 0.82883842 | 0.37157814  | 1.29917008  | 0.51021808 | 0.7248946  | 0.25196  | 1.62361 |
| 0.65624189 | 0.661973108 | 0.87490109  | 0.42148933 | 0.93423089 | 0.69532  | 0.69739 |
|            |             |             |            |            | 0.59411  | 0.80485 |
| 0.86582853 | 0.442506375 | 1.00444989  | 0.66435861 | 0.74533323 | 0.41299  | 1.00484 |
| 1.00303601 | 0.667919505 | 0.95661223  | 0.53123047 | 0.74857091 | 0.42978  | 0.98334 |
|            | 0.52708829  | 0.80249062  | 0.51968094 | 0.700306   | 0.94234  | 0.46349 |
| 0.45025022 | 0.45252824  | 1.00876065  | 0.6057311  | 1.20048294 | 0.42115  | 0.9892  |
| 0.71895188 | 0.77305286  | 0.79168468  | 0.74683802 | 0.6685261  | 0.46005  | 0.96265 |
| 1.12222966 | 0.451881179 | 1.03568404  | 0.55268406 | 0.80682655 | 0.78204  | 0.64318 |
|            |             |             |            |            | 0.30702  | 1.1156  |
| 0.7106831  | 0.606843864 | 0.97134268  | 0.28004466 | 1.06740866 | 0.70093  | 0.83425 |
| 0.71902184 | 0.708757309 | 0.42427183  | 0.71949087 | 0.36862665 | 0.50405  | 0.87213 |
| 1.4978897  | 0.399583078 | 1.63388839  |            |            | 0.37036  | 1.63386 |
| 0.84883732 | 0.657480729 | 0.72451178  | 0.60192539 | 0.80811575 | 0.56783  | 0.82379 |
| 1.43726422 | 0.483774195 | 1.43772408  |            |            | 0.30838  | 1.44791 |
|            |             |             |            |            | 0.48981  | 0.84955 |
| 1.22076898 | 0.008128426 | 2.36554929  | 0.00264226 | 4.17610096 | 0.24647  | 1.40834 |
|            | 0.428816243 | 1.0452191   | 0.49579602 | 0.79492813 | 0.75793  | 0.59829 |
|            | 0.52769528  | 0.89538241  | 0.48530277 | 0.87153464 | 0.49441  | 0.83132 |
| 0.57062047 | 0.102526197 | 1.29334342  | 0.076619   | 1.87801837 | 0.55089  | 0.86867 |
|            |             |             |            |            | 0.19817  | 1.20529 |
|            |             |             |            |            |          |         |
| 1.23461255 | 0.272484701 | 1.43280354  |            |            | 0.49467  | 0.54567 |
| 0.53366766 | 0.61835176  | 0.88981978  |            |            | 0.43825  | 0.82851 |
| 0.88341046 | 0.537749918 | 0.95875617  | 0.72489346 | 0.43820068 | 0.62651  | 0.70821 |
| 0.99974883 | 0.480471354 | 1.01052777  | 0.57224661 | 0.79945969 | 0.84533  | 0.58188 |
|            | 0.554887533 | 0.75238838  |            |            | 0.44667  | 0.79239 |
| 1.0402832  | 0.415080688 | 1.12466436  | 0.64828787 | 0.87174236 | 0.56064  | 0.66086 |
|            | 0.568817385 | 0.80148732  | 0.84919699 | 0.31078131 | 0.53221  | 0.78491 |
|            | 0.821164992 | 0.30879692  |            |            | 0.56641  | 0.18633 |
| 0.80027764 | 0.826829014 | 0.86810825  | 2.2437142  | 1.1240586  | 0.98481  | 0.48637 |
| 1.39648915 | 0.819460109 | 0.707381    | 0.96351386 | 0.45487617 | 0.92474  | 0.44236 |
| 0.97200917 | 0.642300639 | 0.90142906  | 0.61744327 | 0.74252571 | 0.36475  | 1.11636 |
|            |             |             |            |            | 0.88656  | 0.52803 |
| 1.19212226 | 0.583997743 | 0.98131189  | 0.79187129 | 0.6861813  | 0.95463  | 0.50508 |
|            |             |             |            |            | 0.37567  | 1.02933 |
| 1.36556718 | 0.426013531 | 1.02443429  | 0.58777505 | 0.49907982 | 0.3981   | 1.02513 |
| 0.90995198 | 0.37055943  | 1.33015923  | 0.52957023 | 0.65763313 | 0.5134   | 0.6396  |
|            | 0.815178884 | 0.55178318  | 0.63703896 | 0.5239697  | 0.62081  | 0.66097 |
|            |             |             |            |            | 0.82341  | 0.53811 |
| 0.71265019 | 0.642412507 | 0.74856214  | 0.51212788 | 0.76026548 | 0.46574  | 0.89699 |
| 0.87182472 | 0.735827345 | 0.71430688  | 0.57564592 | 0.73584025 | 0.70656  | 0.66644 |
| 1.17357969 | 0.722318088 | 0.61532916  | 0.64820973 | 0.68325992 | 0.48907  | 0.76642 |
| 0.73384653 | 0.61409848  | 0.96384767  | 0.38191291 | 0.96847089 | 0.55717  | 0.76393 |
| 0.95607052 | 0.96619715  | 0.51722404  | 0.66599493 | 0.84025653 | 0.60353  | 0.79124 |
|            |             |             |            |            | 0.99054  | 0.40193 |
| 0.72876852 | 0.614467043 | 0.5495344   | 0.49975641 | 0.75291898 | 0.62106  | 0.54935 |
| 1.12489568 | 0.834543858 | 0.60979086  | 0.4431384  | 0.89388322 | 0.56119  | 0.64218 |
| 1.00965658 | 0.186541676 | 1.21522484  | 0.22375451 | 1.1586386  | 0.76426  | 0.70469 |
|            | 0.424473867 | 1.08862435  | 0.51737098 | 0.77395049 | 0.8013   | 0.45328 |
|            |             |             |            |            | 0.27516  | 1.23639 |
| 1.00771252 | 0.58748126  | 0.99360104  | 0.75261823 | 0.64139415 | 0.42244  | 0.99446 |
|            |             |             |            |            | 0.45125  | 0.68331 |
| 1.38121653 | 0.78507635  | 0.40128922  | 0.84729912 | 0.27539512 | 0.45961  | 0.83672 |
| 0.84072573 | 0.444181057 | 1.01963369  | 0.59333249 | 0.76168008 | 0.70122  | 0.70574 |
| 0.75393447 | 0.96227116  | 1.99010178  | 0.65179263 | 0.29313761 | 0.89225  | 0.68386 |
|            | 0.714877009 | 0.48612356  | 0.73648858 | 0.48612356 | 0.76447  | 0.71011 |
|            | 0.27594911  | 0.21500903  | 0.80128466 | 2.3548283  | 0.13508  | 1.37161 |
| 1.06171701 | 0.546561433 | 0.96711988  | 0.81170923 | 0.5090853  | 0.78398  | 0.51446 |
|            | 0.409996507 | 1.10903287  | 0.70974333 | 0.45871267 | 0.58531  | 0.7412  |
| 0.73646348 | 0.56690814  | 0.78878443  | 0.45796429 | 0.8163541  | 0.43348  | 0.79447 |
| 0.80227114 | 0.346598551 | 1.13278858  | 0.30767574 | 1.13538936 | 0.51317  | 0.78062 |
|            |             |             |            |            | 0.52375  | 0.82066 |
| 1.4839356  | 0.313992271 | 1.38596294  | 0.64392796 | 0.60125462 | 0.46832  | 0.90225 |
| 0.14848694 | 0.687602975 | 0.88266899  | 0.83593714 | 0.26510236 | 0.4033   | 1.42316 |
|            | 0.475168622 | 1.02274144  | 0.41875078 | 0.89329306 | 0.61991  | 0.599   |
|            |             |             |            |            | 0.40329  | 1.05866 |

2.05757868 0.164741591 1.16729698 0.31012761 1.07308020 0.51865 0.90724 0.02772 1.95453

0.84198098 0.561774822 0.7512918 0.55588057 0.64864397 0.48682 0.81999 0.47138 0.82506

0.94552443 0.609981996 0.66481891 0.59845383 0.54621076 0.53179 0.7452 0.43358 0.72729

1.77441025 0.36905264 1.2761488 0.5077787 0.7601643 0.56907 0.80738 0.28279 1.46629

2.03915894 0.005648568 1.89853812 0.00787666 2.29598174 0.61598 0.86383 0.00644 2.24809

1.44304175 0.689674113 0.94338567 0.92797675 0.45561132 0.70294 0.66709 0.42499 0.97945

1.1026688 0.160015114 1.16460312 0.08265687 1.79188605 0.37369 1.04928 0.12162 1.40655

0.8994932 0.880671302 0.64253522 0.99913502 0.25542199 0.24281 1.58068 0.06062 3.28118

1.45126164 0.54153904 0.9902577 0.39866409 0.9614704 0.78366 0.629 0.00000 1.06031

0.42932361 0.61777202 0.98480203 0.3808536 0.9852412 0.90957 0.62015 0.12916 1.47105

0.78034991 0.72515472 0.45437961 0.70670429 0.46830756 0.61537 0.24331 0.6413 0.47688

1.40493588 0.78077013 0.89288085 0.42742463 0.96040787 0.45165 0.97886 0.97511 0.50233

1.29059553 0.827660008 0.77826639 0.5105381 0.85602327 0.97179 0.53071 0.35383 1.13099

6.10210081 0.681861228 0.85888445 0.85792754 0.44134094 0.86591 0.50404 0.3032 1.20313

1.02152522 0.046621162 2.10222881 0.06739315 2.20084642 0.82183 0.7154 0.09061 2.00991

1.34950584 0.266206494 1.09605478 0.29140688 1.08495382 0.08573 1.44516 0.08573 1.44516

1.34950584 0.361284671 1.26431483 0.66972887 0.58295143 0.23959 1.50663 0.51578 0.75072

1.35052386 0.57164005 0.9840318 0.66708499 0.65818476 0.43286 0.98478 0.35855 1.50114

0.79992858 0.990813242 0.5297612 0.91766457 0.51994271 0.99884 0.41654 0.46299 0.9552

0.7761584 0.639333891 0.73641206 0.62474518 0.69955533 0.55133 0.76366 0.57417 0.78919

0.67099927 0.85949136 0.02982983 0.83892898 0.51546 0.93883 0.93035 0.59229

1.60959226 0.55925515 0.65877241 0.49291818 0.78892924 0.49106 0.80273 0.54338 0.63577

1.12793652 0.251128449 1.2211798 0.41826572 0.7996763 0.45216152 0.58863667 0.36166 1.12194 0.20004 1.36716

0.366517572 1.3350234 0.4994051 0.80089242 0.60727 0.62311 0.28033 1.52369

1.32054362 0.03928066 1.70481344 0.08845545 1.8057345 0.1266 1.74567 0.1268 1.59464

0.8916576 0.10198093 1.48197047 0.17602737 1.3153844 0.48586 0.86139 0.06846 2.24664

0.89320316 0.25408645 1.2089928 0.208371 1.4765059 0.39398 1.082 0.2851 1.47373

1.4407003 0.362983756 1.22126276 0.57743019 0.74818172 0.54442 0.79665 0.28456 3.17963

0.82514266 0.391721065 1.09585456 0.47900453 0.84604616 0.56004 0.7782 0.34879 1.0719

0.004294686 1.0630735 0.96102735 0.41255105 3.60156586 0.85458 0.69015 0.02158 4.02124

1.26137673 0.630485435 0.99530668 0.3675176 0.99555953 0.50912 0.66137 0.79446 0.63378

1.24526519 0.35978637 1.30676707 0.47327367 0.79182369 0.31814 1.32615 0.31814 1.32615

1.36143032 0.838278896 0.84682721 0.64869131 0.97903346 0.89281 0.54025 0.45216 0.93447

0.94681276 0.444363346 1.02839795 0.77292229 0.41784207 0.37669 1.04625 0.60928 0.61626

0.973184341 0.57609296 0.84168735 0.61379307 0.69715 0.82079 0.92528 0.34681

1.00351888 0.71861732 0.53279634 0.74255883 0.48769285 0.55075 0.75519 0.45458 0.92854

0.438295547 1.09834764 0.41652051 0.89329306 0.55969 0.76032 0.25165 1.65867

0.62474437 0.96884604 0.41652051 0.89329306 0.59864 0.66097 0.47215 0.97119

0.83469311 0.582833435 0.91136814 0.52948376 0.74801062 0.61148 0.66192 0.44994 0.94362

0.602807954 0.97626248 0.4859648 0.80340049 0.73712 0.49965 0.41167 0.98101

0.35989282 1.0267035 0.35327126 1.02724346 0.35327126 1.02724346 0.49957 0.57334

0.36629908 1.08307202 0.7524961 0.54664499 0.33638 1.15961 0.33399 1.10044

0.588169457 0.79094939 0.50651009 0.78754481 0.58187 0.78357 0.53862 0.81213

0.04861248 1.44770854 0.52296411 0.70721954 0.01784 5.64378 0.01784 5.64378

0.48977975 1.0337809 0.8583147 0.29927635 0.57681 0.81085 0.18364 1.91646

0.44078928 1.0476917 0.4412297 0.6978832 0.86638 0.68231 0.86638 1.54687

1.23623755 0.730201413 0.73451811 0.64400394 0.66253382 0.68179 0.75905 0.63699 0.72593

0.77596886 0.633907992 0.91093824 0.56642498 0.71755012 0.92501 0.45313 0.35947 1.10933

0.86673624 0.667334777 0.93183703 0.40957243 0.76096726 0.42815 0.97262 0.9082 0.37696

0.84617917 0.792712383 0.61049142 0.66359771 0.64457909 0.64039 0.68402 0.7195 0.55765

0.53265704 0.631698373 0.95460108 0.72290906 0.64085704 0.65432 0.80156 0.42974 0.97653

1.02630894 0.490981244 1.0077609 0.40288588 0.96136289 0.74782 0.71608 0.20129 1.23472

1.7810618 0.00026269 2.02036661 0.00012473 3.94568332 0.14542 1.27295 0.00031 3.43195

2.18991016 0.641061629 0.93326031 0.63033374 0.70185961 0.95246 0.9361 0.22739 1.17666

0.464827776 1.02910814 0.83188406 0.33252523 0.5634 0.75772 0.36661 1.0764

0.937294185 0.66103752 0.8464402 0.60481382 0.91814 0.63967 0.70122 0.77529

0.69705163 0.025766407 2.41476654 0.01097956 2.80504909 0.5221 0.82919 0.23154 1.70999

0.342209326 0.999798873 0.36684111 0.9994786 0.19166405 0.9622 0.51175 0.99031 0.38557

1.36656187 0.664526003 0.65720238 0.50016076 0.75702714 0.67326 0.65532 0.54864 0.67888

0.33897137 1.245129 0.79026146 0.35959734 0.2931 1.33859 0.24378 1.76092

1.02347039 0.081902104 1.29465525 0.12266491 1.27659911 0.57968 0.87578 0.08836 1.39297

0.762380228 0.38025114 0.78933184 0.38004238 0.49709 0.7282 0.33251 1.39349

1.28065014 0.621419582 0.98737441 0.37177856 0.98746707 0.53367 0.75951 0.53367 0.75951

1.0779075 0.07645072 1.70546208 0.14550499 1.50951629 0.21309 1.66843 0.07622 4.10134

1.52284944 0.641014948 0.95911734 0.38267026 0.96761736 0.69114 0.67882 0.43523 0.91522

2.67893619 0.348301465 1.1390303 0.4747982 0.88875 0.348301465 1.1390303 0.348301465 1.1390303

0.511220012 0.99995541 0.79062121 0.58826782 0.26227 1.14342 0.85066 0.52482

0.64420673 0.8224202 0.89181687 0.23202519 0.37829 1.19053 0.71677 0.36442

0.494280239 1.06091431 0.39356 1.06475 0.46897 0.87684

1.12474725 0.825375288 0.55988093 0.72563391 0.5836997 0.81146 0.54438 0.49464 0.89903

1.01331661 0.547282428 0.97880117 0.77289966 0.7122462 0.34966 1.09682 0.62568 0.81194

0.443880635 1.02594616 0.6735803 0.52343986 0.39754 1.03471 0.45358 0.90292

1.99798554 0.327038652 1.2797925 0.390284905 1.26340041 0.28846 1.27979 0.35972 1.2634

0.999742716 0.03425336 0.99997297 0.03425336 0.99997297 0.03425336 0.99997297 0.03425336

1.11475757 0.000187765 2.30495158 0.00196441 2.12432642 0.52478 0.93277 0.00061 2.79944

1.89717178 0.00073752 3.23457455 0.00577816 3.72253852 0.06739 2.62382 0.00845 3.2224

1.00930763 0.536381227 0.99497912 0.38371738 0.9681836 0.38847 0.93054 0.2845 0.47727

1.74814596 0.427455889 1.16112554 0.427455889 1.16112554 0.24152 1.22859 0.65027 0.7188

6.70446824 0.261175292 1.37736627 0.21581177 1.38061225 0.46153 0.40615 0.46153 0.40615

0.47226752 0.61901358 0.9757087 0.281518023 1.3386937 0.17363822 0.9757087 0.44599 0.91147 0.65424 0.40921

1.62811344 0.27895258 1.18782203 0.1319617 1.79785285 0.77782 0.74154 0.4821 0.92973

3.8485192 0.52807043 0.66200631 0.06232106 1.6026741 0.51986 0.66201 0.51986 0.66201

1.0683896 0.593247477 0.68710021 0.418282165 1.0639961 0.68262 0.68317 0.56078 0.71676

0.65942955 0.576091457 0.57866205 0.576091457 0.57866205 0.39179 1.06294 0.57619 0.57866

1.18093414 0.496126457 1.38609863 0.161603369 1.38175537 0.19417 1.38784 0.52665 0.52352

0.161603369 1.38175537 0.46955 0.92988 0.16269 1.47389







|            |             |            |             |            |         |         |         |         |
|------------|-------------|------------|-------------|------------|---------|---------|---------|---------|
| 0.8427722  | 0.16629795  | 1.18193171 | 0.21934192  | 1.14870484 | 0.18018 | 1.24342 | 0.49555 | 0.9163  |
| 0.9880994  | 0.581548945 | 0.96889756 | 0.98025046  | 0.46732285 | 0.19889 | 1.30969 | 0.38175 | 1.06031 |
| 0.92729875 | 0.696987446 | 0.7149599  | 0.52338218  | 0.76596593 | 0.65516 | 0.69674 | 0.65793 | 0.72724 |
| 1.06063309 | 0.581930678 | 0.91846162 | 0.86195543  | 0.38941491 | 0.80175 | 0.58703 | 0.36683 | 1.1691  |
|            | 0.803777028 | 0.61558779 | 0.68640992  | 0.68868605 |         |         | 0.51117 | 0.57862 |
| 0.65339100 | 0.29377492  | 1.18336673 | 0.12371592  | 1.61842531 | 0.20181 | 1.36515 | 0.92177 | 0.42799 |
| 0.86999796 | 0.412312755 | 1.033633   | 0.31758912  | 1.08374576 | 0.44049 | 0.97541 | 0.39891 | 1.10028 |
| 1.30396265 | 0.654924252 | 0.94035441 | 0.38032837  | 0.95199338 | 0.78325 | 0.74116 | 0.34547 | 1.20055 |
| 0.84039859 | 0.620014519 | 0.12536941 | 0.00102214  | 7.15004263 | 0.66338 | 0.55883 | 0.62753 | 0.12537 |
| 1.36197157 | 0.429170384 | 1.02379182 | 0.51908418  | 0.78131825 | 0.40369 | 1.02399 | 0.523   | 0.70185 |
| 0.89522283 | 0.629747921 | 0.96464149 | 0.8691109   | 0.57736584 | 0.92133 | 0.61728 | 0.37515 | 1.03519 |
|            | 0.576992942 | 0.99773301 | 0.87862019  | 0.28357551 | 0.4186  | 0.99781 | 0.15789 | 1.65851 |
|            | 0.581416385 | 0.9998778  | 0.63306303  | 0.55164162 | 0.4175  | 0.99988 | 0.34232 | 1.41569 |
| 0.79338241 | 0.71716692  | 0.78960279 | 0.39796192  | 0.88762559 | 0.75938 | 0.64156 | 0.54666 | 0.63167 |
| 0.71820112 | 0.408615416 | 1.05712896 | 0.94125248  | 0.58919332 | 0.05938 | 1.43154 | 0.63019 | 0.799   |
| 1.94362091 | 0.003948114 | 1.79383055 | 0.00734615  | 2.19136645 | 0.06119 | 1.48458 | 0.04957 | 2.27491 |
| 0.83564963 | 0.984117951 | 0.10393778 | 0.99535099  | 0.10193378 | 0.46627 | 0.96248 | 0.76053 | 0.49185 |
|            | 0.808268888 | 0.74963153 | 0.84862796  | 0.65385196 |         |         |         |         |
| 1.07171484 | 0.79376377  | 0.77267486 | 0.80061759  | 0.55929806 | 0.84589 | 0.68026 | 0.38297 | 1.16414 |
|            | 0.42596823  | 1.09448277 | 0.6399043   | 0.4938134  |         |         | 0.37367 | 1.12482 |
| 1.02940553 | 0.32840775  | 1.07864932 | 0.09482263  | 1.3221541  | 0.94096 | 0.42242 | 0.25124 | 1.15959 |
|            | 0.532389042 | 0.80654247 |             |            |         |         | 0.47508 | 0.80854 |
|            | 0.499635689 | 1.05134901 |             |            |         |         | 0.42358 | 0.6478  |
| 2.18961041 | 2.35996.11  | 5.56072262 | 8.1048E.07  | 8.2640931  | 2.8E.06 | 4.32896 | 1.2E.05 | 6.92633 |
|            | 0.524521602 | 0.35344433 |             |            |         |         | 0.48431 | 0.35744 |
| 0.66331175 | 0.6793501   | 0.61861757 | 0.57419237  | 0.61572958 | 0.69249 | 0.63357 | 0.45063 | 0.81133 |
| 1.28543784 | 0.399808273 | 0.9038403  | 0.66808971  | 0.6954886  | 0.48497 | 0.9438  | 0.23575 | 1.49795 |
| 0.95411884 | 0.561924553 | 0.98722326 | 0.43474045  | 0.66810889 | 0.42599 | 0.98408 | 0.24893 | 2.55825 |
| 1.38316657 | 0.633920435 | 0.93091772 | 0.80970705  | 0.6327353  | 0.90857 | 0.62373 | 0.17893 | 1.26949 |
| 1.11078224 | 0.436222753 | 1.04917015 | 0.6953238   | 0.4345074  | 0.36472 | 1.07839 | 0.62264 | 0.62395 |
| 0.36502985 | 0.53664708  | 0.56718935 |             |            | 0.6242  | 0.56106 | 0.50729 | 0.82271 |
| 1.15757097 | 0.613138668 | 0.95989579 | 0.43991169  | 0.86183843 | 0.43256 | 0.97701 | 0.82752 | 0.35716 |
|            | 0.491400569 | 1.00934591 | 0.55315115  | 0.69058866 | 0.81153 | 0.60104 | 0.37255 | 1.0559  |
| 1.71051322 | 0.022452989 | 1.62046382 | 0.07355461  | 2.49660185 | 0.07485 | 1.42324 | 0.05786 | 1.99323 |
|            | 0.62992923  | 0.80592985 | 0.69625647  | 0.51148617 | 0.17134 | 0.42971 | 0.92782 |         |
| 1.31103043 | 0.67076889  | 0.91521997 | 0.703445198 | 0.61045824 | 0.82271 | 0.4783  | 0.42458 | 0.96611 |
|            | 0.57311713  | 0.62664061 |             |            |         |         | 0.4583  | 0.82664 |
| 0.9149298  | 0.69859918  | 0.70240361 | 0.65722051  | 0.67890638 | 0.63566 | 0.71841 | 0.58929 | 0.72095 |
|            | 0.535837118 | 0.31988425 |             |            |         |         | 0.52897 | 0.31988 |
|            | 0.511065841 | 1.00119859 |             |            | 0.41704 | 1.0012  | 0.49186 | 0.85647 |
| 0.92440168 | 0.602193135 | 0.96419357 | 0.96017013  | 0.53535035 | 0.33559 | 1.06376 | 0.51236 | 0.91649 |
| 0.67083081 | 0.666667475 | 0.79389913 | 0.65027581  | 0.67989944 | 0.45541 | 0.93126 | 0.684   | 0.56603 |
| 0.67824552 | 0.735773385 | 0.68524468 | 0.46135378  | 0.71432398 | 0.53158 | 0.88672 | 0.76378 | 0.65913 |
| 0.58466688 | 0.740728071 | 0.90881957 | 0.21918156  | 1.13592962 | 0.91452 | 0.67366 | 0.9704  | 0.52025 |
| 1.98910496 | 0.177038882 | 1.30780403 | 0.2658023   | 1.31391451 | 0.46469 | 0.94382 | 0.15988 | 1.37167 |
|            | 0.197665482 | 1.4725761  |             |            | 0.50406 | 0.69403 | 0.23336 | 1.47282 |
| 1.07423323 | 0.37057346  | 1.11878616 | 0.67581524  | 0.59352231 | 0.59175 | 0.72764 | 0.27435 | 1.18329 |
| 0.90662114 | 0.95649663  | 0.9189152  | 0.53487168  | 0.7894322  | 0.81804 | 0.6163  | 0.33495 | 1.20632 |
| 1.3364134  | 0.452541691 | 1.02116234 | 0.69153909  | 0.6611501  | 0.39466 | 1.03346 | 0.58231 | 0.74032 |
|            | 0.725251523 | 0.56755457 | 0.80000864  | 0.32685914 |         |         | 0.43194 | 0.8282  |
|            | 0.156629556 | 2.06121812 |             |            | 0.63087 | 0.66658 | 0.06627 | 1.54956 |
|            | 0.342602714 | 1.15246953 |             |            | 0.609   | 0.64206 | 0.35642 | 1.13788 |
| 1.16954518 | 0.542133705 | 0.98230675 | 0.40572505  | 0.95174274 | 0.49774 | 0.9231  | 0.34314 | 1.26921 |
| 0.74090864 | 0.79154463  | 0.69136784 | 0.7079554   | 0.70111969 | 0.76936 | 0.68419 | 0.52196 | 0.78089 |
|            | 0.36885946  | 1.17581803 | 0.70170512  | 0.52024307 | 0.35707 | 1.26748 | 0.39887 | 1.28973 |
| 1.81730878 | 0.32810238  | 1.07306429 | 0.21454331  | 1.14269312 | 0.87252 | 0.69107 | 0.22159 | 1.20324 |
|            | 0.41488591  | 1.02253696 |             |            | 0.79216 | 0.3925  | 0.3899  | 1.03198 |
|            | 0.07333783  | 1.40327951 | 0.0465352   | 2.05816029 | 0.11926 | 1.47904 | 0.27494 | 1.18275 |
| 0.76364522 | 0.75596227  | 0.73239671 | 0.6262331   | 0.72746722 | 0.75308 | 0.72591 | 0.57733 | 0.78686 |
| 0.60199753 | 0.10678122  | 1.5280431  | 0.10287226  | 1.92985902 | 0.16455 | 1.39738 | 0.5523  | 0.74331 |
| 0.85098084 | 0.822712674 | 0.83290601 | 0.37058954  | 0.92876267 | 0.76359 | 0.78101 | 0.87481 | 0.58872 |
| 5.40103479 | 0.658775414 | 0.82922039 | 0.74911784  | 0.33588381 | 0.72898 | 0.7534  | 0.21056 | 2.66267 |
| 0.84945364 | 0.343170425 | 1.0885807  | 0.2966909   | 1.19383177 | 0.16057 | 1.5379  | 0.42416 | 0.95926 |
| 1.32332222 | 0.334672243 | 1.10180445 | 0.65107808  | 0.63542058 | 0.38106 | 1.06033 | 0.15532 | 1.83019 |
| 1.4574837  | 0.421317152 | 1.05926438 | 0.55572345  | 0.78315106 | 0.68019 | 0.65705 | 0.34023 | 1.09731 |
|            | 0.51795776  | 0.42964642 |             |            |         |         | 0.50757 | 0.42968 |
| 1.25081805 | 0.402956885 | 1.02841889 | 0.35739279  | 1.03791127 | 0.84892 | 0.6755  | 0.31028 | 1.09801 |
| 0.60365768 | 0.429896267 | 1.08524961 | 0.15209878  | 2.33993716 |         |         | 0.41996 | 0.92713 |
|            | 0.351324737 | 1.54880545 |             |            |         |         | 0.31557 | 1.54831 |
| 1.01957763 | 0.006001182 | 2.09055649 | 0.20473927  | 1.51836028 | 0.01012 | 0.27683 | 0.02359 | 7.0097  |
| 0.81174711 | 0.892344976 | 0.66057028 | 0.83399434  | 0.57645286 | 0.64676 | 0.82591 | 0.86489 | 0.60019 |
| 1.05184771 | 0.65384602  | 0.90026654 | 0.70363544  | 0.58718012 | 0.68892 | 0.67563 | 0.43562 | 0.95796 |
| 0.99426469 | 0.721346312 | 0.53101194 | 0.71318215  | 0.4654245  | 0.60209 | 0.6505  | 0.60418 | 0.52431 |
| 0.94766523 | 0.949494945 | 0.62034522 | 0.85953946  | 0.60892863 | 0.8842  | 0.63223 | 0.83889 | 0.61415 |
| 1.02962835 | 0.835658296 | 0.62216112 | 0.53582388  | 0.79302663 | 0.86415 | 0.60042 | 0.52908 | 0.85445 |
| 0.91403979 | 0.424430743 | 1.03940662 | 0.74167865  | 0.62123695 | 0.35711 | 1.05836 | 0.35861 | 1.8363  |
|            | 0.423501453 | 1.05116361 | 0.84956475  | 0.40075601 | 0.39239 | 1.0666  | 0.31237 | 1.19288 |
|            | 0.448208551 | 1.05582165 | 0.60918034  | 0.64558891 | 0.69266 | 0.69771 | 0.30986 | 1.17692 |
|            | 0.527909754 | 0.98549304 | 0.93723664  | 0.52663597 | 0.10767 | 1.94633 | 0.21266 | 1.70724 |
| 0.93156361 | 0.848193377 | 0.67957037 | 0.82992144  | 0.47733218 | 0.79596 | 0.73671 | 0.42395 | 0.66705 |
| 1.13166568 | 0.273466129 | 1.27375108 |             |            | 0.75712 | 0.63172 | 0.10194 | 1.80149 |
| 0.84366888 | 0.58098212  | 0.90030198 | 0.60731923  | 0.64722658 | 0.45098 | 0.93574 | 0.5154  | 0.83735 |
|            | 0.376490243 | 1.9837804  |             |            |         |         | 0.34401 | 1.98379 |
| 1.07613925 | 0.576173685 | 0.98166113 | 0.52087662  | 0.61217165 | 0.4258  | 0.98213 | 0.4675  | 0.88381 |
| 1.02831104 | 0.5611122   | 0.98933843 | 0.38221834  | 0.97716744 | 0.69602 | 0.80065 | 0.22141 | 1.21365 |



0.583509271 0.56607273 0.5416878 0.67873272 0.23336 1.68512 0.31906 1.27985
1.16110675 0.25841366 1.39547999 0.5416878 0.67873272 0.23336 1.68512 0.31906 1.27985
0.95328726 0.90518139 0.49678419 0.7420211 0.5008491 0.92691 0.49574 0.46463 0.86934
0.627237286 0.58740261 0.68979474 0.49227962 0.44518 0.77943
0.95196683 0.81466888 0.47371384 0.7958283 0.4032813 0.45998 0.85825
1.20142748 0.359627954 1.04216628 0.25810207 1.19544045 0.40148 1.025 0.51282 0.83745
1.50969441 0.805958478 0.6196542 0.78856452 0.60791886 0.69169 0.64734 0.60341 0.60037
1.48129115 0.633338982 0.60356958 0.56490876 0.68929424 0.64252 0.4123 0.45696 0.76591
0.64502602 0.9997097 0.22325388 0.99416612 0.22408482 0.99987 0.1872 0.94973 0.32702
1.75368218 0.543671881 0.97748217 0.99468002 0.31395631 0.139 1.65771 0.158 1.41786
1.551653873 0.81956227 0.85053187 0.39956272 0.45247 0.81926
1.29358716 0.726073863 0.76650305 0.85053187 0.39956272 0.47962 0.94442 0.40892 0.903
0.873429935 0.6386297 0.85539399 0.49169514 0.8244 0.67102
1.34541332 0.020342088 1.52424749 0.02251693 1.68738134 0.82226 0.74351 0.00998 2.82786
0.828441622 0.46217208 0.98340784 0.10380026 0.32785 1.53019
0.87608632 0.73991118 0.69182426 0.52849276 0.75829795 0.76591 0.68135 0.48115 0.8964
1.48670728 0.79525757 0.67365113 0.82307732 0.56815996 0.64438 0.77188 0.57093 0.83859
1.0794282 0.021198259 3.76536607 0.0676471 5.55723957 0.25591 1.88234 0.52435 0.78014
1.71254915 0.467679738 1.05411011 0.54920081 0.67947153 0.74388 0.38778 0.36364 1.16358
1.05950424 0.78748543 0.44033028 0.61574159 0.65121125 0.68915 0.64951 0.79099 0.61833
1.81019265 0.497857621 1.01120472 0.82403566 0.62422188 0.23886 1.2835 0.53353 0.85176
1.23114282 0.84316333 0.57402151 0.79158019 0.50364906 0.77867 0.5796 0.63748 0.68966
0.626250202 0.60977852 0.65735381 0.55148951 0.72014 0.42521 0.47114 0.84344
0.1776526 0.725289824 0.52999614 0.97809969 0.51127201 0.90722 0.67803 0.29824 1.08445
1.88046544 0.577195373 0.48741264 0.55733329 0.67659943 0.55065 0.70482 0.51647 0.49659
0.81779449 0.548867168 0.79044716 0.54126741 0.71552293 0.48749 0.84901 0.4809 0.85294
1.1073867 0.32634288 1.13990625 0.90314925 0.40724377 0.21936 1.49502 0.21577 1.2498
0.98050877 0.244375292 1.27151112 0.18624138 1.4586565 0.16025 1.64545 0.77302 0.619
1.30855699 0.522596603 0.79184824 0.60486245 0.657822206 0.79301 0.37393 0.48657 0.79185
0.797568449 0.51063962 0.649471 0.58865
0.98541044 0.501492617 1.0067286 0.64451827 0.70130347 0.10041 1.46759 0.94265 0.50457
0.60236398 0.558567944 0.9817907 0.21952651 1.12101875 0.96061 0.59883 0.68203 0.45066
1.33716431 0.052839378 0.82469014 0.61208116 0.57697171 0.43052 0.95147 0.58516 0.64313
0.464494398 0.05877136 0.7811972 0.37827809 0.33759 1.20321
1.14448404 0.722100112 0.81035681 0.38939932 0.65961062 0.75065 0.73394 0.42788 0.91823
0.97728494 0.42951394 1.00349714 0.95394453 0.56998783 0.26808 1.10534 0.40713 1.00175
0.83836123 0.535934658 0.99609026 0.3881885 0.9841329 0.20217 1.16506 0.7411 0.61713
1.08951655 0.063247749 1.31339802 0.00419847 2.07671984 0.46103 0.97027 0.25684 1.15232
1.15762116 0.379864408 1.12635991 0.46685882 0.4482561 0.53655 0.52364 0.3452 1.12901
0.79021891 0.909513268 0.664610338 0.82055268 0.62213686 0.1889 0.57832 0.989 0.8399
0.101865493 0.613406549 0.9898645 0.36979486 0.98985484 0.70961 0.79126 0.22882 1.97098
1.16883686 0.799773206 0.65833672 0.47377971 0.86321319 0.82923 0.61807 0.59955 0.78936
0.54843437 0.9947779 0.42872621 0.99621383 0.24357737 0.97778 0.42069 0.64707 0.81288
0.18741428 1.278969 0.11887763 1.85311657 0.33401 1.2453 0.31949 1.14854
0.6924663 0.70147581 0.74183287 0.71316852 0.6296051 0.62108 0.7632 0.45755 0.90099
1.87387145 0.57990726 0.87862642 0.8375268 0.5706206 0.44408 0.90849 0.47884 0.85365
1.18290396 0.678905789 0.57951858 0.50217389 0.72889063 0.50915 0.78801 0.69572 0.57758
0.543285376 0.56848012 0.00419847 2.07671984 0.46103 0.97027 0.25684 1.15232
1.20503283 0.587306813 0.67414101 0.57862322 0.69102707 0.45361 0.52082 0.44893 0.77488
0.29158314 0.3853996 0.64142554 0.35367026 0.73182664 0.52989 0.75791 0.49423 1.06399
1.05127526 0.210710697 1.33841284 0.23762209 1.38197338 0.46858 0.94163 0.20213 1.47543
0.93613773 0.441447108 0.1024871 0.56931902 0.8736048 0.7721 0.57962 0.39282 1.01845
1.14705277 0.765546675 0.73549161 0.8683313 0.5230535 0.66196 0.7936 0.23678 2.45138
0.364308182 1.90245721 0.3302 1.90246
0.7853508 0.71666084 0.84445423 0.64690011 0.69887088 0.71221 0.61197 0.5053 0.85445
1.06910463 0.363196466 1.12419691 0.69083362 0.69664005 0.45175 0.95379 0.13445 1.57998
1.47886282 0.110060586 2.27472385 0.36033 1.50433 0.09852 2.77357
1.20824008 0.910482048 0.69068901 0.61594808 0.83152122 0.71328 0.81385 0.94851 0.54744
0.62303882 0.71890181 0.6412085 0.49407443 0.8919486 0.4965 0.9243 0.8694 0.62924
1.31828863 0.514332862 0.98765383 0.61926052 0.9535466 0.41974 0.98792 0.44067 0.75609
0.57138773 0.61790855 0.9547552 0.38344826 0.9535466 0.53761 0.64935 0.54227 0.65446
0.86834582 0.576203886 0.61131126 0.5754523 0.60647604 0.51275 0.70296
1.10502864 0.73323248 0.3672449 0.75718042 0.3672449 0.26919 0.65045 0.26919 1.31354
0.448204155 1.052274 0.46563797 0.91929809 0.54982 0.65045 0.26919 1.31354
0.71560744 0.946138817 0.52799732 0.62550298 0.83243445 0.51271 0.94108 0.97756 0.68493
0.39072668 0.238955232 1.59752253 0.16497483 1.71655455 0.56669 0.50311 0.59298 0.54931
0.586831238 0.92836642 0.19465911 1.54584341 0.34648 1.48433 0.90906 0.52347
0.99707408 0.558162267 0.97284478 0.77806307 0.72399739 0.07087 1.4908 0.95714 0.50243
0.63236901 0.70787405 0.46777043 0.8384747 0.64601 0.49996 0.40038 0.61557
1.0389292 0.775541037 0.7923383 0.60254487 0.7725512 0.83948 0.6528 0.41538 0.92269
0.83534786 0.550083732 0.84620807 0.54202972 0.81396083 0.5212 0.88901 0.50411 0.86869
1.09865293 0.342794122 1.1437637 0.44297831 0.91563208 0.73051 0.76462 0.07949 1.74737
0.55494244 0.46838835 0.55849224 0.46838835 0.55849224 0.46838835 0.55849224 0.46838835 0.55849224 0.46838835
1.42235266 0.042029525 1.70782736 0.26877575 3.1087725 0.60394 0.86358 0.00822 2.04463
0.78434448 0.81151526 0.7661974 0.5257765 0.6477193 0.91389 0.75222 0.4379 0.94708
1.14705277 0.62302074 0.92564153 0.92564153 0.92564153 0.92564153 0.92564153 0.92564153 0.92564153 0.92564153
0.92569129 0.702681429 0.4830356 0.72730831 0.41227813 0.33637 1.11015 0.43937 0.70701
1.01640845 0.90398572 0.66817554 0.91532896 0.53517453 0.61085 0.86675 0.81017 0.67671
1.02400529 0.68578884 0.62476664 0.69261791 0.60226189 0.57745 0.67219 0.51816 0.83484
0.46374106 0.72813403 0.38537734 0.75235176 0.3749314 0.61205774 1.08283389 0.69093446 0.6742404 0.14074 1.43972 0.7935 0.63507
1.57934582 0.747465608 0.87559327 0.99185195 0.43316216 0.20644 1.20464 0.67427 0.80104
0.554778634 0.15980866 0.519862487 0.9644001 0.82082418 0.35155414 0.56957 0.68337 0.5512 0.15981
0.90342776 0.707411213 0.69292447 0.57131103 0.50080727 0.72038 0.6984 0.19088 2.46207
0.83957284 0.588743744 0.99908617 0.71219838 0.75834851 0.41869 0.99918 0.96692 0.51875
1.31218664 0.038516752 0.79278142 0.09949499 1.79278653 0.56126 0.8368 0.03243 0.04963
2.65787448 0.442328301 1.06600381 0.71836259 0.54688815 0.65528 0.67117 0.28782 0.21677
0.804747339 0.90410845 0.38071185 0.96834585 0.52192 0.7576 0.99918 0.21916
0.96889902 0.88308796 0.62727527 0.85991141 0.61074955 0.79741 0.64844 0.4705 0.7065
0.436776108 1.02973237 0.39954618 0.45387595 0.40382 1.03329 0.45564 0.86783













1.13659295 0.7095268 0.41303079 0.69308914 0.47008607 0.8304 0.57088 0.68894 0.13099

0.78561218 0.6726852 0.7728467 0.5249401 0.85804415 0.6861 0.76794 0.52711 0.80072

0.74864651 0.63619108 0.7226142 0.3968721 0.924417395 0.44012 0.548977 0.67141 0.65498

1.02577995 0.829529107 0.39563372 0.89300637 0.25684162 0.54198 0.75056 0.5575 0.79422

0.97630611 0.624603895 0.99161594 0.494443357 1.0084791 0.37411791 0.58766524 0.48544 0.78106 0.40522 0.99162

1.42924068 0.515697924 0.684962 0.420835162 1.00508016 0.35546133 1.00709545 0.45468 0.97542 0.97628 0.44847

0.66483836 0.048204966 2.44798812 0.35462832 3.45069135 0.15584 1.94712 0.31112 1.88843

1.00962867 0.442801655 1.03394467 0.59167897 0.74751049 0.83351 0.48258 0.31899 1.08416

0.91064771 0.419132965 1.05021897 0.94701317 0.58024995 0.05493 1.44002 0.65966 0.78205

0.9260459 0.437304999 1.00240377 0.69304376 0.71185636 0.76436 0.74096 0.40317 1.00271

0.49281338 0.335387507 1.14207038 0.29258651 1.14778015 0.4704 0.87076 0.49628 0.45138

0.96953522 0.64841231 0.9556155 0.38753665 0.96860419 0.7178 0.67732 0.67182 0.5768

0.9762298 0.308766874 1.60629509 0.4482152 0.46958 0.60631 0.49904 0.49277 0.49977 0.60631

0.94543365 0.583705124 0.78775621 0.96874603 0.52834041 0.61925267 0.74059338 0.98141 0.45758 0.41489 0.78776

0.72104398 0.980280674 0.5253938 0.8430443 0.53582719 0.66432 0.82205 0.77984 0.65118 0.99338 0.37536

0.7374101712 1.26648185 0.41971 0.34129 1.26648

0.87360301 0.47468255 1.04679488 0.52713953 0.78541729 0.35113 1.19825 0.71008 0.5655

0.619981692 0.65544742 0.56968128 0.65096037 0.59234 0.68254 0.56259 0.49925

0.82225115 0.555793127 0.98462026 0.18720037 1.15328742 0.45433 0.97751 0.98471 0.46345

0.94488839 0.636906376 0.71999706 0.50117651 0.7968064 0.62918 0.69603 0.57573 0.76201

1.51806787 0.88861406 0.4881868 0.71034967 0.4743758 0.90389 0.40611 0.65264 0.69302

0.91343785 0.5248443 0.521206123 0.68862965 0.63796014 0.82099888 0.41406 1.0022 0.49731 0.52443

0.64028784 0.459682843 1.00153381 0.63796014 0.82099888 0.41406 1.0022 0.49731 0.52443

1.22977029 0.647752923 0.8438994 0.71220773 0.44902364 0.86964 0.42986 0.45002 0.9088

0.89151314 0.334277312 1.05871309 0.16013055 1.20051654 0.32872 1.06282 0.94412 0.49785

0.85728806 0.78988187 0.74828287 0.73993484 0.72632986 0.60086 0.87888 0.77553 0.5965

0.486879017 1.03629732 0.68430042 0.51533295 0.67600771 0.71016 0.46091 0.2253 1.8903

0.277660738 3.55169515 0.99886178 0.53195302 0.94137806 0.56089843 0.99574 0.44805 0.8753 0.65098

0.98815796 0.559930388 0.98199208 0.30129158 1.09198022 0.99884 0.39377 0.09686 1.36529

1.19556476 0.890147882 0.52803127 0.62717841 0.56833938 0.91814 0.50169 0.4426 0.80407

0.97817675 0.672567993 0.91953179 0.78967185 0.70289424 0.21452 1.18491 0.95941 0.52516

0.8545946 0.778075582 0.66476262 0.59821818 0.7008558 0.68194 0.65646 0.752 0.66233

1.46189262 0.021534894 0.22870775 0.6034596 3.21659796 0.3574 1.20884 0.22016 1.63237

1.06872823 0.724902555 0.59762337 0.53787855 0.7560865 0.74722 0.58725 0.50418 0.71903

2.15161979 0.56825376 0.9396952 0.57222268 0.7359635 0.45975 0.96085 0.54306 0.85445

1.46649193 0.87220945 0.8184667 0.26201 1.39374 0.26201 1.39374 0.92922 0.27503

1.90654509 0.365530781 1.2968494 0.69984384 0.66270677 0.71016 0.46091 0.2253 1.8903

0.865962091 0.73870979 0.415293237 2.25384514 0.69984384 0.66270677 0.53309 0.90482 0.40909 0.75997

0.437302265 1.12787319 0.73504735 0.42283199 0.640221451 0.03378063 0.31247803 1.1185938 0.49452 0.65674 0.30337 1.36461

0.49770762 0.742977335 0.41762174 0.7436811 0.38550636 0.88166 0.38137 0.63349 0.49178

1.58903088 0.703104565 0.69991471 0.67796341 0.67714873 0.64788 0.69186 0.53304 0.85722

1.28837654 0.991274077 0.45197029 0.8124758 0.58856565 0.99604 0.41672 0.48867 0.75277

1.08448394 0.591761627 0.98283158 0.50630762 0.81092509 0.62412 0.79059 0.41709 0.98489

0.42920056 0.604431718 0.63969794 0.55362423 0.65808812 0.47966 0.29782 0.59597 0.63307

1.39795979 0.526841239 0.29762344 0.908134158 0.43700771 0.63217652 0.63856566 0.937 0.39916 0.48864 0.88097

0.73199759 0.544781559 0.98400483 0.88192521 0.54615384 0.37805 1.05539 0.64371 0.89922

0.88256662 0.397813588 1.44297779 0.519628741 0.98409579 0.76111775 0.4421121 0.905004805 0.5862365 0.53184615 0.8893918 0.48454 0.95747 0.26517 1.74228

1.18862101 0.435607507 1.08562327 0.47502502 0.7910728 0.29635 1.23807 0.76364 0.48834

1.27402388 0.366275106 1.06762479 0.2494974 1.10024951 0.70919 0.77701 0.90024 0.82726

1.36454792 0.714070688 0.88271967 0.64415749 0.61605553 0.68393 0.70715 0.5126 0.86633

1.50620183 0.745150182 0.83287719 0.61610232 0.65047463 0.952 0.2681 0.2472 0.95145

1.55035474 0.003971706 1.62610098 0.00137355 2.5053073 0.2603 0.15291 0.0078 2.05322

1.70892322 0.58308135 0.8774345 0.59121398 0.60962183 0.43893 0.90631 0.43893 0.90631

0.89280292 0.713809739 0.7781635 0.59175307 0.63619466 0.59028 0.88602 0.80402 0.71188

1.25668204 0.388662375 1.09559683 0.60231332 0.67577841 0.56623 0.84594 0.31898 1.13164

1.37510453 0.397748315 1.39356427 0.99349113 0.40011646 0.98494 0.52152 0.10617 1.3518

1.35489865 0.900851468 0.78088968 0.62728145 0.5953193 0.4347 0.98096 0.37844 1.03007

1.85613276 0.642345781 0.56368582 0.49683705 0.76278639 0.271178903 1.9667731 0.62548 0.56338

1.10292946 0.418303807 1.24541796 0.25483474 2.40308847 0.2261 1.96068 0.43925 0.8581

0.42622353 0.791090204 0.65512891 0.83460929 0.61615994 0.54088 0.88871 0.47928 0.78563

1.10309406 0.352265863 0.99549318 0.3140487 1.11883613 0.41084 0.9829 0.41084 0.9829

1.42683705 0.395064443 1.00112729 0.36367452 1.00714064 0.87964 0.65332 0.34194 1.08544

0.206002918 1.10885902 0.0879379 1.4192342 0.36709 1.04201 0.32609 1.13401

0.851125902 0.3252743 0.88270304 0.32118766 0.66269477 0.69906843 0.54447889 0.75978636 0.67167 0.69141 0.48889 0.59653

0.90128147 0.324574217 1.64220055 0.92645365 0.3384646 0.96466887 0.14890158 0.64748 0.66931 0.28573 1.6422 0.48075 0.75401

0.73764887 0.924811964 0.64312512 0.43726524 0.92459313 0.95844 0.50254 0.47753 0.88606 0.78567 0.65967

0.73886528 0.662458962 0.67983988 0.62028035 0.74949647 0.45849 0.94163 0.65986 0.46155

0.64817671 0.485650699 1.0366051 0.45948859 0.82185701 0.52954 0.94163 0.35312 1.44021

1.23235524 0.308995042 1.84047987 0.396849921 1.01344138 0.31718964 1.09708333 0.41386 1.0088 0.2572 1.73976

1.09712496 0.57586122 0.84349215 0.45780629 0.88452006 0.51415 0.83787 0.43305 0.78389

1.48448885 0.466486201 1.06256927 0.48781519 0.8274146 0.66471 0.54409 0.38423 1.17718

1.01230158 0.607071221 0.9925744 0.61010178 0.72881939 0.76992 0.75562 0.4094 0.99403

0.8890783 0.457598612 1.03036845 0.87257981 0.58875696 0.50475 0.93925 0.2474 1.15272

0.8890783 0.701458118 0.92393389 0.75391611 0.67493544 0.9738 0.54203 0.32195 0.70741

0.98078094 0.45390993 0.0397921 0.9697132 0.60714986 0.08985 0.41362 0.47995 0.77935

1.20512676 0.573454185 0.98437746 0.68852004 0.47123613 0.36261 1.2015 0.41157 0.9808

0.733591977 1.39853234 0.75441365 0.53613465 0.55084 0.79927 0.08824 2.10458

0.65479013 0.58500917 0.8143551 0.43869191 0.85251628 0.61386 0.76124 0.57439 0.65818

2.23079798 0.963230397 0.27186183 0.9108123 0.23100888 0.76394 0.20367 0.92506 0.20516

1.01844993 0.633942841 0.96671173 0.3796013 0.97288417 0.70019 0.49135 0.17951 0.35884

1.33421909 0.99750738 0.26894226 0.59101475 0.6337207 0.99949 0.25922 0.99949 0.25922

0.8280414 0.398828389 1.11216823 0.13938487 0.2514706 0.43909 0.93774 0.43909 0.93774

1.34253016 0.44408265 1.04084673 0.67391331 0.52049262 0.60415 0.51684 0.38772 1.06065

0.79462327 0.622405903 0.93515851 0.3910253 0.94466171 0.62833 0.63776 0.53388 0.70654

0.76461278 0.38571313 1.26583204 0.29885431 1.07935521 0.13679522 1.50453301 0.61386 0.76124 0.3545 1.26983 0.35775 1.04647





1.47492558 0.24091974 1.14699007 0.18491663 1.49320917 0.34779 1.09 0.3339 1.12424  
0.51754158 0.9832431 0.42208 0.98314 0.51784 0.56247  
0.33616136 1.80991048 0.29861 1.80991  
1.3510021 0.5220561 0.9239181 0.47722 0.92806 0.48723 0.89377  
0.62537369 0.70311517 0.82497588 0.20391 0.36897 0.20391 0.36897  
0.62539753 0.30287876 1.08661786 0.30249859 1.07646725 0.24462 1.27961 0.64002 0.68341  
0.98754883 0.82444377 0.65115383 0.55114877 0.73149855 0.59899 0.56114 0.59878 0.68821  
1.44752113 0.20009912 2.03142313 0.0095801 2.61069862 0.10977 1.40082 0.00267 2.76043  
0.76694909 0.4698337 1.00721974 0.33808878 1.0271726 0.53513 0.92583 0.98987 0.51472  
1.23262964 0.36092086 0.74454023 0.60339489 0.82330418 0.52188 0.92843 0.29747 1.0098

1.25619099 0.40925304 1.07135691 0.79939413 0.63781698 0.16342 1.90372 0.3514 1.11007  
0.386287319 1.02994812 0.35317761 1.03039228 0.4166 0.50839  
1.28923282 0.75761443 0.84554921 0.54688132 0.82994705 0.99509 0.57482 0.31351 1.15228  
2.97374891 0.24022198 1.15353531 0.92544656 1.13389555 0.45663 1.93494 0.17829 1.71486  
0.77012024 0.382256046 1.05851431 0.2718175 1.09475274 0.52861 0.90468 0.75924 0.65731  
1.68405463 0.233039298 1.15940336 0.05989364 1.88039038 0.66166 0.71666 0.35313 1.07341  
0.998365015 2.0821157 0.99968 0.20821

0.91691919 0.923955291 0.62923462 0.75054101 0.72758548 0.53625 0.92116 0.94984 0.53426  
2.08334909 0.315148846 1.04984836 0.32049253 1.0414618 0.07091 1.51724 0.98879 0.66256  
1.2883206 0.258274684 1.0542889 0.33831557 1.02740243 0.0112 1.90165 0.78845 0.47393  
1.00184584 0.534655859 0.75180312 0.2718175 1.09475274 0.52861 0.90468 0.50713 0.901

0.92363093 0.566157564 0.75706436 0.56702949 0.66274204 0.70034 0.75185 0.47683 0.86873  
0.568274101 0.66274204 0.564111656 0.4478278 0.56215 0.44787  
0.417953118 1.11744762 0.60457037 0.52430066 0.45544 0.97513 0.81752 0.61854  
0.72365607 0.88233259 0.72554512 0.79594773 0.45544 0.97513 0.81752 0.61854  
0.127486249 2.92946208 0.0884254 2.92946208 0.45544 0.97513 0.81752 0.61854  
0.256325254 1.19587322 0.26599839 1.19591931 0.5522 0.59835 0.25195 1.58216  
0.81254209 0.38833344 1.05483401 0.26898997 1.09213723 0.86962 0.66522 0.58445 0.47393  
0.047638962 4.93088082 0.02342053 4.93058082 0.60137 0.76381 0.56994 0.78929  
1.47983132 0.602219176 0.773198 0.20891 1.53304 0.46275 0.83452  
0.41591916 1.4688149 0.00022359 3.1163997 5.5E-05 3.77563 0.00016 3.73094  
1.20950779 3.9838E-08 3.50154909 0.00022359 3.1163997 5.5E-05 3.77563 0.00016 3.73094  
2.38560114 0.484821998 1.00597281 0.74485047 0.65447752 0.7531 0.7265 0.31632 0.88766  
0.5682528 0.652171229 0.9408904 0.46624341 0.80875125 0.42565 0.97307 0.91024 0.3364  
1.03551129 0.804060071 0.69648108 0.71912861 0.67765516 0.71862 0.67774 0.70354 0.7269  
0.99774681 0.219404711 1.4523274 0.4261833 0.9485165 0.16129 1.274 0.23715 1.6636  
0.9512810 0.37399576 1.0470889 0.34417366 1.0470889 0.96259 0.53361 0.45037 0.95929  
0.71478554 0.81609598 0.73173844 0.51097978 0.8266335 0.24819 1.1442 0.99921 0.2671  
1.0283607 0.824593863 0.8385633 0.84237357 0.63999784 0.62041 0.75606 0.17159 4.9284  
0.87722266 0.084193199 1.52549124 0.05969264 1.71090293 0.62041 0.75606 0.17159 4.9284  
0.71615821 0.51732496 0.56164741 0.42623 0.56104 0.42623 0.56104 0.49449 0.67348  
2.00068537 0.455332055 1.1069447 0.15226781 0.78915947 0.25786 1.16701 0.7032 0.54265  
0.599938162 0.91905053 0.86073073 0.57055476 0.42624 0.78863 0.49137 0.65839  
0.93752488 0.262443919 1.33466597 0.50782825 0.84774723 0.17745 1.43927 0.62076 0.66885  
0.81324298 0.021106473 1.5292337 0.05263 1.81607445 0.11354 1.40123 0.07565 1.51084  
1.5072796 0.14166564 2.0429276 0.103331 1.3186 0.10333 1.3186 0.12017 0.61122  
1.05581997 0.571971926 0.8054668 0.06040955 1.41869978 0.6962 0.8005 0.47165 0.88604  
0.98126596 0.509757728 1.11382283 0.509757728 1.11382283 0.33352 1.11384 0.50246 0.79364  
0.96059021 0.23200264 1.0969184 0.23200276 1.07249863 0.81778 0.70304 0.01747 1.79296

2.80901729 0.001482211 2.00874044 0.04028617 1.76196577 0.02643 1.92639 0.06678 2.51614  
0.78147778 0.585064393 0.99775841 0.59745127 0.85171706 0.42069 0.99795 0.72508 0.78505  
1.12640773 0.91954886 0.48980127 0.94920672 0.47572505 0.48635 0.92817 0.4749 0.65946  
0.99153674 3.26325E-05 7.2017346 0.00053294 3.43081664 0.04294 1.8969 0.01013 2.80377

0.84497183 0.3198335 1.1305535 0.61446456 0.81755154 0.05625 1.50199 0.90842 0.5557  
1.00100357 0.498816485 1.00768617 0.48195112 0.89424748 0.31821 1.11444 0.85374 0.55344  
0.93153413 0.484497479 0.01682803 0.484497479 0.01682803 0.99486 0.46707 0.00326 2.27052  
0.70605283 0.996311405 0.47483715 0.119272402 2.15751328 0.55263 0.94816 0.98307 0.47296  
0.17788 2.06784 0.14626 2.24685

0.58990105 0.601259207 0.87980863 0.58952109 0.71128444 0.44875 0.89528 0.43361 0.90405  
0.52884823 0.861419997 0.65049314 0.77579523 0.68337741 0.84743 0.99164 0.46794 0.89066

1.24436326 0.593323403 0.9922001 0.57446436 0.76913365 0.58447 0.8194 0.48807 0.99256  
1.35199665 0.735216772 0.82936053 0.42402102 0.92974438 0.74959 0.72908 0.6242 0.78938

3.71629739 0.324080612 1.06993494 0.13207382 1.30342198 0.83923 0.67477 0.37442 1.04899  
1.66774476 0.29036175 1.49074031 0.22207 1.34208 0.15367 2.33416

0.98433189 0.642369828 0.41835882 0.672874914 0.9142523 0.73362271 0.68201536 0.94628 0.56932 0.6535 0.41836  
0.55322871 0.88456589 0.451724709 0.01615879 0.61743853 0.76803761 0.69012 0.79 0.37861 1.02946  
1.16749482 0.958770284 0.57710423 0.41729799 0.6926338 0.98221 0.50813 0.63966 0.82151  
1.36203475 0.429862971 1.00029212 0.38432395 0.76138017 0.94322 0.44645 0.40367 1.0003  
2.56388704 0.460002906 1.00853094 0.61004645 0.74727641 0.80767 0.65323 0.39436 1.01537  
1.40437086 0.751506902 0.83812904 0.97512904 0.48571506 0.78265 0.66993 0.28477 1.19498

1.17631657 0.366446644 1.04317288 0.28174477 1.06938933 0.95295 0.61223 0.11796 1.31237  
0.56492024 0.84922256 0.624655948 0.66202181 0.54001796 0.40818 1.10186 0.71094 0.73436  
0.95339234 0.364178294 0.0155077 0.37949 0.07777 0.39684 0.13033

0.73468869 0.508484965 1.10062014 0.31525 1.10102 0.64628 0.38162  
0.87894198 0.976878366 0.47717578 0.52863568 0.89408967 0.5452 0.92294 0.99064 0.38478  
1.19880952 0.59811914 0.9939959 0.69006676 0.61628651 0.58855 0.70858 0.40674 0.99436  
0.9516914 0.55724292 0.9840055 0.8024849 0.5208238 0.43289 0.9777 0.38804 0.9691  
1.20542327 0.41313928 1.05636614 0.45543143 0.89075612 0.3477 1.08097 0.59831 0.82762  
2.16133048 0.49636027 0.01260289 0.74898645 0.63278945 0.3275 1.15755 0.62208 0.65592  
0.32023748 0.04751529 1.41053812 0.0968341 1.4078286 0.64434 0.86208 0.01665 1.90535

1.30719549 0.435360602 1.08491144 0.39541 1.0625 0.35787 1.20662  
0.619396251 0.93542404 0.72932132 0.68902894 0.92523 0.59503 0.17104 1.30048

1.22331614 0.460199947 1.02398448 0.4347448 0.94846924 0.85734 0.72066 0.13266 1.28537

0.3899253 1.0152924 0.35904407 1.0152924 0.35904407 0.45875 1.6574  
0.3931971 0.6972967 0.4761956 0.76788071 0.37451 1.05721 0.31191 1.16199

1.66390518 0.226903916 1.13692313 0.12014605 1.5781578 0.37451 1.05721 0.31191 1.16199

0.72817097 0.098222815 2.97617452 0.06098394 2.97617452 0.40076 1.02978 0.80826 0.46475  
0.502621707 1.01568448 0.40076 1.02978 0.80826 0.46475

0.421001569 1.63472606 0.00184573 1.9129993 4.7E-05 3.22418 0.39499 1.63473  
0.010667884 1.83436161 0.00093764 2.54677785 0.63747 0.86701 0.05555 2.46498  
0.449233449 1.00417838 0.80991348 0.57460802 0.41299 1.00505 0.44624 0.94807  
0.376552096 4.62621617 0.32357894 4.5794474 0.5185 0.16488 0.5185 0.16488  
2.46739564 0.455402192 1.02087344 0.68804524 0.59584954 0.68052 0.6163 0.38219 1.03922

0.8123288 0.369794961 1.07286409 0.29256665 1.09864113 0.56109 0.8382 0.65248 0.7347  
0.361158864 1.06362441 0.32199349 1.0739974 0.43833 0.95027 0.29105 1.496

1.24946164 0.698702122 0.89014541 0.74027 0.71179 0.42876 0.95012  
0.830077358 0.548404838 0.66058197 0.548404838 0.66058197 0.39564 0.66058  
2.71517683 2.3962E-05 3.72989595 0.00601758 4.66026062 0.00211 3.80766 0.00156 3.32861





0.43737883 1.037118 0.52575986 0.70648568 0.58582 0.76104 0.40103 1.04332  
0.27262995 1.04842301 0.00532504 4.88337183 0.03548 2.66181 0.3925 1.0176  
0.52546054 0.59539919 0.55297321 0.99869758 0.40331205 1.95214764 0.4832 0.5954  
1.73742255 0.857200649 0.48163645 0.70514955 0.72978465 0.53127 0.92263 0.07712 1.61002  
0.83875343 0.58500892 0.94238716 0.57170057 0.59883886 0.37664 1.59515 0.87533 0.63035  
1.34584009 0.541689016 0.75859058 0.1235276 1.47272914 0.45165 0.78409 0.54102 0.63927  
1.20097519 0.275512481 1.22963329 0.9033782 0.19248194 0.70714 0.64982 0.48054 0.91667  
0.84292628 0.667846414 0.9661807 0.31400437 0.97647509 0.83934 0.55665 0.40999 0.91053  
0.76181815 0.92052494 0.6413207 0.65050821 0.7032579 0.79853 0.73039 0.42027 0.44986  
1.37813885 0.445089149 1.03626306 0.2389652 1.21440657 0.7016 0.74381 0.43631 0.95499  
1.06314628 0.821051291 0.55737299 0.49516888 0.78514174 0.86339 0.50918 0.5469 0.8539  
0.9794862 0.769368172 0.64119713 0.7017873 0.57131224 0.71785 0.47881 0.46754 0.74888  
2.97410486 0.238106432 1.14621982 0.20870168 1.35975488 0.38119 1.08434 0.30548 1.2206  
0.86495788 0.417995561 1.02942135 0.88790897 0.63217762 0.28386 1.1209 0.34809 1.05253  
0.4794862 0.52953952 0.31666614 0.428092071 1.02116275 0.4028 1.02125  
1.07454988 0.414968472 1.07583652 0.47838531 0.76494355 0.65148 0.58586 0.37515 1.12261  
1.0213596 0.510914096 1.00010075 0.96534023 0.15512351 0.66743 0.69571 0.36016 1.05754  
0.88144475 0.74876491 0.73915351 0.46009123 0.85216984 0.82488 0.58455 0.84596 0.93451  
0.68001843 0.95938341 0.45184657 0.91972539 0.93406 0.54249 0.41624 0.98274





0.9316437  
0.73575008  
1.65820525  
1.46351052  
0.64420815  
0.86475747  
0.52328867  
1.19290339  
0.51339564  
0.48545888  
0.96367946  
1.03879197  
0.88439955  
0.63515982  
0.89841004  
1.1247303  
0.85518059  
0.97343964  
0.8139995  
0.74640099  
1.01129714  
1.22435842  
1.38620871  
1.09327619  
1.35737768  
1.01687147  
1.0189302  
0.97512377  
0.9408625  
2.59615762  
2.36204177  
1.04644211  
3.7855897  
1.90465127  
0.81030664  
1.7664364  
1.02712678  
1.8074306  
1.02917773  
0.8551669  
1.08530718  
0.71272078  
0.91052584  
0.69150279  
0.83914969  
1.01042964  
0.81691736  
1.12999647  
1.615116  
1.37958403  
1.05351789  
0.7822787  
0.87984311  
1.02689241  
0.99695828  
0.80298176  
1.25395285  
0.47833244  
0.83011602  
1.59442729  
0.89007352  
2.87455407  
0.73057853  
1.24761736  
1.86526296  
0.9214046  
0.76519577

0.620771146  
0.13768603  
0.575003363  
0.94319819  
0.5842477  
0.42535961  
1.0509187  
0.581344601  
0.61022828  
0.532694483  
0.952925686  
0.59794314  
0.424378838  
0.548224402  
0.67553718  
0.476602089  
0.10338617  
0.090048035  
1.75781539  
0.494991794  
1.00222812  
0.22464603  
1.31849081  
0.521717966  
0.99488909  
0.66579859  
0.79885024  
0.384316931  
1.00508735  
0.401561919  
1.11148864  
0.450518916  
1.0178124  
0.261714284  
1.26385583  
0.19048399  
1.31645531  
0.719563141  
0.7200397  
0.63432488  
0.64522623  
0.6956622  
0.59926989  
0.57493556  
0.6337207  
0.9079703  
0.41119153  
0.9337846  
0.79035  
0.68876  
0.77280687  
0.70628699  
0.62407  
0.84808  
0.60518  
0.66656  
0.69449  
0.67371  
0.32197  
1.06486  
0.47259  
0.79406  
0.40049  
1.17735  
0.35939464  
1.00484675  
0.84908  
0.72193  
0.56066  
0.67707  
0.35346  
1.13336  
0.78529808  
0.57856212  
0.19048399  
1.31645531  
0.64312488  
0.64522623  
0.70017  
0.71476  
0.70692  
0.82266  
0.14934  
1.36497  
0.95363  
0.53773  
0.70232  
0.69886  
0.56411  
0.54406  
0.74158  
0.76523  
0.54089  
0.87513  
0.4272939  
0.5001642  
0.57676  
1.0184  
0.48231  
0.73466  
0.9341  
0.52021  
0.6151459  
0.77783596  
0.42877  
0.87396  
0.24256  
1.15673  
0.62370885  
0.82655209  
0.85029  
0.70899  
1.0834  
1.23601  
0.85508  
0.63752  
0.73556  
0.53068  
0.45946  
0.94279  
0.5219086  
0.81709231  
0.47047  
0.90828  
0.57648  
0.69915  
0.740048635  
0.81419954  
0.678854  
0.71368508  
0.86387  
0.64242  
0.34359  
1.21527  
0.656028127  
0.55749816  
0.56648545  
0.69468486  
0.66438  
0.48829  
0.361715291  
1.8231453  
0.5394441  
0.69813379  
0.48774718  
0.7579008  
0.49886  
0.75987  
0.43699  
0.88893  
0.905229086  
0.58436154  
0.8822411  
0.54616236  
0.81748  
0.56652  
0.64355  
0.73729  
0.81299216  
0.81731822  
0.85204811  
0.60405171  
0.4516  
0.86993  
0.86221  
0.60498  
0.80353518  
0.4861514  
0.84343011  
0.62913241  
0.445476  
0.82863  
0.87529  
0.62417  
0.63502379  
0.83478377  
0.70063896  
0.45068911  
0.59165  
0.72106  
0.44446  
0.92601

0.57559  
0.71517  
0.43601  
0.993  
0.17104  
1.44818  
0.42522  
0.90972  
0.98628  
0.42066  
0.57407  
0.68987  
0.57935  
0.70435  
0.38631  
1.05897  
0.54921  
0.19107  
0.18225  
1.42997  
0.62407  
0.84808  
0.60518  
0.66656  
0.69449  
0.67371  
0.32197  
1.06486  
0.47259  
0.79406  
0.40049  
1.17735  
0.35939464  
1.00484675  
0.84908  
0.72193  
0.56066  
0.67707  
0.35346  
1.13336  
0.78529808  
0.57856212  
0.19048399  
1.31645531  
0.64312488  
0.64522623  
0.70017  
0.71476  
0.70692  
0.82266  
0.14934  
1.36497  
0.95363  
0.53773  
0.70232  
0.69886  
0.56411  
0.54406  
0.74158  
0.76523  
0.54089  
0.87513  
0.4272939  
0.5001642  
0.57676  
1.0184  
0.48231  
0.73466  
0.9341  
0.52021  
0.6151459  
0.77783596  
0.42877  
0.87396  
0.24256  
1.15673  
0.62370885  
0.82655209  
0.85029  
0.70899  
1.0834  
1.23601  
0.85508  
0.63752  
0.73556  
0.53068  
0.45946  
0.94279  
0.5219086  
0.81709231  
0.47047  
0.90828  
0.57648  
0.69915  
0.740048635  
0.81419954  
0.678854  
0.71368508  
0.86387  
0.64242  
0.34359  
1.21527  
0.656028127  
0.55749816  
0.56648545  
0.69468486  
0.66438  
0.48829  
0.361715291  
1.8231453  
0.5394441  
0.69813379  
0.48774718  
0.7579008  
0.49886  
0.75987  
0.43699  
0.88893  
0.905229086  
0.58436154  
0.8822411  
0.54616236  
0.81748  
0.56652  
0.64355  
0.73729  
0.81299216  
0.81731822  
0.85204811  
0.60405171  
0.4516  
0.86993  
0.86221  
0.60498  
0.80353518  
0.4861514  
0.84343011  
0.62913241  
0.445476  
0.82863  
0.87529  
0.62417  
0.63502379  
0.83478377  
0.70063896  
0.45068911  
0.59165  
0.72106  
0.44446  
0.92601

0.35657348  
1.02181036  
0.23838693  
1.23866649  
0.39198  
1.03359  
0.3927  
1.01403  
0.41045293  
1.1307043  
0.59919694  
0.76638851  
0.594590336  
0.91550008  
0.62365701  
0.60077216  
0.47052  
0.82129  
0.43079  
0.93373  
0.75524826  
0.77670741  
0.90633119  
0.38612866  
0.43802  
0.94325  
0.41154  
0.72879  
0.492378937  
1.01198305  
0.83289009  
0.61497511  
0.28681  
1.14993  
0.46656  
0.92754  
0.428419314  
1.02907064  
0.83289748  
0.51520359  
0.29635  
1.2907  
0.38855  
1.03644  
0.646249974  
0.87973692  
0.80324806  
0.34728779  
0.62734  
0.73051  
0.26573  
1.22304  
0.361435582  
1.14445661  
0.58468436  
0.68127521  
0.62734  
0.73051  
0.26573  
1.22304  
0.41508168  
1.0126576  
0.47914951  
0.80131796  
0.23557  
2.02986  
0.40035  
1.01125  
0.70023832  
0.62598192  
0.53426369  
0.79120113  
0.72554  
0.58655  
0.47583  
0.87623  
0.42913878  
1.04598717  
0.65225999  
0.58410728  
0.642007  
0.76115  
0.34404  
1.08085  
0.585257969  
0.9393317  
0.52772832  
0.82413268  
0.79973  
0.66568  
0.36256  
1.13304  
0.001090167  
2.2290745  
0.00295534  
3.20003836  
0.00518  
1.0205  
0.09374  
1.52351  
0.442653512  
1.08477355  
0.72141784  
0.61823758  
0.69823  
0.6179  
0.17077  
1.66338  
0.700554636  
0.90316357  
0.6700398  
0.78222753  
0.24947  
1.14956  
0.90905  
0.38399  
0.972601245  
0.15767605  
0.98672016  
0.15767605  
0.770383678  
0.70701928  
0.80385881  
0.61772144  
0.61717  
0.82421  
0.52362  
0.89126  
0.577056531  
0.91424479  
0.46148577  
0.33640645  
0.5433  
0.64264  
0.42853  
0.91998  
0.62100885  
0.98562626  
0.37132976  
0.98564995  
0.642007  
0.76115  
0.34404  
1.08085  
0.479271991  
1.01993713  
0.49605257  
0.84642136  
0.76772  
0.62204  
0.34306  
1.0812  
0.591160015  
0.94843883  
0.52747322  
0.81709231  
0.92188  
0.54987  
0.27033  
1.17509  
0.028460795  
2.22737702  
0.02006921  
3.27389662  
0.24199  
1.90781  
0.11966  
1.77849  
0.689079991  
0.46687858  
0.69209191  
0.4397804  
0.41131  
0.54814  
0.60813594  
0.95209152  
0.81432713  
0.44285956  
0.78833  
0.72196  
0.32759  
1.8883  
0.37359  
1.8883  
0.390088637  
1.06686223  
0.74979972  
0.65067019  
0.38544  
1.06459  
0.25695  
1.28454  
0.54145481  
0.99336003  
0.38303166  
0.97720644  
0.84406  
0.62929  
0.04359  
1.81945  
0.843694476  
0.86013248  
0.68820023  
0.74617374  
0.48323  
0.94082  
0.86755  
0.58742  
0.40381429  
1.20929268  
0.5735226  
0.7823938  
0.81123  
0.66761  
0.27317  
1.54545  
0.586447753  
0.97710397  
0.36869839  
0.96464513  
0.56204  
0.75922  
0.32976  
1.20087  
1.25395285  
1.18453499  
0.58071516  
0.71755012  
0.67158  
0.72466  
0.19115  
1.38072  
0.7882715  
0.58821484  
0.3078022  
0.57978181  
0.451544  
1.00131  
0.96269  
0.3973  
0.87984311  
0.866980788  
0.56905688  
0.80091444  
0.58239508  
0.50385  
0.90778  
0.82937  
0.55597  
0.681346811  
0.83873924  
0.83840159  
0.64605581  
0.357  
1.21233  
0.451117933  
1.02825142  
0.77335507  
0.66014255  
0.33872  
1.07185  
0.46591  
0.81253  
0.444433252  
1.03589663  
0.62802356  
0.74914205  
0.76961  
0.74631  
0.24566  
1.15351  
0.781262341  
0.92217  
0.48038341  
0.9151772  
0.81949  
0.9676  
0.52025  
0.427930017  
1.08220148  
0.79520288  
0.55894606  
0.29362  
1.28296  
0.3301  
1.29397  
0.72291169  
0.82251158  
0.9637104  
0.40278201  
0.51956  
0.90022  
0.08885  
1.89924  
0.955007971  
0.63026268  
0.64993771  
0.85332418  
0.62071  
0.8524  
0.60074  
0.8524  
0.316592807  
1.17410489  
0.45486404  
0.90323459  
0.46308  
0.94035  
0.22033  
1.2747  
0.7882715  
0.58821484  
0.3078022  
0.57978181  
0.74078022  
0.57978181  
0.52762  
0.78823  
0.754085407  
0.57436542  
0.77467693  
0.57900527  
0.57393  
0.37977  
0.68477  
0.46319  
0.625000267  
0.94395399  
0.38536782  
0.95159661  
0.68477  
0.46319  
0.12761582  
1.21924205  
0.91168428  
0.62882209  
0.18376  
1.19189  
0.0071  
1.99233  
0.210346151  
1.15004014  
0.1176219  
1.27038811  
0.98732  
0.51417  
0.0093  
1.92645  
0.170030543  
1.412888526  
0.63719525  
0.7149144  
0.57574  
0.80966  
0.07444  
1.61065  
0.861983697  
0.25682828  
0.89454428  
0.24837039  
0.53195  
0.63216  
0.762320001  
0.82644584  
0.90055001  
0.5251694  
0.87552  
0.5979  
0.460839249  
1.02808594  
0.66655702  
0.62923137  
0.90419  
0.54454  
0.05655  
0.25248  
0.806680664  
0.5625639  
0.3745336  
0.57695788  
0.83076  
0.52471  
0.54512  
0.83043



1.37454058 0.93124703 0.47665937 0.95702682 0.4708422 0.50368 0.90267 0.52495 0.82564
0.91642967 0.88626874 0.67242161 0.5661287 0.85671817 0.83485 0.70534 0.85855 0.54779
0.68002288 0.185472591 1.28959789 0.26156109 1.18423261 0.42457 0.84801 0.06348 2.63395
1.10726041 0.164003526 1.21243447 0.06771027 1.55900818 0.65075 0.83359 0.25801 1.14988
0.409302522 1.10773051 0.78389 0.58382 0.25883 1.36407
2.53707682 0.000208139 3.1899362 0.03802 5.42914 0.00311 3.12957
1.1206988 0.72503416 0.7127241 0.54753 0.80541 0.7148 0.68671
2.6342263 0.461611869 1.00414279 0.65448389 0.73008101 0.89944 0.62972 0.39698 1.00747
0.512677347 0.99558825 0.646569478 0.54435155 0.34408 1.72114
0.36135962 1.4424243 0.49042187 0.76489261 0.49187 0.81587 0.32336 1.66949
1.88013508 0.000205765 2.11160098 0.02313266 1.83749547 0.01153 1.90339 0.00098 2.99491
1.46158603 0.159943877 1.33293681 0.08904914 1.40984418 0.01515 0.90339 0.57863 0.8697
0.83895277 0.474887326 1.09667931 0.29729 1.11811 0.67843 0.56694
0.425827927 1.07333886 0.40056 1.07334
0.97911925 0.623068474 0.55238657 0.62348218 0.56569363 0.55225 0.31665
0.533759902 0.97782847 0.84323518 0.36147053 0.46514 0.62855 0.38489 1.11051
0.333202041 1.15204997 0.31942165 1.13588903 0.36798 1.43347
0.538081623 0.67886405 0.53160483 0.67886405
1.21774888 7.54301E-07 13.5913173 9.4E-06 10.8015 3.5E-06 18.6173
1.56728034 0.19097873 1.25175641 0.91721 0.66954 0.00138 2.54662
1.18739492 0.47526898 1.1138803 0.357 1.1332 0.57599 0.81177
1.3832771 0.101444398 1.37773487 0.69964894 0.79531005 0.0213 1.6261 0.49496 0.93366
0.286620847 1.11414291 0.45713591 0.90503216 0.34587 1.07157 0.1945 1.38403
0.89161296 0.212151784 1.6771461 0.5840617 0.66746902 0.14198 1.81407
1.21899691 0.09831576 1.54187911 0.09022701 1.63130026 0.22283 1.42938 0.35963 1.38144
1.24564026 0.527934399 0.98961131 0.77347019 0.630274 0.85108 0.65191 0.1718 1.2903
1.22200254 0.639621245 0.99568393 0.36754045 0.99621616 0.42542 0.71551 0.98979 0.31436
0.97426112 0.037878296 1.51978387 0.78446369 0.70638875 0.02058 1.82886 0.02439 1.85725
0.003461347 2.45881818 0.00615122 2.64224393 0.17279 2.20118 0.03814 2.29264
0.91807877 0.572742323 0.84899749 0.61408 0.84393 0.45757 0.87333
0.91624903 0.488214534 1.02954623 0.19825 1.22334 0.96593 0.32789
1.27100395 0.985560361 0.43917211 0.99565957 0.26204312 0.71592 0.70465 0.83835 0.56214
0.55155394 0.550638409 0.82581039 0.45818649 0.83937075 0.53065 0.4709
2.16499573 0.378730912 1.20338199 0.4977878 0.85619934 0.53188 0.70975 0.34237 2.12123
0.363434546 1.829719091 0.32922 1.8292
1.43039914 0.33927365 1.1691076 0.56572071 0.79486151 0.20942 1.35202 0.42856 0.90573
1.0884376 0.57376587 0.83885634 0.51767503 0.70299131 0.53283 0.88336 0.54451 0.81006
0.88541411 0.163202129 1.26034965 0.02817794 2.19756186 0.33805 1.08531 0.60599 0.68904
1.46143999 0.664068354 0.90732706 0.91234 0.62327 0.27137 1.9197
2.1969744 0.008113427 3.4953008 0.0717 2.19726 0.0713 2.46844
1.21439131 0.59974406 0.77499904 0.39762 1.11371 0.65956 0.53761
0.80204338 0.91151743 0.99988371 0.06379 1.45821 0.99492 0.64636
1.30522824 0.50058637 1.01304839 0.39167 1.02824 0.79842 0.61004
1.09072667 0.264853424 1.16153345 0.75628097 0.72392454 0.12084 1.28589 0.50955 0.92355
0.81618556 0.54400991 0.98372256 0.69761166 0.76243369 0.14991 1.25331 0.95774 0.53353
2.03202737 0.063331204 1.62834257 0.23842218 1.4307175 0.69615 0.67386 0.01785 2.06881
0.62134716 0.52726752 0.62907948 0.52726752
1.53379016 0.362050051 1.0941538 0.45182696 0.91271033 0.67418 0.80688 0.2193 1.19773
0.999471 0.32871768 1.1259471 0.30969419 1.11637701 0.38246 1.39806
1.47578963 0.06173682 1.3936895 0.02657376 2.14844908 0.17046 1.32988 0.28043 1.1743
0.91249131 0.59974406 0.77499904 0.54701 0.8872 0.64317 0.60489
0.93131609 0.09185398 1.44946468 0.14352 1.48221 0.14192 1.42429
4.14339647 0.573619066 0.69119193 0.55311 0.73329 0.43643 0.63142
0.944374993 0.39688965 0.96665 0.39699
1.1003027 0.737858281 0.92504036 0.40229572 0.96916684 0.99891 0.32737 0.15266 1.3162
0.7777805 0.214989415 1.39187113 0.15941411 1.42637711 0.54071 0.83408 0.47709 0.77166
2.58110967 0.074110469 1.56379441 0.0727699 1.55010942 0.57131 0.70953 0.15488 1.70526
2.1856252 0.309881127 3.2079226 0.309881127 3.2079226 0.00106 3.64267 0.26953 2.0709
0.000562087 3.43330624 0.00008 3.0395
1.73872469 0.503281675 1.02184043 0.40106 1.02287 0.57262 0.78493
0.066514109 1.42389098 0.15958 1.21258 0.00687 1.98707
0.91826629 0.061356544 1.66493764 0.04888351 2.00720828 0.08359 1.93072 0.3458 0.94807
1.17419593 0.503089263 1.00327332 0.59148461 0.75214361 0.84412 0.5945 0.3865 1.06201
1.01233087 0.443382444 1.09581281 0.57078307 0.68768296 0.7126 0.63299 0.23844 1.51199
0.99826203 0.513688959 0.99811055 0.39434 1.01515 0.97392 0.49696
1.4284831 0.01208323 2.7186492 0.00112 2.35134 0.02077 4.54918
0.8818017 0.515945911 0.7881355 0.5487 0.78929 0.49229 0.63076
0.402229912 1.14409909 0.37339 1.14406
0.65763564 0.43857162 1.3250908 0.24856 1.51608 0.6976 0.38292
1.17746255 0.453709412 1.02075147 0.72293558 0.66758841 0.5983 0.7848 0.37721 1.03971
1.7634393 0.579591196 0.95453247 0.56617388 0.7539858 0.44041 0.9639 0.45134 0.91675
1.09108598 0.121196849 1.4413566 0.15943994 1.36464141 0.25161 1.46976 0.18435 2.25993
0.690028786 0.37543474 0.70831291 0.37543474
0.336154522 1.83823529 0.2986 1.83824
0.409289151 1.54288096 0.28127 1.54388
0.404413185 1.16596924 0.3759 1.16597
1.22068679 0.991204138 0.5962844 0.99846008 0.25109466 0.9991 0.35499 0.05211 1.78004
1.05487283 0.59300313 0.99946607 0.59300313 0.99946607 0.404 0.99947
0.8074503 0.75369509 0.59071483 0.58310824 0.95255 0.52415 0.33422 1.20506
1.35804937 0.436450206 1.03184987 0.74776 0.54777 0.37733 1.06494
0.76035186 0.64440323 0.57149622 0.75002216 0.76412 0.61315 0.62492 0.68841
1.04899431 0.096768284 1.31863378 0.14425066 1.34223362 0.95259 0.59857 0.00013 1.66887
1.08363382 0.428974804 0.10181488 0.55215488 0.80240805 0.66901 0.65959 0.39485 1.01192
0.335602889 1.3627211 0.43437 0.72034 0.30556 1.52156
1.01972234 0.662718024 0.92013671 0.99998342 0.01283888 0.38727 1.05435 0.60126 0.602
1.036178 0.899914807 0.58959865 0.76788169 0.1076878 0.76788169 0.57961 0.76776
2.26453604 0.00953193 1.88298307 0.10762887 2.73241337 0.05084 1.56006 0.01174 1.00858
1.89434838 0.00844372 1.57066793 0.03719559 1.79486604 0.15195 1.24925 0.00512 2.38664
1.45463514 0.61081826 0.96349483 0.69376511 0.38429289 0.96376511 0.53492 0.60635
0.430935783 1.01811923 0.6295327 0.52824485 0.40136 1.01915
1.06124559 0.37300504 1.21679715 0.51825 0.21671 0.38491 1.21955







1.42721946 0.341877122 1.24615027 0.43430197 0.85986239 0.67532 0.63263 0.15462 1.76751  
0.78907382 0.27337358 1.18597901 0.2738862 1.19481272 0.32743 1.117174 0.32743 1.117174  
0.74256564 0.416657091 1.01642111 0.32955347 1.02651585 0.73189 0.80681 0.74301 0.6102  
1.37766372 0.403316455 1.04824813 0.36324043 1.05381205 0.85114 0.22472 0.28531 1.77725  
0.540799763 0.56010978 0.46521 0.56011  
3.40390442 0.18044893 3.43166059 0.42803999 1.00045517 0.5528887 0.68929424 0.37527 1.10358 0.13491 3.43166  
0.42803999 1.00045517 0.5528887 0.68929424 0.37527 1.10358 0.13491 3.43166  
1.31572602 0.368801092 1.13999439 0.72670318 0.55008387 0.4863 0.91045 0.25679 1.23764  
0.8569614 0.395375469 1.08695884 0.69087071 0.73055667 0.53896 0.88832 0.26886 1.8054  
0.92365796 0.880102728 0.67926899 0.71120496 0.75024383 0.89326 0.6496 0.52742 0.62216  
0.81899067 0.6061355 0.98288626 0.37440954 0.98060045 0.68182 0.78034 0.29857 1.59313  
0.85312741 0.464861633 1.02451505 0.56854662 0.77188085 0.36706 0.06692  
0.75488063 0.430708338 1.27390241 0.46452266 0.80875125 0.56882 0.72496 0.30263 2.08544  
0.84287392 0.33957829 1.05977821 0.331381616 1.05859502 0.46362 0.94846 0.32323 1.09763  
0.63178559 0.426242119 1.04306746 0.64177381 0.8178119 0.13392 1.25217 0.88236 0.65372  
1.20022468 0.249454085 1.23602238 0.19935541 1.25682318 0.5503 0.88182 0.37809 1.53496  
0.73463941 0.00565335 2.44923004 0.00606599 2.4933009 0.45414 0.89131 0.00976 2.44921  
0.81003449 0.413090643 1.18814133 0.59525669 0.66839993 0.55209 0.77391 0.31912 1.37175  
0.717231025 0.63114929 0.80202656 0.34885614 0.88889 0.56126  
0.81217819 0.891266376 0.57638356 0.51237007 0.81217254 0.51647 0.91727 0.88849 0.56126  
1.12065842 0.163228078 1.36162374 0.49552412 0.74276683 0.2343 1.26383 0.15359 1.56658  
2.25954998 0.295623801 1.29434645 0.65044501 0.66199873 0.46256 0.90631 0.16266 1.5662  
0.368502558 1.82919491 0.33495 1.8292

2.17081791 0.419375555 1.07115037 0.46837778 0.81350317 0.44362 0.96102 0.14434 1.81112  
0.90784144 0.421341097 1.04105645 0.5865148 0.79468757 0.33701 1.06904 0.65911 0.78466  
0.90359548 0.809674937 0.73653854 0.69109926 0.74807569 0.6829 0.81226 0.79782 0.58308  
0.558487749 0.96745686 0.47176425 0.8881116 0.3726 1.22451 0.41589 0.93776  
0.97360718 0.25331968 1.8110284 0.53730767 0.6967678 0.3232 1.73841  
0.76530538 0.714488901 0.86673128 0.00470925 2.34326449 0.99963 0.34513 0.48111 0.87934  
0.7222701 0.42930695 1.0470543 0.48071615 0.78292754 0.55679 0.71022 0.39911 0.05008  
1.45275985 0.997814313 0.46049729 0.99970798 0.26356517 0.98728 0.43451 0.35887 1.1892  
2.05709786 0.03849545 1.4220948 0.5581572 0.87137067 0.12066 1.28408 0.02076 1.77351  
1.0284243 0.584276942 0.81073099 0.50623426 0.79941376 0.58463 0.72067 0.45843 0.87732  
0.896032173 0.45332344 0.99844 0.41015 0.43365 0.87849  
1.15478999 0.84556218 0.57118225 0.68262517 0.65778916 0.5464 0.79049 0.86155 0.51949  
0.14279617 0.70222911 0.76512245 0.768154 0.46484912 0.60015 0.81503 0.36055 1.67003  
0.48981366 0.511838978 0.99960642 0.99141537 0.44591764 0.0492 1.47361 0.51772 0.90206  
0.80842671 0.58280064 0.84056227 0.55937142 0.43665 0.78042

1.21219314 0.17093321 1.14737931 0.19129217 1.23263019 0.29086 1.11247 0.27123 1.12841  
1.09979758 0.386822693 1.27073013 0.0457094 4.47730396 0.89616 0.30311  
1.13939796 0.009966119 2.02298584 0.04429304 7.88220669 0.20063 1.40174 0.00391 3.15566  
1.08551383 0.55433846 0.97433957 0.56148063 0.81012103 0.88422 0.65258 0.23596 1.19966  
0.776453492 0.36382548 0.80353926 0.36382548 0.57402559 0.8844954 0.8232466 0.29517471 0.37286 1.20995  
0.68041619 0.63816102 0.93147129 0.74555451 0.64482561 0.58735 0.73959 0.43573 0.96861  
1.89581148 0.559665444 0.84880251 0.44306724 0.84880251 0.55879 0.55879 0.43003 0.43707 0.75113  
0.79522445 0.63564096 0.94271114 0.72255188 0.74276286 0.29723 1.1045 0.94062 0.54044  
0.517725994 0.97840597 0.44545 0.91679 0.40325 1.47803  
0.261467515 1.10910833 0.31540713 1.0812718 0.37253 1.09011 0.21937 1.41854  
0.90264729 0.59301011 0.99826429 0.52840151 0.60674243 0.47151 0.84793 0.40433 0.99827  
1.33270622 0.572651293 0.97513752 0.0290897 0.88394976 0.54077 0.88634 0.34276 0.6865  
1.21534296 0.091358682 1.50067144 0.092629895 1.66584548 0.47634 0.93573 0.15284 1.43989  
0.42981072 0.96491993 0.46409607 0.63814207 0.07095 1.55859 0.5878 0.43302  
0.189814814 1.64606175 0.13731222 1.94888305 0.32454 1.43003 0.43707 0.75113  
0.97273406 0.759487298 0.76479738 0.81570396 0.64746971 0.52835 0.88077 0.41341 0.89823  
0.427291024 1.95838433 0.42025 1.95838  
0.94192297 0.735857492 0.8728174 0.44327111 0.93871078 0.246 1.19026 0.99176 0.38721  
0.77494386 0.26433541 1.23655412 0.54444198 0.8421844 0.49428 0.9373 0.21078 1.25011  
1.00289488 0.468301224 1.0307109 0.83464432 0.54581064 0.22048 1.3516 0.29223 1.02834  
0.44496991 0.334342407 1.02167938 0.30230758 1.08138776 0.40473 1.01019 0.10858 1.44356  
1.15878561 0.38302569 1.08824567 0.56503458 0.81001942 0.74041 0.73554 0.26689 1.23086  
1.6171527 0.582403087 0.99565797 0.84848298 0.6709664 0.30127 1.08519 0.40994 0.99527  
2.46248557 0.342128695 1.12366498 0.53545534 0.85572846 0.74977 0.78317 0.10796 1.44846  
0.52502227 4.40109E-06 4.26407993 0.5485E-05 9.50652493 0.05425 2.02716 5E-05 5.73942  
1.262199 0.597746049 0.90085905 0.40322814 0.90280259 0.49893 0.78419 0.53256 0.86813  
0.454779126 1.03191134 0.70020127 0.73511995 0.80496 0.71173 0.18012 1.23646

0.366481149 1.81372994 0.145931804 1.19536198 0.18929346 1.17601148 0.82182 0.73169 0.32588 0.81373  
0.420951553 1.05901824 0.6892561 0.56949144 0.59326 0.74389 0.33959 1.0964  
1.06603314 0.594271656 0.94673312 0.63794964 0.73152201 0.96179 0.4781 0.13475 1.36283  
1.17511641 0.597389865 0.98603809 0.66761963 0.6022266 0.59373 0.60277 0.409 0.98744  
0.88468201 0.580157228 0.83845255 0.58674241 0.77165798 0.51724 0.79205 0.41904 0.83845  
1.75613802 0.586356219 0.78314956 0.58674241 0.77165798 0.51724 0.79205 0.51392 0.88573  
1.06617E-05 3.2212169 0.00011908 4.22370593 0.02296 2.30104 0.00152 3.31032  
0.787531794 0.34419222 0.81648241 0.34408884 0.49039 0.443  
0.81095319 0.459631904 1.04935011 0.42927976 0.90991253 0.60543 0.80784 0.29937 1.27275  
0.528032398 0.32884866 0.528032398 0.32884866 0.51981 0.32885  
0.56035087 0.89897732 0.56035087 0.89897732 0.37834 1.63624  
0.62050941 0.91197415 0.84908205 0.43962505 0.25745 1.24416 0.47363 0.61638  
1.5970959 0.199774493 1.400189 0.4824401 0.87372881 0.13785 1.45019 0.52559 0.82578  
1.08802021 0.437251734 1.05193815 0.68824636 0.72221712 0.75118 0.68183 0.21318 1.24584  
1.0374564 0.44570265 1.0495432 0.73854987 0.90258192 0.47741 0.85298 0.33965 1.11559  
1.15533746 0.432789472 1.05250228 0.57969415 0.74348143 0.55879 0.83275 0.38099 1.07137  
1.07617475 0.480457306 1.01980052 0.88438515 0.54929424 0.62702 0.85738 0.16398 1.31558  
0.669229538 0.66581978 0.68485721 0.64304105 0.50216 0.867 0.50884 0.85847  
0.525899271 0.42622278 0.579477317 0.93387382 0.52640452 0.7065121 0.51731 0.42622  
0.757689826 0.92532218 0.50711683 0.73491588 0.42135 0.93496 0.42308 0.92544  
0.533015394 0.73722306 0.52433345 0.7065329 0.49024 0.81133  
0.698964415 1.0453309 0.62702711 0.55210806 0.3534 1.8965 0.3534 1.8965  
1.17195896 0.589982059 0.9783841 0.57617777 0.73867774 0.42936 0.98217 0.43289 0.92555  
1.42100708 0.5811532 0.92697869 0.5575729 0.70294351 0.451819 0.9988 0.44998 0.91688  
0.66138103 0.412358139 1.08485889 0.45544497 0.82407127 0.53259 0.81901 0.72726 1.09705





0.7629049 0.55739549 0.65634724 0.36888979 1.07323178 0.11298347 1.28130933 0.6243 0.87211 0.44556 0.66635  
0.87349953 0.640847516 0.84808154 0.68294126 0.2386155 0.83209 0.50215 0.82519 0.69147  
1.28536945 0.41889968 1.081518 0.4393541 0.89160538 0.69006 0.7005 0.26247 1.24499  
1.28630634 0.37831975 0.89531261 0.5864725 0.79947203 0.86674 0.57746 0.62641 1.70266  
2.24769515 0.420349911 0.10503105 0.48445637 0.91423083 0.77705 0.74512 0.23538 1.16233  
0.433891322 1.15524911 0.45713231 0.81901701 0.45713231 0.81901701 0.38915 1.20895  
0.317324063 1.10661021 0.32888814 1.09910303 0.39231 1.08675 0.33575 1.48234  
0.079676404 1.77207119 0.0496154 2.00044883 0.079676404 1.77207119 0.35163 1.28184  
0.009824334 1.69703509 0.00546811 2.19966583 0.09912 1.44272 0.20877 1.45782  
0.61478194 0.546416824 0.78776477 0.36091832 1.00521474 0.61379 0.75719 0.67561 0.65362  
0.74673481 0.42876506 1.00693613 0.92057418 0.49197055 0.30316 1.08138 0.39045 1.00788  
1.60269448 0.576466436 0.99377124 0.37616672 0.98954605 0.44332 0.98072 0.04438 1.90166  
0.526366522 0.69775375 0.51785725 0.69775375 0.51785725 0.69775375 3.4E-06 4.27281 3.4E-06 7.30633  
1.47977326 0.98196611 0.58108855 8.7921E-06 8.85663962 0.5E-06 4.27281 0.39444 1.03037  
0.329752962 0.33807708 1.05303843 0.23783847 1.16144605 0.61758 0.43471 0.28169 0.88839  
0.92128599 0.226166264 1.13652591 0.13544216 1.2289644 0.30436 1.12218 0.86839 0.47461  
1.50242084 0.703214333 0.75025143 0.7467810 0.60775 0.7467810 0.60775 0.43565 0.89486  
1.0088557 0.124569334 0.65764634 0.13064 0.84114 0.13064 0.84114 0.21319 1.50776  
2.54506301 2.01608E-05 0.34861482 0.00157 3.50184 0.00157 3.50184 0.00042 3.24661  
1.01902523 0.60465007 0.96892362 0.59878884 0.8215955 0.34261 1.05403 0.96884 0.55844  
0.71454645 0.544473202 0.88366534 0.46735451 0.8505344 0.50226 0.87303 0.47632 0.90724  
0.5679065 0.467347854 0.10151217 0.3343222 1.07654422 0.54146 0.66298 0.41524 0.96667  
0.53963175 0.59252357 0.93685409 0.62398338 0.77513885 0.88664 0.57096 0.2214 1.32291  
0.77437111 0.477363105 0.01416884 0.72386658 0.63481611 0.71805 0.60029 0.37773 1.04658  
1.27776399 0.536133219 0.81350317 0.4706818 0.81350317 0.4706818 0.81350317 0.42443 0.99549 0.37187 1.35732  
1.47241714 0.12745201 2.45447483 0.08581673 2.45447483 0.96323 0.49025 0.36262 2.87074  
0.66223306 0.494924165 1.00112626 0.60487429 1.9919333 0.46547 0.93467 0.20031 1.5506  
0.49564353 1.25724962 0.338884 1.27379 0.41818 0.27207  
1.0309219 0.56646318 0.96664904 0.50367757 0.87249972 0.81017 0.72154 0.34645 1.10389  
1.96324163 0.002595207 2.54321026 0.00232837 3.47085365 0.02579 2.18056 0.34406 1.45214  
1.39640888 0.643604262 0.93264949 0.56902823 0.60262531 0.96355 0.59067 0.22408 1.16382  
1.86748141 0.24122858 1.49849848 0.52262381 0.80347956 0.56513 0.64778 0.18018 1.55253  
0.52328701 0.432797461 1.02176384 0.26503207 1.08652632 0.9459 0.62162 0.32189 1.07032  
0.06273889 0.6969808 0.0280631 5.49868098 0.0280631 5.49868098 0.86198 0.63791 0.41023 0.87259  
2.0628486 0.261884728 1.209582 0.01478539 2.14238156 0.01118 2.25585 0.00215 2.51457  
1.2462343 0.51742E-05 2.42032766 0.00278621 2.46930192 0.58194 0.66594 0.58479 0.78841  
1.69477861 0.61118396 0.91841273 0.41717395 0.93553966 0.02260398 5.76884503 0.02260398 5.76884503  
1.06321273 0.526741024 0.9930213 0.0171102 5.76884503 0.88738581 0.62188889 0.25318 1.12569 0.66349 0.82638  
0.96169427 0.022879408 2.59240563 0.00993765 3.89160191 0.14898 1.78384  
0.26564911 0.105829483 2.18880158 0.06724289 2.18880158 0.37181 1.0347 0.62066 0.75472  
1.23542838 0.495339716 1.0302713 0.515410479 0.80241219 0.57803 0.80394 0.53882 0.7968  
0.79239476 0.004226018 2.4800655 0.00157 2.61304 0.02264 2.28081  
0.85240119 0.78930913 0.49603003 0.91073762 0.99913 0.37226 0.1668 1.28712  
0.447265007 1.02295399 0.6121271 0.74929449 0.59347 0.72978 0.40275 1.0305  
0.56927298 0.9880364 0.3782421 0.9779951 0.30292 0.33731 0.3943 1.9997  
0.049848474 1.19283767 0.02079419 1.73089399 0.00147 2.30002 0.35571 1.03822  
0.83517652 0.280109542 1.13261704 0.1289807 1.30692138 0.23892 1.23808 0.93278 0.47736  
0.69393144 0.517612078 0.9962056 0.1801875 1.2823855 0.71942 0.78971 0.95017 0.53457  
1.0608308 0.515131025 1.00424594 0.00993765 3.89160191 0.01184 2.02316 0.65166 0.38448  
0.460384831 1.02637512 0.3604524 1.01073366 0.80102 0.72355 0.24473 1.18583  
0.38026701 1.01167464 0.3604524 1.01073366 0.26923 1.62721 0.37362 1.42586  
0.087488533 3.22410862 0.05236752 3.22410862 0.05236752 3.22410862 0.45941 0.45234  
0.545737889 0.4523432 0.5452332 0.40586841 0.96933504 0.81437 0.70368 0.25564 1.24719  
0.73158822 0.595148408 0.9713758 0.40586841 0.96933504 0.81437 0.70368 0.25564 1.24719  
1.48094795 0.126186595 1.1507892 0.08290879 1.40473891 0.03089 1.69633 0.34502 1.24409  
1.52080869 0.201968072 1.43208042 0.21795197 1.5417513 0.26916 1.69825 0.24904 1.61716  
1.06608528 0.007502496 2.4815884 0.03648929 3.58129463 0.00614 2.51938 0.56743 0.72864  
1.05452325 0.013682521 1.66610679 0.03419697 1.71343676 0.13549 1.43461 0.04873 2.0207  
0.8766495 0.057745079 1.74246523 0.0171068 2.21296504 0.36797 1.17611 0.50037 0.80565  
0.70252425 0.02881031 0.0263664 0.29462494 2.40422103 0.00614 2.51938 0.56743 0.72864  
0.92214698 0.510749392 1.01079798 0.40603 1.0108 0.50836 0.75869  
0.80052556 0.64505844 0.83893399 0.83999959 0.52764305 0.21943 1.7381 0.68809 0.59485  
1.0456023 0.49024608 1.00852983 0.38655084 0.95020955 0.64768 0.80847 0.25595 1.17063  
1.02919272 0.367017791 1.11569293 0.47829366 0.87109554 0.30929 1.13882 0.40858 0.75383  
0.72738493 0.597407223 0.9834807 0.43534492 0.84974159 0.3579 0.47885 0.40398 0.98426  
1.69681621 0.419309565 1.06157098 0.49736111 0.88126073 0.76983 0.7761 0.16581 1.32122  
1.68877968 0.010562236 2.16729573 0.00822 1.85892 0.00217 1.13019  
1.59315308 0.439420511 1.15453681 0.21349 1.38853 0.81316 0.42517  
1.7720508 0.381612396 1.064308 0.55168846 0.77428959 0.39908 1.04377 0.27566 1.46638  
0.002015834 2.78119062 0.06568085 3.68681002 0.04448 3.1477 0.04279 2.14205  
0.381533913 1.20613467 0.52085359 0.79140798 0.34678 1.21221  
0.98355236 0.60666393 0.99248277 0.37266354 0.99126475 0.44059 0.97477 0.29377 1.14464  
1.83291125 0.44961688 0.95188236 0.71722107 0.6819812 0.31757 1.15731 0.4476 0.56422  
1.22704495 0.58621448 0.70684622 0.55808557 0.7369885 0.55245 0.71388 0.552 0.63577  
0.90483515 0.50002294 1.04019978 0.38347 1.04271 0.57282 0.7311  
0.75256838 0.896613565 0.70163255 0.61096 0.88782 0.93061 0.59886  
1.01802498 0.003323289 2.63872012 0.00055 2.97436 0.0349 2.16907  
0.77430923 0.328838439 1.10274924 0.45634516 0.93633806 0.25717 1.12915 0.65503 0.45532  
0.90460754 0.617001216 0.99442166 0.85475565 0.62655674 0.78764 0.71576 0.405 0.99575  
0.96709974 0.464054429 1.01081398 0.34357078 1.03298764 0.97924 0.39071 0.32481 1.18663  
1.10222185 0.358217542 1.02960423 0.2681831 1.12306962 0.61577 0.81297 0.38434 1.02019  
0.94645206 0.08114633 1.71549807 0.00126 2.38613 0.00226 2.38613 0.05737 1.9844  
1.6462437 0.655991516 0.71562144 0.87135 0.46884 0.23808 2.15978  
1.80799196 0.471003493 1.11218859 0.279807 1.2485 0.279807 1.2485 0.37511 0.78602  
0.8904359 0.52093922 0.9926907 0.24811 1.12552 0.9355 0.57883  
0.075074834 1.97784582 0.11922 2.04749 0.1224 1.92039  
0.67702204 0.010232458 1.76687558 0.0030166 2.66741997 0.17812 1.29829 0.08929 2.17434  
0.8060388 0.252492406 1.06938003 0.30940059 1.04614306 0.13691 1.26341 0.64799 0.82089  
0.358124112 1.44502928 0.19860524 1.12689949 0.2917446 1.07547158 0.09863 1.39182 0.32322 1.44503  
1.24481214 0.234036532 1.24353225 0.64710436 0.78457043 0.11977 1.38535 0.46841 0.92289  
1.13918117 0.011351886 0.5613119 0.0188695 1.27299916 0.01106 1.74876 0.84843 0.88813  
1.2365507 0.01669544 8.3379468 0.0657564 8.34720186 0.49038 0.47749  
0.09185124 3.8497997 0.05583558 3.8497997 0.49177 0.90787 0.52424 0.77578  
0.78369194 0.532854939 0.8316994 0.264197393 4.23561631 0.22018 4.23562  
0.30131418 1.20099247 0.14811103 2.17647289 0.3962 0.08454

0.60840334 0.9525274 0.38600993 0.9525274  
0.20231284 1.4284501 0.20218317 1.36029113  
0.10623527 3.050163 0.07070511 3.02810424  
1.65165488 0.248247625 1.416649071 0.18119 1.48953 0.33319 1.29171  
0.71312717 0.261878045 1.36582203 0.26046 1.21799 0.35332 1.12187  
1.97247688 0.363825283 1.06971372 0.65860867 0.71381689 0.35461 1.06162 0.24989 1.54041  
0.94727992 0.629076229 0.77422876 0.52320921 0.5617864 0.63233 0.74889 0.54746 0.84886  
0.503058 0.169591983 1.28375745 0.16350688 1.39238684 0.37649 1.10553 0.19151 1.70197  
0.578242906 0.77136601 0.697894983 0.47500604 0.91121152 0.16887419 0.49292 0.42627 0.44435 0.77204  
0.697894983 0.47500604 0.91121152 0.16887419 0.49292 0.42627 0.44435 0.77204  
0.285913432 2.39956401 0.24343 2.39956  
1.0969168 0.016733488 1.57187132 0.02813225 2.16509918 0.03604 1.6401 0.20473 1.27087  
1.08003494 0.999930292 0.29515368 0.90251083 0.48867135 0.99992 0.21075 0.98864 0.32122  
0.82468105 0.46733086 1.01037354 0.33866431 1.03346684 0.73254 0.63723 0.8979 0.55472  
0.709922501 0.26243713 0.7309 0.26244  
0.76452568 0.36292499 1.0533042 0.31915182 1.05716282 0.55383 0.84029 0.46621 0.91334  
1.29387793 1 0.05383348 0.99999825 0.03831541 1 0.05104 0.99999 0.07295  
1.07967214 0.792672195 0.58495949 0.77490741 0.36404948 0.74638 0.65045 0.49317 0.90294  
0.92022535 0.65006256 0.73234743 0.5512179 0.74573231 0.62137 0.75944 0.60582 0.63749  
0.057146643 1.72380881 0.08062477 2.16838732 0.24149 1.31294 0.06461 2.88673  
0.77107998 0.796142172 0.7993617 0.66127463 0.77796088 0.46249 0.96895 0.88837 0.60566  
0.97610665 0.837606978 0.75022158 0.68974226 0.7546434 0.73022 0.79143 0.79613 0.69545  
1.51959789 0.384948896 1.06835374 0.57904553 0.60886335 0.39406 1.09048 0.38855 1.0633  
0.83224594 0.000161743 1.50984883 0.00057018 6.00805546 0.01036 1.87084 0.00675 3.29547  
1.674358 0.12468193 1.48455082 0.12468193 1.48455082 0.20078 1.25832 0.03087 2.12756  
1.17584189 0.44849729 1.26493731 0.25971035 1.51561079 0.85812 0.44263 0.12709 1.61778  
0.49171548 0.422171996 1.0483562 0.03270733 1.56883045 0.66586 0.84143 0.96106 0.53778  
1.20704986 0.558796655 0.95961738 0.5526419 0.770406 0.84838 0.59626 0.27332 1.24811  
0.61394304 0.440265498 1.01939384 0.35649727 1.02130251 0.96484 0.29215 0.54542 0.75419  
0.85610721 0.634113143 0.96783445 0.37792128 0.97208447 0.89319 0.39396 0.34114 1.20181  
1.2490133 0.311931997 2.13426031 0.44963225 0.80952477 0.14559 2.4971  
0.14310536 0.252980206 1.47344292 0.29236763 1.48292713 0.46599 0.6227 0.46599 0.6227  
1.2490133 0.055369097 1.41378616 0.17548012 1.23354425 0.53171 0.9264 0.01834 1.98157  
0.36884968 1.9155267 0.36884968 1.9155267 0.36884968 1.9155267 0.36884968 1.9155267  
0.376921469 1.38472734 0.376921469 1.38472734 0.376921469 1.38472734 0.376921469 1.38472734  
0.347805182 1.62795193 0.347805182 1.62795193 0.347805182 1.62795193 0.347805182 1.62795193  
0.705252606 0.73448876 0.705252606 0.73448876 0.705252606 0.73448876 0.705252606 0.73448876  
0.71284644 0.445225618 1.06607678 0.10594654 2.20635283 0.62205 0.84325 0.67061 0.78685  
1.21942612 0.427549621 1.03784953 0.32010261 1.08148246 0.91059 0.52678 0.20531 1.50002  
1.9863954 0.000164312 1.64650771 0.00418999 2.67462779 0.02621 0.67148 0.00073 3.05171  
1.92015839 0.498671358 1.01149152 0.40747406 0.91358005 0.72256 0.6742 0.08862 1.30064  
1.68435538 0.146579794 1.0593114 0.05303708 2.24184165 0.39568 1.02209 0.00044 1.95228  
1.10320739 0.571944358 0.98941022 0.35687825 1.40888297 0.49378 0.94862 0.4195 0.98801  
0.8651876 0.779922013 0.77524249 0.56845313 0.7533906 0.71717 0.79837 0.73966 0.7483  
1.37612613 0.001129017 3.4568793 0.00019132 4.75123918 0.16618 2.2679 0.17262 1.98135  
0.96281259 0.633755801 0.75309988 0.48644244 0.8899555 0.52432 0.8621 0.64429 0.73384  
0.22034772 0.171305729 1.18628374 0.26697547 1.10212736 0.59882 0.80511 0.00743 4.43428  
0.61278964 0.713908620 1.76497111 0.48968079 0.7573729 0.49131 0.88196 0.62073 0.77417  
1.39857077 0.101321502 1.31564459 0.11152 1.32092 0.11447 1.30914  
1.06305104 0.61794992 0.73319262 0.53998658 0.65572242 0.6751 0.6252 0.29845 7.93811  
0.75077428 0.30768762 1.22459884 0.26273034 1.23077097 0.44374 0.47924 0.52105 0.70071  
0.66922363 0.003431197 1.90538903 0.00760454 2.30532015 0.1078 1.46896 0.02234 2.29606  
1.14688948 0.368337564 1.1853256 0.67189203 0.38020510 0.50362 0.91927 0.32002 1.23415  
0.57849977 0.67360034 0.61889468 0.75223 0.60189 0.61055 0.68026  
0.91401618 0.324472136 1.18367159 0.47590777 0.79994058 0.56824 0.8813 0.24085 1.25868  
2.96405605 0.039058835 1.49267326 0.05687582 1.72048915 0.11744 1.33808 0.15616 1.95167  
1.4598960 0.360771313 1.06686379 0.50585804 0.79844542 0.38955 1.04213 0.20535 1.73443  
0.279016901 1.40214884 0.60555821 0.57503311 0.54966 0.73058 0.20243 1.50477  
0.428979073 1.00013256 0.39542898 0.94126245 0.71313 0.56201 0.40384 1.00013  
0.98588963 0.389544395 1.08586474 0.37437366 0.74002596 0.23184 1.20937 0.69043 0.75945  
0.85859363 0.237382269 1.36631365 0.34819897 1.02199377 0.26925 1.30996 0.23383 1.44533  
0.78479753 0.02529898 1.42313389 0.1711653 1.32422611 0.0693 1.41021 0.02984 1.5319  
1.74562635 0.458634038 1.03096124 0.46956375 0.77843958 0.34977 1.0588 0.72165 0.72745  
0.75251225 0.659678425 0.95349816 0.60375547 0.82604638 0.8078 0.41395 0.42215 0.97101  
1.37612613 0.60317464 0.86579051 0.60375547 0.82604638 0.5475 0.91185 0.50719 0.91562  
0.94012614 0.384253025 1.09374275 0.42630717 0.88893928 0.86145 0.58029 0.11368 1.43239  
0.94657604 0.46524882 1.02690644 0.80107912 0.68288053 0.21768 1.19621 0.72464 0.65335  
1.0546986 0.494015697 1.0068238 0.98897144 0.78471796 0.81675 0.69235 0.3639 1.06663  
1.04566494 0.98413574 0.45735308 0.74398722 0.68257916 0.99433 0.38753 0.50672 0.73436  
0.9061117 0.09432884 1.88498734 0.42151 0.87095793 0.60088 0.60016 0.10098 2.06902  
1.32789894 0.354849217 1.02172453 0.42151 0.87095793 0.39973 1.01191 0.48923 1.43153  
1.08341967 0.392761744 1.0194336 0.34819897 1.02199377 0.8499 0.68204 0.15415 1.59227  
0.22462817 0.22462817 0.22462817 0.22462817 0.22462817 0.22462817 0.22462817 0.22462817  
0.228347932 1.12510628 0.51087434 0.89311668 0.24038 1.14194 0.28112 1.11032  
1.04120014 0.43257448 0.08677143 0.67760945 0.80640764 0.31166 1.07187 0.64659 0.78545  
1.38762291 0.316042723 1.1120526 0.58563657 0.74413244 0.45028 0.97321 0.09478 1.52889  
0.178314942 0.30765245 0.178314942 0.30765245 0.178314942 0.30765245 0.178314942 0.30765245  
0.503283444 1.0719213 0.512977296 0.80966641 0.54473 0.77647 0.3871 1.38881  
0.229123486 2.09538853 0.44128643 2.4379604 0.61799 0.59788 0.18353 2.09539  
0.027807582 1.88933026 0.03395386 2.83534709 0.79719 0.6914 0.00078 4.33389  
0.76909653 0.643011698 0.92449178 0.91628135 0.59648306 0.95216 0.56564 0.0184 1.94468  
0.87775504 0.73686294 1.80491505 0.53995017 0.8901446 0.64631 0.83941 0.75062 0.77266  
0.778092321 0.35155414 0.80639636 0.35155414

|            |             |            |            |            |         |         |         |         |
|------------|-------------|------------|------------|------------|---------|---------|---------|---------|
| 1.1483425  | 0.221107068 | 1.04992804 | 0.34824164 | 1.03525304 | 0.32877 | 1.06442 | 0.07226 | 1.48921 |
| 1.4588393  | 0.44846952  | 1.06744401 |            |            | 0.44286 | 0.97254 | 0.08511 | 1.98576 |
| 2.83827322 | 0.094189888 | 1.25715783 | 0.14479176 | 1.22044805 | 0.94759 | 0.42494 | 2.7E-05 | 4.51724 |
| 0.90215682 | 0.397721294 | 1.05689853 | 0.6357229  | 0.82347451 | 0.25909 | 1.13484 | 0.40963 | 0.92095 |
| 1.19801111 | 0.548858024 | 0.99189973 | 0.38185315 | 0.97716744 | 0.7059  | 0.80755 | 0.12764 | 1.41019 |
|            | 0.846113079 | 0.08806075 |            |            | 0.87749 | 0.08806 |         |         |
| 1.95442013 | 0.148018042 | 1.49083441 | 0.0399623  | 4.51043154 | 0.33679 | 1.15973 | 0.14782 | 4.50236 |
| 1.3319037  | 0.431935355 | 1.07489319 | 0.6327454  | 0.73965763 | 0.72857 | 0.70767 | 0.17718 | 1.47969 |
| 1.08058884 | 0.719799996 | 0.79388527 | 0.67340804 | 0.75554905 | 0.6544  | 0.80024 | 0.60679 | 0.83151 |
|            | 0.25856239  | 1.78136512 |            |            |         |         | 0.21421 | 1.78137 |
| 0.8718603  | 0.382335464 | 1.00914648 | 0.36223134 | 1.00844342 |         |         | 0.36877 | 1.08484 |
| 0.98033571 | 0.412017111 | 1.02720007 | 0.33831949 | 1.04358349 |         |         | 0.36012 | 1.09971 |
| 1.22090768 | 0.239131258 | 1.3261199  | 0.45357846 | 0.80604592 | 0.543   | 0.89245 | 0.1629  | 1.41022 |
| 1.08302025 | 0.419111048 | 1.02266277 | 0.43087916 | 0.77740477 | 0.44968 | 0.49874 | 0.38808 | 1.02374 |
| 1.44426286 | 0.009997381 | 2.2574915  | 0.00490739 | 5.12856229 | 0.13795 | 1.59333 | 0.07329 | 2.1687  |
| 0.72062789 | 0.495251831 | 1.00569583 | 0.23812425 | 1.10539713 | 0.75433 | 0.80064 | 0.82513 | 0.70973 |
| 0.48844779 | 0.575047704 | 0.67431641 | 0.57497003 | 0.67431641 |         |         |         |         |
| 1.17657046 | 0.601958428 | 0.93072807 | 0.90179827 | 0.60979704 | 0.58535 | 0.86752 | 0.11591 | 1.7036  |
| 0.51451949 | 0.651589571 | 0.4641322  | 0.6441688  | 0.4641322  |         |         |         |         |
| 1.58883196 | 0.567311106 | 0.92587356 | 0.42955519 | 0.87112034 | 0.82495 | 0.46644 | 0.28835 | 1.44251 |
|            | 0.692335337 | 0.85561514 |            |            | 0.96695 | 0.44813 | 0.15426 | 1.52595 |
| 0.98656135 | 0.299561587 | 1.18870172 | 0.41857213 | 0.86813351 | 0.85971 | 0.65497 | 0.00951 | 2.72515 |
| 1.37577288 | 0.441192866 | 1.02228932 | 0.69184801 | 0.72915933 | 0.56223 | 0.85815 | 0.37448 | 1.03724 |
| 0.42335503 | 0.58325508  | 0.9759844  | 0.38093541 | 0.96524786 | 0.77983 | 0.50324 | 0.1584  | 1.88023 |
| 0.90634589 | 0.681239001 | 0.91680842 | 0.39071235 | 0.95120128 | 0.81896 | 0.51092 | 0.42626 | 0.90079 |
|            | 0.583707264 | 0.60481102 | 0.58484935 | 0.60407144 |         |         | 0.4929  | 0.67418 |
| 1.86515898 | 0.123910041 | 1.75927447 | 0.50805788 | 0.72289899 |         |         | 0.08256 | 1.76028 |
| 1.20918564 |             |            |            |            |         |         |         |         |
| 2.09247609 | 0.203603808 | 1.13042238 | 0.27903377 | 1.08214823 | 0.46629 | 0.96504 | 0.05326 | 1.8939  |
|            | 0.678547481 | 0.66767079 | 0.43198465 | 0.85251629 | 0.75548 | 0.35445 |         |         |
| 0.34995367 | 0.498958849 | 0.52579522 |            |            | 0.92612 | 0.40995 | 0.26081 | 2.77122 |
| 2.18276929 | 0.612058928 | 0.98506632 | 0.37362378 | 0.98366851 | 0.827   | 0.49032 | 0.34653 | 1.10675 |
|            | 0.579177962 | 0.98088741 | 0.94281695 | 0.44518192 | 0.43025 | 0.98268 | 0.08444 | 1.99262 |
| 0.68947636 | 0.40678263  | 1.06649185 | 0.58076582 | 0.73111015 | 0.30069 | 1.1258  | 0.64952 | 0.80665 |
|            | 0.252531773 | 1.38765843 | 0.27162676 | 1.29300547 |         |         | 0.2207  | 2.75982 |
|            | 0.36898055  | 1.82675944 | 0.54697747 | 0.66719823 |         |         | 0.30247 | 2.23226 |
| 1.26822437 | 0.28644884  | 1.21296509 | 0.77342616 | 0.65589248 | 0.57276 | 0.87414 | 0.07318 | 1.67919 |
|            | 0.420726294 | 1.22586855 |            |            | 0.39467 | 1.22587 |         |         |
|            | 0.55039002  | 0.49606376 |            |            |         |         | 0.45395 | 0.69606 |
| 2.16435335 | 0.576523813 | 0.61813237 |            |            |         |         | 0.4233  | 0.61813 |
|            | 0.429940978 | 1.02327285 | 0.64444042 | 0.49510996 |         |         | 0.39794 | 1.02518 |
| 1.23838456 | 0.190321206 | 1.25782719 | 0.26357461 | 1.2049083  | 0.20874 | 1.62751 | 0.29869 | 1.22101 |
| 1.23377924 | 1           | 0.0920988  | 0.9999987  | 0.05542177 | 1       | 0.13198 | 0.99999 | 0.07562 |
| 0.89718488 | 0.65126809  | 0.72302253 | 0.57331297 | 0.75786167 | 0.6199  | 0.62633 | 0.5993  | 0.75619 |
| 0.94033975 | 0.598912944 | 0.8361157  | 0.43340454 | 0.87352961 | 0.59948 | 0.61316 | 0.47016 | 0.87611 |
| 0.99006857 | 0.349735066 | 1.19160934 | 0.28533661 | 1.23362111 |         |         | 0.62298 | 0.59485 |
|            | 0.958778117 | 0.17810356 | 0.97889527 | 0.16747111 |         |         | 0.4748  | 0.76315 |
|            | 0.774047524 | 0.8325573  |            |            | 0.99153 | 0.19106 | 0.36871 | 1.10778 |
| 1.8328932  | 0.604538635 | 0.98951572 | 0.37019168 | 0.98748409 |         |         | 0.22654 | 1.5008  |
| 1.22407219 | 0.9068597   | 0.69956831 | 0.5103799  | 0.81553999 | 0.99941 | 0.35666 | 0.09319 | 1.59044 |
| 0.87188231 | 0.47342761  | 0.84500038 | 0.53674888 | 0.82000196 | 0.63763 | 0.85663 | 0.62313 | 0.82822 |
| 1.22759637 | 0.579048206 | 0.87743313 | 0.54496129 | 0.65637893 |         |         | 0.43445 | 0.89498 |
|            | 0.426798169 | 1.16681538 | 0.43793653 | 0.86615042 | 0.58941 | 0.66833 | 0.25355 | 1.87771 |
| 1.67034985 | 0.315696916 | 1.07288615 | 0.34494311 | 1.04991143 | 0.50118 | 0.90419 | 0.20058 | 1.49144 |
| 0.79309793 | 0.3473789   | 1.22527152 | 0.24501202 | 1.36049093 | 0.60481 | 0.67213 | 0.6088  | 0.64748 |
| 1.01875448 | 0.753193794 | 0.9481537  | 0.37500659 | 0.97786282 | 0.9196  | 0.35583 | 0.98633 | 0.35267 |
| 1.24826138 | 0.816567138 | 0.75489037 | 0.47397333 | 0.8174559  | 0.99476 | 0.35466 | 0.16368 | 1.44497 |
|            | 0.587699185 | 0.89792803 |            |            |         |         | 0.41021 | 0.89793 |
| 0.91699117 | 0.570637044 | 0.97863261 | 0.81091642 | 0.64614831 | 0.34974 | 1.05234 | 0.87612 | 0.59521 |
| 2.15678718 | 0.190997512 | 1.27822112 | 0.47950071 | 0.91317465 | 0.90748 | 0.64672 | 0.00203 | 2.60886 |
| 0.93947201 | 0.754534317 | 0.7426486  | 0.66818784 | 0.74248097 | 0.55353 | 0.88343 | 0.74647 | 0.70025 |
| 0.95735938 | 0.512432871 | 0.9993682  | 0.41311356 | 0.89314754 | 0.42955 | 0.96179 | 0.31935 | 1.19881 |
| 1.17702334 | 0.547070251 | 0.9668035  | 0.46528048 | 0.74881587 | 0.77531 | 0.60406 | 0.38126 | 1.11646 |
|            | 0.704232561 | 0.82772589 | 0.61391208 | 0.59119869 | 0.97888 | 0.23696 | 0.33937 | 1.16156 |
|            | 0.519913536 | 0.64576089 |            |            | 0.51029 |         | 0.64576 |         |
|            | 0.185894746 | 2.59307663 | 0.50910626 | 0.72869063 | 0.53722 | 0.61678 | 0.13232 | 2.72219 |
| 0.29688758 | 0.509488451 | 1.00099039 | 0.31848284 | 1.10731406 | 0.91309 | 0.41775 | 0.53532 | 0.82947 |
|            | 0.371465068 | 1.44397779 |            |            |         |         | 0.3383  | 1.44398 |
|            | 0.578340708 | 0.59308537 | 0.57732682 | 0.59638037 |         |         | 0.51674 | 0.43452 |
| 0.9907285  | 0.023802132 | 1.49064784 | 0.01375464 | 1.76613344 | 0.92076 | 0.63317 | 0.00122 | 2.57768 |
| 0.89972362 | 0.86929792  | 0.71309469 | 0.7447703  | 0.73304826 | 0.65094 | 0.82449 | 0.85467 | 0.64621 |
| 0.83803847 | 0.53385583  | 0.92253591 | 0.26137942 | 1.08364413 | 0.85077 | 0.70979 | 0.8253  | 0.70733 |

|            |             |            |             |            |         |         |         |         |
|------------|-------------|------------|-------------|------------|---------|---------|---------|---------|
| 0.78748546 | 0.604605487 | 1.01707779 | 0.35388884  | 1.02081559 | 0.78262 | 0.53842 | 0.44789 | 0.90537 |
| 0.76801959 | 0.17843588  | 1.30029021 | 0.15193373  | 1.4784489  | 0.79685 | 0.58142 | 0.13284 | 1.46025 |
|            | 0.265299541 | 1.71669935 | 0.60112115  | 0.57584179 |         |         | 0.18383 | 1.9563  |
| 0.75067471 | 0.300948163 | 1.26593941 | 0.42834722  | 0.87477519 | 0.7496  | 0.55891 | 0.08984 | 1.90998 |
| 0.69563485 | 0.651008471 | 0.82592069 | 0.59757617  | 0.87876164 | 0.61194 | 0.52741 | 0.52703 | 0.6564  |
| 1.20551798 | 0.351847461 | 1.1597713  | 0.30560234  | 1.50250496 |         |         | 0.37988 | 1.10818 |
| 0.52961735 | 0.260790471 | 1.25280365 | 0.51002077  | 0.81186843 | 0.73799 | 0.58033 | 0.10654 | 1.49401 |
| 1.14419007 | 0.36953404  | 1.16417272 | 0.6249298   | 0.67759382 | 0.8589  | 0.5046  | 0.07241 | 1.97277 |
|            | 0.549858195 | 0.97855317 | 0.38968985  | 0.94481298 |         |         | 0.33476 | 1.26244 |
|            |             |            |             |            |         |         |         |         |
| 0.89614393 | 0.178519242 | 1.1389343  | 0.01303168  | 2.24035285 | 0.3861  | 0.03474 | 0.15717 | 2.63498 |
|            | 0.157164925 | 2.93724883 | 0.62865043  | 0.52170012 | 0.46578 | 0.40496 | 0.06229 | 4.64022 |
| 0.89626206 | 0.194537536 | 1.38885104 | 0.69553646  | 0.61165411 | 0.64621 | 0.6942  | 0.06675 | 1.70796 |
| 0.97756807 | 0.466013513 | 1.03049301 | 0.41962558  | 0.83167451 | 0.88663 | 0.65154 | 0.06862 | 1.70266 |
|            | 0.300964188 | 1.88199868 |             |            |         |         | 0.25977 | 1.882   |
| 2.9799528  | 0.081598441 | 1.64980678 | 0.4279115   | 0.87411783 | 0.15494 | 1.52701 | 0.03642 | 2.6066  |
| 0.74564101 | 0.396866491 | 1.1068144  | 0.37210694  | 0.98431101 | 0.5847  | 0.72747 | 0.36725 | 1.10681 |
|            | 0.55553473  | 0.99472384 |             |            |         |         | 0.395   | 1.0197  |
| 0.63802542 | 0.496243075 | 1.00070074 | 0.13096675  | 1.24040522 | 0.59555 | 0.88819 | 0.96436 | 0.52758 |
| 0.95409174 | 0.391113525 | 1.12020334 | 0.57410039  | 0.79143012 | 0.62516 | 0.99841 | 0.26089 | 1.26907 |
| 0.71509201 | 0.77595924  | 0.64083088 | 0.60131726  | 0.74264813 | 0.77322 | 0.61969 | 0.63873 | 0.60686 |
| 0.94237777 | 0.214295388 | 1.37419311 | 0.18920712  | 2.14424275 | 0.57379 | 0.75159 | 0.22927 | 1.31815 |
| 1.24910026 | 0.43033365  | 1.020697   | 0.33873847  | 1.03880239 | 0.9183  | 0.61237 | 0.21963 | 1.31378 |
| 0.85880226 | 0.483245987 | 1.02627389 | 0.93632398  | 0.43900859 | 0.60308 | 0.73337 | 0.08601 | 1.75902 |
|            | 0.747931515 | 0.38218389 | 0.77340514  | 0.38218389 |         |         |         |         |
| 0.99142364 | 0.16556926  | 1.43074405 | 0.44919628  | 0.37036785 | 0.74905 | 0.71491 | 0.02266 | 2.16577 |
| 1.15264399 | 0.6401878   | 0.75648444 | 0.45727421  | 0.86470717 | 0.6818  | 0.71841 | 0.50157 | 0.88336 |
| 0.96196337 | 0.021227548 | 1.42681999 | 0.58818999  | 1.54012632 | 0.24564 | 1.16914 | 0.02797 | 1.7713  |
| 0.90137104 | 0.62150066  | 0.81210774 | 0.61719756  | 0.8073392  | 0.54134 | 0.84974 | 0.53959 | 0.77601 |
| 0.87843024 | 0.03771306  | 1.5899545  | 0.03885128  | 2.33053884 | 0.23939 | 1.25242 | 0.07038 | 1.76798 |
|            | 0.46305891  | 1.0429401  | 0.54799251  | 0.78370048 | 0.3179  | 0.55259 | 0.1797  | 1.16608 |
|            | 0.881995837 | 0.38258716 | 0.60399988  | 0.54142528 | 0.95738 | 0.23752 | 0.3228  | 2.1566  |
| 0.72493001 | 0.533214673 | 0.99116974 | 0.38390334  | 0.95022174 | 0.26239 | 1.17037 | 0.75273 | 0.70586 |
|            | 0.440965205 | 1.19167078 | 0.6341943   | 0.54810467 | 0.33512 | 1.51089 |         |         |
| 1.36518756 | 2.17625E-08 | 5.64418004 | 9.3915E-06  | 9.89721476 | 0.00072 | 3.9756  | 4.9E-05 | 6.0195  |
| 0.85658787 | 0.467296647 | 1.02173907 | 0.91817277  | 0.62540654 | 0.17315 | 1.19808 | 0.49737 | 0.93487 |
|            | 0.744778841 | 0.61754888 | 0.89872288  | 0.37763434 |         |         | 0.25072 | 2.32099 |
| 0.3423045  | 0.394559944 | 1.00069804 | 0.3647662   | 1.00069721 | 0.81955 | 0.39041 | 0.3797  | 1.08883 |
| 0.73214281 | 0.558639533 | 0.97233285 | 0.85364347  | 0.56216584 | 0.45097 | 0.93092 | 0.37018 | 1.07974 |
| 3.10241414 | 0.387938678 | 1.22801987 | 0.66778829  | 0.55133801 | 0.48623 | 0.84974 | 0.27253 | 1.45485 |
|            |             |            |             |            |         |         |         |         |
|            | 0.543051555 | 0.8132702  | 0.46256242  | 0.8132702  |         |         |         |         |
|            |             |            |             |            |         |         |         |         |
| 2.75044775 | 0.000320421 | 1.97097843 | 0.02798146  | 1.6678668  | 0.02793 | 1.64624 | 0.00012 | 4.16224 |
| 1.20473856 | 0.078697411 | 1.78186849 | 0.05906469  | 0.79295134 | 0.59462 | 0.84364 | 0.01631 | 2.34769 |
|            | 0.398567344 | 1.22126296 | 0.477939    | 0.79295158 |         |         | 0.3649  | 1.23225 |
|            | 0.8899373   | 0.01998889 | 0.82070568  | 0.51880554 | 0.56889 | 0.79665 | 0.27621 | 1.2454  |
|            | 0.346529569 | 1.0692216  | 0.34119763  | 1.05687037 |         |         | 0.1669  | 4.09799 |
|            | 0.340759932 | 1.69236167 |             |            |         |         | 0.30374 | 1.69236 |
| 0.96820478 | 1.21317E-06 | 2.71864759 | 7.6712E-05  | 3.40576323 | 0.00011 | 3.29035 | 0.01158 | 1.93878 |
|            | 0.528128791 | 0.9520894  | 0.16618746  | 1.75017174 | 0.57858 | 0.46486 | 0.40892 | 0.97411 |
| 1.11563722 | 0.500748694 | 1.0070814  | 0.64826386  | 0.75187093 | 0.8587  | 0.56044 | 0.21911 | 1.24036 |
|            | 0.843640889 | 0.2572264  | 0.8750038   | 0.2572264  |         |         |         |         |
| 0.92004304 | 0.54599042  | 0.9869828  | 0.38540753  | 0.9621086  | 0.6401  | 0.76086 | 0.11943 | 2.10082 |
| 1.06799261 | 0.357195268 | 1.0120378  | 0.35692566  | 1.01014019 | 0.7844  | 0.74779 | 0.02884 | 1.88853 |
| 0.93648652 | 0.42559671  | 1.1002003  | 0.7020535   | 0.62386151 | 0.50418 | 0.7774  | 0.29889 | 1.24988 |
| 1.40864772 | 0.415176143 | 1.0613479  | 0.53653361  | 0.87466884 | 0.89079 | 0.81604 | 0.12654 | 1.33313 |
| 1.45231474 | 0.28923926  | 1.0443742  | 0.34653896  | 1.02643121 | 0.6883  | 0.83036 | 0.04067 | 1.64569 |
| 1.35939337 | 0.07881686  | 2.66152096 | 0.17588251  | 3.50344152 |         |         | 0.11075 | 2.3543  |
|            | 0.603331912 | 1.06526607 | 0.42762602  | 0.89901648 | 0.56649 | 0.8604  | 0.32665 | 1.09416 |
| 1.14587574 | 0.811489937 | 0.73171872 | 0.78860757  | 0.63430758 | 0.65641 | 0.81267 | 0.70987 | 0.74192 |
|            |             |            |             |            |         |         |         |         |
| 0.91183339 | 0.706379023 | 0.69016192 | 0.47792597  | 0.84718193 | 0.7637  | 0.52612 | 0.44383 | 0.88287 |
| 1.2519775  | 0.201162341 | 1.40410193 | 0.143715    | 1.44121546 | 0.4818  | 0.9083  | 0.53624 | 0.82821 |
|            | 0.688448055 | 0.94403893 | 0.75552811  | 0.69863794 | 0.98193 | 0.52938 | 0.31517 | 1.04586 |
|            | 0.284366763 | 2.24374403 |             |            |         |         | 0.24176 | 2.24374 |
| 0.8720763  | 0.356916485 | 1.2835695  | 0.46392933  | 0.7802476  | 0.57889 | 0.73412 | 0.27444 | 1.42327 |
|            | 0.47816604  | 1.0357311  | 0.764586    | 0.6259564  |         |         | 0.27074 | 1.13292 |
| 0.7657847  | 0.077873294 | 1.66257139 | 0.16720872  | 3.31706649 | 0.18539 | 1.41851 | 0.09559 | 1.93311 |
| 0.86297188 | 0.654232988 | 0.9804172  | 0.37177376  | 0.89911693 | 0.43794 | 0.98727 | 0.87448 | 0.60227 |
| 1.38287066 | 0.996944091 | 0.46167321 | 0.63723673  | 0.50034132 | 0.99904 | 0.36105 | 0.89864 | 0.62621 |
| 0.75575686 | 0.329356219 | 1.02317543 | 0.11484849  | 1.43673649 | 0.40479 | 1.01029 | 0.14866 | 1.35609 |
|            |             |            |             |            |         |         |         |         |
| 0.65895451 | 0.338850432 | 1.05351939 | 0.29388473  | 1.11161788 | 0.4824  | 0.47478 | 0.38519 | 1.03414 |
| 1.09299539 | 0.52277579  | 0.99694889 | 0.56689954  | 0.7540731  | 0.92359 | 0.85568 | 0.37189 | 1.03057 |
| 0.73709131 | 0.585128118 | 0.9962747  | 0.5218901   | 0.88589802 | 0.41989 | 0.99841 | 0.80977 | 0.69887 |
|            | 0.399364858 | 1.11229203 | 0.64575798  | 0.4078925  | 0.55093 | 0.80978 | 0.31926 | 1.17186 |
|            | 0.558188251 | 0.9834202  | 0.98416771  | 0.42282564 | 0.18381 | 1.45462 | 0.3605  | 1.05853 |
| 1.36326406 | 0.579420156 | 0.66424253 | 0.58182023  | 0.63884701 | 0.48955 | 0.86309 |         |         |
|            | 0.42494958  | 1.0706181  | 0.62489871  | 0.62624005 | 1.97071 | 0.73402 | 0.08279 | 1.79616 |
|            | 0.485160159 | 1.0362722  | 0.51230945  | 0.7401643  | 0.3219  | 1.54607 | 0.43021 | 0.95902 |
| 2.02149722 | 0.061358726 | 1.77701459 | 0.0380646   | 2.37008840 | 0.19052 | 1.43206 | 0.3448  | 3.93311 |
| 1.12126284 | 0.516789801 | 0.97071897 | 0.48174721  | 0.89548818 | 0.37314 | 1.06527 | 0.78994 | 0.68808 |
| 1.65103096 | 0.676494777 | 0.80059194 | 0.67579001  | 0.7401855  | 0.56683 | 0.87487 | 0.58512 | 0.82152 |
|            | 0.394697414 | 1.01737188 | 0.24528917  | 1.31965583 | 0.55636 | 0.82634 | 0.39439 | 1.01355 |
| 0.47113887 | 0.331619704 | 1.4442142  | 0.28959734  | 1.14837403 |         |         | 0.45912 | 0.75481 |
|            |             |            |             |            |         |         |         |         |
| 0.59911708 | 0.432429933 | 1.01670559 | 0.41191894  | 0.93053552 | 0.40661 | 1.01747 | 0.20912 | 2.48558 |
| 1.7021643  | 0.46795277  | 1.06231947 | 0.46088842  | 0.8626515  | 0.56106 | 0.83959 | 0.39392 | 1.16054 |
|            | 0.267454037 | 1.44025742 | 0.48978051  | 0.77991954 | 0.72006 | 0.52038 | 0.10427 | 2.32204 |
|            | 0.648902613 | 0.85580839 | 0.624643794 | 0.65242025 | 0.91136 | 0.32397 | 0.37139 | 1.55993 |
| 1.05145065 | 0.371023295 | 1.13848304 | 0.49333648  | 0.72988519 | 0.7943  | 0.69273 | 0.085   | 1.80479 |
| 0.58834761 | 0.389580406 | 1.0090586  | 0.35734267  | 1.00911438 | 0.55416 | 0.86462 | 0.53303 | 0.83225 |
|            |             |            |             |            |         |         |         |         |
| 1.05460613 | 0.364079776 | 1.27819528 | 0.53005114  | 0.71802638 | 0.45057 | 0.90116 | 0.23536 | 1.74228 |
| 1.13318558 | 0.844153574 | 0.71797144 | 0.71085667  | 0.76360548 | 0.85005 | 0.63643 | 0.61893 | 0.82877 |
| 2.41145706 | 0.261232649 | 1.1105621  | 0.66172863  | 0.78457043 | 0.26087 | 1.13137 | 0.26207 | 1.35007 |
|            | 0.22168965  | 1.3108776  | 0.72282874  | 0.7031716  | 0.52802 | 0.91515 | 0.07161 | 1.65709 |

|            |             |            |              |             |            |         |         |  |  |         |         |
|------------|-------------|------------|--------------|-------------|------------|---------|---------|--|--|---------|---------|
|            | 0.578578264 | 0.85406897 |              |             |            |         |         |  |  | 0.42089 | 0.85407 |
|            | 0.589842189 | 0.98204132 |              |             |            |         |         |  |  | 0.4077  | 0.98204 |
|            | 0.40553247  | 1.05957056 | 0.40722364   | 0.94373679  | 3.0012     | 1.17229 |         |  |  | 0.25577 | 1.60122 |
|            | 0.468314611 | 1.03364994 | 0.40028917   | 0.92884324  |            |         |         |  |  | 0.23045 | 1.51291 |
| 1.1074607  | 0.465549086 | 1.05403961 | 0.42152599   | 0.90260096  | 0.61299    | 0.74094 |         |  |  | 0.23064 | 1.72174 |
|            |             |            |              |             |            |         |         |  |  |         |         |
| 1.75012636 | 0.60363759  | 0.99682471 | 0.36850377   | 0.99611943  | 0.32013    | 1.09568 |         |  |  | 0.04385 | 2.83555 |
|            |             |            |              |             |            |         |         |  |  |         |         |
| 0.88191068 | 0.5155239   | 0.99737413 | 0.67467116   | 0.73526145  | 0.44285    | 0.9665  |         |  |  | 0.2735  | 1.3495  |
|            | 0.41615644  | 1.93576362 |              |             |            |         |         |  |  | 0.3894  | 1.93576 |
|            |             |            |              |             |            |         |         |  |  |         |         |
|            | 0.356204528 | 1.46353006 | 0.50012954   | 0.74177627  |            |         |         |  |  | 0.32106 | 1.46353 |
|            | 0.008914294 | 2.84573851 | 0.07564334   | 2.70736216  | 0.06253    | 2.23206 |         |  |  | 0.01831 | 5.47795 |
|            | 9.26355636  | 2.90642977 | 1.00016893   | 2.88710031  | 0.00736    | 2.26481 |         |  |  | 0.23045 | 3.9191  |
| 2.37165014 | 0.506188301 | 1.00861374 | 0.37565016   | 0.70645088  | 0.30749    | 1.69579 |         |  |  | 0.43853 | 0.86517 |
|            | 0.11375575  | 1.48795415 | 0.41054654   | 0.90002994  | 0.2449     | 1.26669 |         |  |  | 0.05417 | 2.18507 |
| 1.550826   | 0.08091958  | 1.74334874 | 0.00910824   | 0.51078947  |            |         |         |  |  | 0.2746  | 1.25594 |
|            | 0.604394279 | 0.94803504 | 0.39069051   | 0.94803504  |            |         |         |  |  |         |         |
|            | 0.58747637  | 0.72053723 |              |             |            |         |         |  |  | 0.41048 | 0.72054 |
|            | 0.559677086 | 0.99199403 | 0.1862801    | 1.56044495  | 0.54555    | 0.76812 |         |  |  | 0.40426 | 0.9864  |
| 0.27907294 | 0.38735768  | 1.02655991 | 0.35631663   | 1.02653286  |            |         |         |  |  | 0.51054 | 0.9564  |
| 0.93768101 | 0.015441468 | 1.52263716 | 0.01431805   | 1.92988777  | 0.29331    | 1.13723 |         |  |  | 0.01748 | 2.08994 |
|            |             |            |              |             |            |         |         |  |  |         |         |
| 0.64201242 | 0.518192778 | 0.99107118 | 0.62808862   | 0.68735833  | 0.62215    | 0.69457 |         |  |  | 0.34568 | 1.24579 |
| 0.74759506 | 0.492668221 | 1.00737647 | 0.3949482    | 0.96109488  | 0.45551    | 0.80941 |         |  |  | 0.15023 | 1.47984 |
| 0.81936886 | 0.44215795  | 1.05649439 | 0.6057141    | 0.7263823   | 0.38468    | 1.02973 |         |  |  | 0.39688 | 1.0761  |
| 0.68301437 | 0.860846689 | 0.68125052 | 0.57097001   | 0.81835816  | 0.70975    | 0.75718 |         |  |  | 0.88299 | 0.58395 |
| 0.50267023 | 0.058318278 | 3.5783102  | 0.02812245   | 3.72254202  |            |         |         |  |  | 0.54766 | 0.57    |
|            | 0.653995909 | 0.96384768 | 0.98393335   | 0.12299336  |            |         |         |  |  | 0.40797 | 0.97901 |
|            | 0.590664062 | 0.98677798 | 0.5165935    | 0.71286498  |            |         |         |  |  | 0.46885 | 0.98679 |
|            | 0.58675797  | 0.94877432 |              |             |            |         |         |  |  | 0.41131 | 0.94877 |
| 1.22774677 | 0.271316395 | 1.18908301 | 0.43695441   | 0.93715358  | 0.65183    | 0.78752 |         |  |  | 0.08906 | 1.53345 |
|            | 0.403038355 | 1.22191389 | 0.48564508   | 0.80340049  | 0.45551    | 0.80941 |         |  |  | 0.25016 | 2.9251  |
|            | 0.859292962 | 0.35785193 | 0.46887777   | 1.01819251  | 0.38468    | 1.02973 |         |  |  | 0.27989 | 0.83737 |
| 1.46343356 | 0.00018046  | 1.98634847 | 0.00044268   | 2.5862628   | 0.101      | 1.39191 |         |  |  | 0.00208 | 2.40417 |
|            | 0.37145648  | 1.2146417  | 0.31205945   | 1.10938073  | 0.36761    | 0.81973 |         |  |  | 0.36761 | 2.24688 |
|            | 2.26494656  | 0.41392591 | 1.04506304   | 0.41278065  | 0.95748436 | 0.83544 | 0.67016 |  |  | 0.05172 | 1.63797 |
| 0.37564819 | 0.596516319 | 0.89261355 | 0.58113268   | 0.60647604  | 0.43797    | 0.92347 |         |  |  | 0.42905 | 0.83409 |
| 0.85620722 | 0.468705253 | 1.0379561  | 0.64822849   | 0.74399965  | 0.68561    | 0.69204 |         |  |  | 0.24148 | 1.31821 |
| 0.8214831  | 0.26933893  | 1.17736637 | 0.16948945   | 1.58831004  | 0.4414     | 0.95508 |         |  |  | 0.22348 | 1.3409  |
|            |             |            |              |             |            |         |         |  |  |         |         |
| 0.90062458 | 0.31990793  | 1.20590948 | 0.51538246   | 0.80459062  | 0.76928    | 0.59237 |         |  |  | 0.1513  | 1.45259 |
| 0.93632904 | 0.585320639 | 0.91450293 |              |             | 0.48865    | 0.82639 |         |  |  | 0.43874 | 0.91518 |
|            |             |            |              |             |            |         |         |  |  |         |         |
| 0.80245411 | 0.879348093 | 0.55322556 | 0.85641187   | 0.54120918  | 0.79356    | 0.56802 |         |  |  | 0.51146 | 0.8384  |
| 0.88380782 | 0.781878253 | 0.68875017 | 0.77982438   | 0.69924414  | 0.64818    | 0.56444 |         |  |  | 0.60231 | 0.7733  |
| 1.04069216 | 0.4219164   | 1.51818721 | 0.48277763   | 0.81768855  | 0.63704    | 0.74716 |         |  |  | 0.09201 | 2.25442 |
| 0.78852174 | 0.348441273 | 1.14508713 | 0.41955247   | 0.91066201  | 0.59591    | 0.69772 |         |  |  | 0.19887 | 1.3504  |
| 0.51961712 | 0.438832544 | 0.88840364 | 0.45995988   | 0.90485981  | 0.69827    | 0.70048 |         |  |  | 0.28276 | 1.2018  |
| 0.78898322 | 0.526997665 | 0.99876073 | 0.3752649    | 0.98736258  | 0.4118     | 1.00787 |         |  |  | 0.46895 | 0.91153 |
|            |             |            |              |             |            |         |         |  |  |         |         |
|            | 0.393341752 | 1.32725122 | 0.46921868   | 0.77053475  |            |         |         |  |  | 0.35217 | 1.372   |
|            | 0.400947523 | 1.00908437 | 0.34299699   | 1.05487862  |            |         |         |  |  | 0.40223 | 1.00703 |
|            | 0.403994185 | 1.05844976 | 0.77984572   | 0.64690786  | 0.21561    | 1.49329 |         |  |  | 0.37285 | 1.06806 |
|            |             |            |              |             |            |         |         |  |  |         |         |
| 1.23717306 | 0.034031797 | 1.81856145 | 0.02284199   | 2.28837131  | 0.28462    | 1.5766  |         |  |  | 0.16952 | 1.4961  |
| 1.01145739 | 0.284089718 | 1.2863491  | 0.49382574   | 0.84155291  | 0.63992    | 0.78159 |         |  |  | 0.14851 | 1.59122 |
|            |             |            |              |             |            |         |         |  |  |         |         |
|            | 0.627166557 | 0.5107174  | 0.63585105   | 0.5107174   |            |         |         |  |  | 0.40059 | 0.90943 |
|            | 0.615325442 | 0.88821275 | 0.63888146   | 0.54725019  |            |         |         |  |  | 0.83807 | 0.57422 |
| 0.67478182 | 0.71188666  | 0.72771708 | 0.45894729   | 0.86807815  | 0.57046    | 0.89575 |         |  |  | 0.27903 | 1.27308 |
| 0.77337952 | 0.4321295   | 1.08275107 | 0.39772237   | 0.80911292  | 0.64877    | 0.70673 |         |  |  |         |         |
|            |             |            |              |             |            |         |         |  |  |         |         |
| 2.07865063 | 4.42195E-07 | 3.6169225  | 2.1925E-06   | 6.32644054  | 0.02648    | 2.00089 |         |  |  | 0.00011 | 4.33324 |
|            | 0.447935414 | 1.04179517 | 0.74181067   | 0.65713816  | 0.56507    | 0.81546 |         |  |  | 0.31856 | 1.18991 |
|            | 0.96965407  | 0.00018268 | 0.2008411    | 0.2008411   | 0.40249    | 1.38094 |         |  |  | 0.12024 | 1.1888  |
| 0.42848929 | 0.29786932  | 1.22664844 | 0.25252497   | 1.28516197  | 0.46038    | 0.90224 |         |  |  | 0.55829 | 0.75728 |
| 0.94645488 | 0.461975263 | 1.03783672 | 0.5271881    | 0.88386868  | 0.221409   | 1.29466 |         |  |  | 0.88335 | 0.64588 |
| 0.88821679 | 0.416877347 | 1.11979778 | 0.69004874   | 0.59277843  | 0.56199    | 0.59835 |         |  |  | 0.29647 | 1.2678  |
|            | 0.571976085 | 0.60717664 | 0.57197677   | 0.60529917  |            |         |         |  |  | 0.24676 | 0.6246  |
| 1.00974726 | 0.407745241 | 1.08345301 | 0.34516522   | 1.1264246   | 0.64107    | 0.8023  |         |  |  | 0.28869 | 0.92033 |
| 0.62797312 | 0.37520534  | 1.02295651 | 0.0217037    | 4.52336078  | 0.64194    | 0.42877 |         |  |  | 0.39597 | 1.01492 |
|            | 0.415091105 | 1.19477387 | 0.57963608   | 0.71231967  | 0.37439    | 1.21449 |         |  |  | 0.37439 | 1.21449 |
| 1.14361685 | 0.155896415 | 1.17784484 | 0.24590135   | 1.10367628  | 0.5995     | 0.86575 |         |  |  | 0.05589 | 1.57818 |
| 0.69709222 | 0.589922313 | 0.82038434 | 0.57761417   | 0.80321603  | 0.54826    | 0.83663 |         |  |  | 0.47978 | 0.87014 |
| 0.64977379 | 0.925293224 | 0.61594751 | 0.60940656   | 0.8415696   | 0.68947    | 0.71396 |         |  |  | 0.95587 | 0.52362 |
|            |             |            |              |             |            |         |         |  |  |         |         |
| 0.8344478  | 0.625787451 | 0.99967936 | 0.36526912   | 0.99967936  | 0.54509    | 0.53997 |         |  |  | 0.25374 | 1.36959 |
| 0.58252652 | 0.37820378  | 1.01803187 | 0.36296651   | 1.0214681   | 0.43587    | 0.98041 |         |  |  | 0.29166 | 1.03739 |
| 0.98171352 | 0.484502332 | 1.01417045 | 0.65884512   | 0.70365618  | 0.4319     | 0.96368 |         |  |  | 0.2742  | 1.23486 |
| 0.90689797 | 0.348247659 | 1.09183429 | 0.66276588   | 0.717379203 | 0.56759    | 0.86271 |         |  |  | 0.27592 | 1.11888 |
| 1.0368763  | 0.432892654 | 1.04609866 | 0.65178345   | 0.70285515  | 0.59518    | 0.78903 |         |  |  | 0.25001 | 1.08142 |
| 0.9410261  | 0.02039708  | 2.2066951  | 0.01707292   | 2.61231081  | 0.15497    | 1.78009 |         |  |  | 0.02093 | 1.98405 |
| 0.87502854 | 0.727825471 | 0.74368636 | 0.681905     | 0.77338466  | 0.51024    | 0.93582 |         |  |  | 0.69778 | 0.66449 |
| 0.79184311 | 0.518225539 | 0.99822903 | 0.39640607   | 0.97563355  | 0.13033    | 1.29912 |         |  |  | 0.82114 | 0.69039 |
|            | 0.80386418  | 0.67562756 | 0.68885795   | 0.67562756  |            |         |         |  |  |         |         |
|            | 0.019994916 | 1.75090249 | 0.0834743    | 1.60007811  | 0.27503    | 1.5386  |         |  |  | 0.02399 | 1.97918 |
|            | 0.651461567 | 0.88394821 | 0.3741176    | 0.65674809  | 0.90836    | 0.41784 |         |  |  | 0.39149 | 1.09888 |
|            |             |            |              |             |            |         |         |  |  |         |         |
| 0.52524528 | 0.399596733 | 1.06506192 | 0.46230466   | 0.92913883  | 0.26152    | 1.14333 |         |  |  | 0.74894 | 0.68434 |
|            |             |            |              |             |            |         |         |  |  |         |         |
| 1.00983176 | 0.29902652  | 1.05233395 | 0.34526417   | 1.03298764  | 0.66131    | 0.67644 |         |  |  | 0.12291 | 1.41806 |
|            | 0.511350044 | 0.99994985 | 0.70912539   | 0.54215687  | 0.39861    | 1.02972 |         |  |  | 0.41774 | 0.97552 |
|            | 0.43566884  | 1.14882021 | 0.66029302   | 0.49573152  |            |         |         |  |  | 0.42881 | 1.30819 |
| 0.7422282  | 0.358729604 | 1.05647959 | 0.15793999   | 1.18850265  | 0.19539    | 1.18043 |         |  |  | 0.989   | 0.44516 |
| 0.48670732 | 0.440293677 | 1.01586477 | 0.4234262    | 0.94057641  | 0.61222    | 0.75787 |         |  |  | 0.38749 | 0.22521 |
|            | 0.33907194  | 1.24500168 | 0.41200121   | 0.89897254  |            |         |         |  |  | 0.08943 | 2.49713 |
| 0.89067487 | 0.330682442 | 1.17651168 | 0.42329477   | 0.8035366   | 0.82861    | 1.42344 |         |  |  | 0.27723 | 1.27129 |
| 0.7180338  | 0.34094071  | 1.16429318 | 0.51374488   | 0.82199161  | 0.46291    | 0.8992  |         |  |  | 0.28806 | 1.18754 |
| 0.75746165 | 0.406266544 | 1.0826523  | 0.43875651   | 0.86967001  |            |         |         |  |  | 0.35596 | 1.10341 |
| 0.87631070 | 0.24834645  | 2.50982829 | 0.00818557   | 3.02732196  | 0.0022     | 2.77028 |         |  |  | 0.02963 | 8.25233 |
| 0.86829585 | 0.017693612 | 1.6303361  | 0.02455426   | 2.02727883  | 0.15915    | 1.34684 |         |  |  | 0.06984 | 1.73799 |
|            |             |            |              |             |            |         |         |  |  |         |         |
| 1.18638183 | 0.812268825 | 0.73573347 | 0.84889038</ |             |            |         |         |  |  |         |         |

|            |             |             |            |            |         |         |         |         |
|------------|-------------|-------------|------------|------------|---------|---------|---------|---------|
| 1.04717331 | 0.40443622  | 1.08636125  | 0.56172909 | 0.80177134 | 0.25311 | 1.2098  | 0.76697 | 0.589   |
| 0.81217166 | 0.37444649  | 1.50392978  | 0.33026879 | 2.47855605 | 0.48417 | 0.86677 | 0.40193 | 1.34953 |
| 0.93187952 | 0.13774434  | 1.43531339  | 0.58144368 | 0.78707317 | 0.69417 | 0.75588 | 0.02773 | 1.87033 |
|            | 0.401337259 | 1.28095098  |            |            | 0.40491 | 1.07926 | 0.37237 | 1.28095 |
|            | 0.599892857 | 0.97137089  |            |            |         |         | 0.47846 | 0.95127 |
| 1.00042254 | 0.436250422 | 1.06950568  | 0.59288162 | 0.67577841 |         |         | 0.39441 | 1.08585 |
|            | 0.270224003 | 1.21444433  | 0.43464043 | 0.90262295 | 0.44905 | 0.88122 | 0.12313 | 1.48931 |
| 1.25383017 | 0.612365996 | 0.73130928  | 0.38410733 | 0.65243298 | 0.22308 | 1.35531 | 0.44819 | 0.82428 |
|            | 0.112381864 | 1.27169171  | 0.17352102 | 1.23380031 |         |         | 0.20115 | 1.29725 |
| 0.78013994 | 0.68004894  | 0.72103041  | 0.60782464 | 0.71098642 | 0.72601 | 0.62149 | 0.36891 | 1.96568 |
|            | 0.625523023 | 0.81768133  | 0.40214912 | 0.82942748 |         |         | 0.40591 | 0.79987 |
| 1.02200913 | 0.585383031 | 0.92957577  | 0.70818474 | 0.68098416 | 0.70102 | 0.7308  | 0.71572 | 1.26185 |
| 0.95801578 | 0.334779394 | 1.18252208  | 0.55701095 | 0.75304075 | 0.68724 | 0.7394  | 0.17106 | 1.42364 |
| 1.02945956 | 0.268626487 | 1.07884428  | 0.34093119 | 1.04564855 | 0.28007 | 1.35372 | 0.21972 | 1.24087 |
|            | 0.53809229  | 0.53731087  |            |            |         |         | 0.47073 | 0.53731 |
| 0.90335034 | 0.001358389 | 1.80691897  | 0.00455246 | 1.96136545 | 0.07725 | 1.62409 | 0.02339 | 1.76205 |
| 0.72062625 | 0.608732982 | 0.95407986  | 0.43123235 | 0.93357875 | 0.61884 | 0.82769 | 0.45641 | 0.97052 |
| 0.81915569 | 0.457682528 | 1.02842577  | 0.54818479 | 0.8232799  | 0.3306  | 1.0854  | 0.80969 | 0.57425 |
| 1.13360452 | 0.181884623 | 1.35619008  | 0.20310272 | 1.29150577 | 0.52588 | 0.82535 | 0.20062 | 1.73745 |
| 0.95434169 | 0.31453576  | 1.15724245  | 0.63502888 | 0.8066707  | 0.71499 | 0.75589 | 0.09525 | 1.50936 |
| 0.68120164 | 0.343343173 | 1.1338754   | 0.64423934 | 0.70227084 | 0.43695 | 0.94552 | 0.14006 | 1.50147 |
| 0.92184486 | 0.149222095 | 1.23112233  | 0.00382025 | 3.1297108  | 0.36039 | 1.06888 | 0.62747 | 0.72654 |
|            | 0.154448686 | 1.37860273  | 0.19941602 | 1.3009082  | 0.15372 | 1.64991 | 0.54378 | 0.82196 |
| 1.18655324 | 3.4085E-05  | 2.76368797  | 0.00010156 | 4.42078243 | 0.01487 | 2.02586 | 0.00775 | 2.76796 |
| 0.99993005 | 0.392867501 | 1.00139964  | 0.3641598  | 1.00138391 | 0.64057 | 0.68814 | 0.2671  | 1.33238 |
| 1.12712687 | 0.816277996 | 0.73465634  | 0.69581568 | 0.71535694 | 0.55458 | 0.87891 | 0.82101 | 0.68321 |
| 1.2281915  | 0.351510406 | 1.04641474  | 0.32182899 | 1.0510623  | 0.90203 | 0.466   | 0.12681 | 1.31745 |
| 0.82219424 | 0.47322702  | 1.10048152  | 0.59662186 | 0.7253648  | 0.49633 | 0.91406 | 0.35842 | 1.51416 |
| 0.83567106 | 0.33387075  | 1.20788311  | 0.58155366 | 0.7588355  | 0.32948 | 1.25334 | 0.12583 | 1.24423 |
|            | 0.056401138 | 1.46882921  | 0.00010464 | 3.08683595 | 0.96443 | 0.4341  | 0.36618 | 1.12295 |
| 0.79671714 | 0.096472001 | 1.31717174  | 0.2566378  | 1.14926804 | 0.04939 | 2.03215 | 0.18999 | 1.55231 |
|            | 0.689117076 | 0.69744022  | 0.61482303 | 0.69744022 |         |         |         |         |
| 0.70341884 | 0.575202377 | 0.98951236  | 0.32769799 | 1.02651394 | 0.965   | 0.95983 | 0.94409 | 0.57168 |
| 0.61530574 | 0.240991007 | 1.28629329  | 0.16703231 | 1.35517251 | 0.51423 | 0.76455 | 0.45066 | 0.90252 |
| 1.02342155 | 0.385227639 | 1.03409776  |            |            | 0.59665 | 0.74716 | 0.38471 | 1.03779 |
| 0.86017431 | 0.075196349 | 1.42708241  | 0.04258571 | 2.54542663 | 0.32893 | 1.339   | 0.19535 | 1.39582 |
| 1.21711111 | 0.252079424 | 1.15338145  | 0.31646025 | 1.0943153  | 0.50216 | 0.90318 | 0.15718 | 1.62064 |
| 1.54916638 | 0.134469373 | 1.20833493  | 0.15022329 | 1.34266358 | 0.13999 | 1.48028 | 0.30846 | 1.09676 |
| 1.08818331 | 0.576594443 | 0.98109214  | 0.609546   | 0.6906307  | 0.38985 | 1.15449 | 0.40838 | 0.97693 |
|            | 0.194496434 | 1.32215015  | 0.47498605 | 0.85916837 | 0.19328 | 1.35029 | 0.27251 | 1.2953  |
| 1.23487895 | 0.077451954 | 1.29619688  | 0.27779925 | 1.12758503 | 0.20682 | 1.29466 | 0.02838 | 1.90007 |
| 0.33206443 | 0.348016887 | 1.47705703  | 0.50188647 | 0.74180801 |         |         | 0.31183 | 4.7722  |
| 0.28402731 | 0.59789934  | 0.96649607  | 0.62922282 | 0.68238756 | 0.55029 | 0.5043  | 0.4139  | 0.97136 |
|            | 0.37663469  | 1.22864881  | 0.54578704 | 0.72102497 | 0.46335 | 0.89928 | 0.29889 | 1.36175 |
| 2.15358045 | 0.609353895 | 0.93851174  | 0.58664948 | 0.82897683 | 0.97066 | 0.56214 | 0.04534 | 1.75057 |
| 1.18504256 | 0.3701577   | 1.0091209   | 0.09750834 | 1.35477291 | 0.4127  | 1.00479 | 0.04157 | 2.19141 |
| 1.09423519 | 0.216496866 | 2.484945246 | 0.51459182 | 0.72040788 | 0.52044 | 0.86009 | 0.15098 | 2.8071  |
|            | 0.64528491  | 0.38703556  | 0.65455976 | 0.38703556 |         |         |         |         |
| 0.95386409 | 0.215670447 | 1.63459873  | 0.59540532 | 0.65490256 | 0.54216 | 0.78066 | 0.12972 | 1.86599 |
|            | 0.458697715 | 1.31861822  | 0.58522274 | 0.61768825 |         |         | 0.29259 | 1.51297 |
|            | 0.648987929 | 1.02598232  | 0.46150729 | 0.51984232 |         |         |         |         |
|            | 0.293965046 | 1.06272238  | 0.35455511 | 1.03530741 | 0.23184 | 1.54744 | 0.07117 | 2.97467 |
| 0.78644905 | 0.52725949  | 0.98620835  | 0.61392513 | 0.78100363 | 0.68069 | 0.79918 | 0.31617 | 1.2179  |
| 1.18610019 | 0.393921267 | 1.27611521  | 0.45137572 | 0.81327202 | 0.63608 | 0.59564 | 0.23522 | 1.91308 |
|            | 0.60154992  | 0.68857635  | 0.41541703 | 0.63026617 | 0.4235  | 0.73282 | 0.49017 | 0.72716 |
| 0.9251898  | 0.191485482 | 1.23132608  | 0.84146889 | 0.69704407 | 0.02706 | 1.57737 | 0.51319 | 0.92279 |
|            | 0.338117584 | 1.13594085  | 0.39809142 | 0.92098285 | 0.29989 | 1.27764 | 0.11675 | 2.17594 |
| 2.41488454 | 1.39592E-06 | 3.79078419  | 1.6671E-05 | 6.75317885 | 0.00194 | 2.52709 | 0.00163 | 5.86587 |
| 0.23938419 | 0.20138112  | 1.44815252  | 0.35317544 | 1.22772498 | 0.47034 | 0.91943 | 0.11974 | 1.90503 |
|            | 0.365486198 | 1.94711585  | 0.49232298 | 0.7681773  | 0.32979 | 0.96967 | 0.29279 | 1.96967 |
|            | 0.173220317 | 1.1753187   | 0.14861182 | 1.24794526 | 0.47784 | 0.95977 | 0.26849 | 1.1351  |
|            | 0.390871119 | 1.00301375  | 0.36302336 | 1.00295873 | 0.73415 | 0.66571 | 0.17504 | 1.62248 |
|            | 0.297880315 | 1.24165799  | 0.23942749 | 1.26777465 | 0.57404 | 0.62128 | 0.57129 | 0.56542 |
|            | 0.013536352 | 3.03650285  | 0.00462782 | 3.21151883 |         |         | 0.30743 | 1.91193 |
|            | 0.092222557 | 4.03278505  | 0.05453175 | 4.03278505 |         |         | 0.20503 | 1.42992 |
| 1.1404545  | 0.563280823 | 0.95388082  |            |            | 0.84026 | 0.66498 | 0.35692 | 1.36701 |
| 0.47948535 | 0.489917006 | 1.0383046   |            |            | 0.61286 | 0.77881 | 0.35692 | 1.36701 |
| 0.62736162 | 0.389705579 | 1.23025264  |            |            | 0.22465 | 1.31919 | 0.43352 | 0.87291 |
| 25.2777133 | 0.195963791 | 1.16857507  | 0.22739503 | 1.24397897 | 0.36724 | 1.06851 | 0.15079 | 1.50863 |
| 0.90252994 | 0.284172329 | 1.35168976  | 0.23979599 | 1.35503898 | 0.46692 | 0.9383  | 0.54167 | 1.38803 |
| 0.1853813  | 0.40252304  | 1.08724222  | 0.63116016 | 0.78199332 | 0.85091 | 0.54575 | 0.12556 | 1.45559 |
| 1.54725992 | 0.600951854 | 0.7557804   | 0.5856856  | 0.70883741 |         |         | 0.43433 | 0.79402 |
| 0.74762246 | 0.766654989 | 0.66705439  | 0.54631328 | 0.85183041 | 0.49505 | 0.94503 | 0.79902 | 0.64013 |
| 0.85757387 | 0.107667128 | 1.59355904  | 0.09942367 | 1.86660279 | 0.21158 | 1.71727 | 0.32061 | 1.27342 |
| 0.57713339 | 0.014201553 | 1.6772446   | 0.01454809 | 2.10740145 | 0.07054 | 1.70769 | 0.19112 | 1.33564 |
| 1.23555605 | 0.502773609 | 1.03813743  |            |            | 0.3865  | 1.03916 | 0.45829 | 0.7981  |
|            | 0.294795836 | 2.41623621  |            |            |         |         | 0.25306 | 2.41624 |
| 0.9018976  | 0.371978378 | 1.20911163  | 0.43155037 | 0.82567897 | 0.45174 | 0.87519 | 0.25403 | 1.65194 |
|            | 0.821346337 | 0.72622415  | 0.85227262 | 0.72622415 |         |         |         |         |
| 1.9277469  | 7.79396E-06 | 3.08815052  | 0.00029589 | 3.74530992 | 0.03993 | 1.74626 | 4E-06   | 10.5844 |
| 0.82403032 | 0.610181881 | 0.97253232  | 0.39598597 | 0.67506608 | 0.46692 | 0.9383  | 0.58559 | 0.83816 |
|            | 0.109016544 | 2.8581764   | 0.06993533 | 2.8581764  |         |         |         |         |
| 0.93604387 | 0.241390686 | 1.56006991  |            |            | 0.52442 | 0.55    | 0.27001 | 1.56936 |
| 0.90908036 | 0.518156272 | 0.99279268  |            |            | 0.42766 | 0.96368 | 0.3654  | 1.18613 |
| 0.65200222 | 0.709618801 | 0.60280633  |            |            | 0.45403 | 0.86781 | 0.76305 | 0.43421 |
| 1.79522236 | 0.630241713 | 0.87208049  |            |            | 0.19528 | 1.2983  | 0.96288 | 0.2902  |
|            | 0.186277192 | 2.86258579  |            |            | 0.04551 | 2.5946  | 0.11735 | 5.15498 |
| 1.57467585 | 0.522107363 | 0.99240836  | 0.85052351 | 0.58597952 | 0.59063 | 0.86471 | 0.26483 | 1.19692 |
|            | 0.64540981  | 0.78551355  | 0.6307035  | 0.53361484 |         |         | 0.27466 | 2.11785 |
| 0.64437289 | 0.376331105 | 1.00997019  | 0.35886402 | 1.00904668 | 0.37355 | 1.06439 | 0.39075 | 2.70612 |
| 1.18961897 | 0.315866708 | 1.0954184   |            |            | 0.49533 | 0.87022 | 0.33705 | 1.09597 |
| 0.42796829 | 0.239034297 | 1.70381655  |            |            | 0.62039 | 0.79422 | 0.19376 | 1.70382 |
| 0.86540415 | 0.716136274 | 0.78090517  |            |            | 0.66258 | 0.65529 | 0.67965 | 0.77389 |
|            | 0.475485224 | 1.07133471  |            |            | 0.3     | 1.62848 |         |         |

0.76716203 0.427790366 1.26599327 0.40283 1.26599
0.81087815 0.115227423 1.33103432 0.02590407 1.55819492 0.51854 0.9382 0.70398 0.7963
0.83914621 0.316108695 1.86793975 0.56466321 0.71821524 0.54157 0.56071 0.20146 2.87304
1.05816488 0.525640427 0.98484938 0.43390471 0.90015756 0.46342 0.9434 0.3628 1.40132
0.93668312 0.35249896 1.0350068 0.34529569 1.0293427 0.15621 1.26323 0.43448 0.97522
0.89154974 0.364878578 1.2604149 0.14331 1.32269 0.5966 0.82724
0.89674776 0.3615656 1.10932143 0.67189 0.48565 0.33742 1.1473
0.396448493 1.16986796 0.36251 1.10628 0.24744 1.56029
0.41972784 0.457820791 1.0279652 0.43177448 0.92016048 0.57068 0.74981 0.39824 1.05022
0.97252615 0.473753804 1.02949358 0.43951217 0.93057511 0.46342 0.96343 0.28146 1.46511
1.18776719 0.611354993 0.92595267 0.97354272 0.41914531 0.28235 1.24085 0.17916 1.71037
0.67814609 0.80641552 0.74845892 0.79696806 0.68972407 0.49352 0.77545 0.6302 0.81864
1.03414317 0.416888749 1.02487597 0.32905531 1.0407646 0.74663 0.70946 0.62031 0.81419
1.02749098 0.021517322 0.538040892 0.00765155 5.47797611 0.55331 0.85649 0.60733 0.04398
0.345767082 1.0901758 0.345767082 1.0901758 0.35599 1.09046
0.95282153 0.569131919 0.61509412 0.77369 0.6124 0.46817 0.72593
1.10510988 0.474145 1.15903363 0.42666 0.81963 0.25753 3.48864
0.77431225 0.262858799 1.20412065 0.43893395 0.83560888 0.28866 1.19311 0.26716 1.26964
1.48439794 0.369982179 1.09383067 0.46766427 0.91928654 0.81957 0.71666 0.10824 1.39717
0.71150464 0.484584782 1.01208582 0.46354745 0.95748374 0.52785 0.89102 0.24079 1.24051
0.81084901 0.345540671 1.01122642 0.00055883 2.50575992 0.40976 1.00514 0.26158 2.13403
1.24399838 0.000399929 2.1315623 0.00218938 2.78019446 0.02088 1.78988 0.01259 2.15553
0.77033961 0.707472957 0.92689886 0.61056126 0.82886316 0.44551 0.98168 0.90446 0.60677
0.033057267 6.62368221 0.01439595 6.62368221 0.45615 0.74988 0.25849 1.55994
0.251115502 1.48795951 0.45615 0.74988 0.25849 1.55994
0.78449842 0.38954224 1.09139561 0.87732035 0.59679196 0.11376 1.42121 0.52778 0.8667
0.55964701 0.450010064 1.06421407 0.59307156 0.85039234 0.17462 1.54412 0.8186 0.48798
1.63550684 0.060748777 1.32771058 0.86747269 0.67333369 0.05305 1.42361 0.01737 1.77251
0.89182328 0.192777631 1.14894891 0.09661036 1.31505187 0.20012 1.176 0.88987 0.5954
0.78317036 0.325974857 1.15628256 0.03498 1.54543 0.9254 0.58998
1.01094933 0.610602027 0.98532989 0.46136 0.96665 0.42129 0.9861
1.50755035 0.000888382 2.09662649 3.8E-05 3.41335 0.1017 4.2203
0.79933553 0.57888815 0.98533787 0.23106 1.15317 0.8564 0.57887
1.1104194 0.51626819 0.99461415 0.42321 0.99176 0.21556 1.49038
1.12972447 0.47292626 1.0136099 0.82483 0.71227 0.30017 1.08791
1.11093363 0.45736322 1.0041761 0.07796832 1.38182452 0.42359 0.94489 0.00501 2.56836
1.41625964 0.043786276 0.63176648 0.0275116 1.5767826 0.12011 1.88288 0.19485 1.56993
0.71952768 0.61128763 0.99543388 0.37157437 0.94946715 0.25251 1.12698 0.77648 0.73885
0.72674393 0.019634687 1.36434483 0.10396683 1.28490347 0.10663 1.29549 0.02978 1.6497
0.65454922 0.335026103 1.06709847 0.24366646 1.14670232 0.36824 1.05603 0.75391 0.68402
1.44150673 0.00569611 1.79884655 0.01052 2.03837 0.0395 1.62643
0.80254178 0.60078095 0.69930454 0.58545 0.6683 0.5433 0.77161
0.6829762 0.4960715 1.10488094 0.34794 1.10976 0.56573 0.59153
0.78762192 0.16268891 2.83584968 0.11795 2.83585
0.89150941 0.324034233 1.1429296 0.44062884 0.92099453 0.25773 1.18638 0.34697 2.10235
0.57364943 0.053864978 1.29995705 0.17963353 1.51515628 0.31078 1.08307 0.00267 2.38066
0.96194281 0.00953464 1.7458881 0.0094052 2.0958828 0.03886 2.89681 0.11235 2.6516
1.5257372 0.067112513 2.55666577 0.09446365 2.48804801 0.19192 2.67369 0.37918 1.32234
0.14660129 1.80953563 0.16023191 1.86254424 0.12366076 1.89014237 0.08248633 1.89014237
0.83517951 0.370948663 1.0610839 0.61198 0.80881 0.34687 1.08206
1.43041774 0.126890103 3.55303649 0.08095854 1.973474 0.48824 0.8431 0.15267 3.82412
0.81184271 0.006153314 2.57025279 0.04978 2.57432 0.01782 4.72483
2.01949316 0.605471803 0.97935668 0.37723058 0.97697075 0.44728 0.89117 0.33824 1.51585
0.168934027 1.58728174 0.30926349 1.635192 0.12832 2.80899 0.32587 1.27177
2.08974934 0.727812555 0.84654597 0.75616645 0.66873669 0.92025 0.58831 0.19804 1.39346
0.74108448 0.583855299 0.9459705 0.43594208 0.84652007 0.51852 0.80689 0.42915 0.9535
1.3357578 1.7057E-10 4.59247061 6.8023E-06 5.29382607 5.3E-06 4.01249 2.2E-05 4.86929
0.9517794 0.22931858 1.32452408 0.09444756 1.6057915 0.68075 0.74369 0.51415 0.87496
1.27233607 0.290567443 2.08960011 0.69285 0.66114 0.24847 2.0896
0.89397953 0.434197571 1.07253386 0.155029788 0.9690941 0.37308 1.05229 0.31001 1.24157
0.75728254 0.507800117 1.00222741 0.99390005 0.34000168 0.15003 1.63762 0.0371 2.46435
1.59431028 0.414938073 1.1131261 0.60122989 0.84689775 0.25994 1.14637 0.89546 0.54142
0.74446007 0.21330113 1.27492433 0.56978811 0.70867152 0.79953 0.61867 0.19091 1.50776
1.4273433 0.338013729 1.16055087 0.25657512 1.2179591 0.51728 0.87996 0.21866 1.43347
0.78090069 0.015471572 2.59612745 0.150297288 0.9690941 0.86678 0.59754 0.0531 1.91763
0.82045144 0.46572602 1.47489353 0.04569 2.5293 0.0315 2.66249
0.78236983 0.4605294 1.12074811 0.14783 2.66223 0.83447 0.34595
1.27079616 0.485563421 1.00719393 0.83777299 0.60524665 0.52115 0.85312 0.39508 1.02619
1.1520131 0.61334604 0.9380665 0.3822371 0.9783224 0.5294 0.81568 0.49423 0.81565
0.98533525 0.993583268 0.48205096 0.99167896 0.34402762 0.95799 0.52083 0.77787 0.6668
0.29243864 1.29314251 0.30669 1.13363 0.80818 1.62665
0.426105652 1.83065668 0.34977 1.12015 0.22436 1.79188
0.406769001 1.30063072 0.6101709 0.56549363 0.27786 1.62482 0.38435 1.1722
0.65206783 0.252948143 1.09483835 0.24449186 1.13449839 0.28066 1.36638 0.36248 1.05274
0.98132795 0.053225028 1.40637947 0.18330772 1.2477347 0.05071 1.91724 0.15245 1.41099
1.45362169 0.613867837 0.9872088 0.37630154 0.98682924 0.55346 0.86712 0.32015 1.95243
0.49722995 0.386026926 2.51680998 0.00553 2.54796 0.47798 0.82393
0.82657162 0.28728539 1.30546112 0.28728539 1.30546112 0.50438 0.8762 0.31251 1.30654
0.84430853 0.32040491 1.16718273 0.74025 0.73757 0.17324 1.57127
0.25579492 0.484923294 0.113281862 1.2327031 0.21123 4.84923
0.886439 0.113281862 1.2327031 0.22381912 1.13675111 0.57134 0.89965 0.02231 1.79378
0.87000214 0.907771926 0.64527648 0.78112408 0.71438268 0.52826 0.92542 0.92109 0.55962

|            |             |            |            |            |         |         |         |         |
|------------|-------------|------------|------------|------------|---------|---------|---------|---------|
| 1.16957702 | 0.207328719 | 2.11062999 | 0.63800074 | 0.67233818 | 0.06483 | 5.32946 | 0.25228 | 5.92674 |
| 0.75039225 | 0.211412033 | 1.22664741 | 0.08721342 | 1.79792817 |         |         | 0.35887 | 1.08995 |
|            | 0.553354896 | 0.97645135 | 0.42961733 | 0.94795486 | 0.88955 | 0.60609 | 0.18049 | 1.32937 |
|            | 0.590698048 | 0.94604938 |            |            |         |         | 0.4067  | 0.94605 |
| 0.64535674 | 0.389487448 | 1.23829741 |            |            | 0.45212 | 0.93543 | 0.15446 | 2.34065 |
| 1.1829491  | 0.186886293 | 1.3614221  |            |            | 0.12702 | 2.21514 | 0.36173 | 1.15443 |
| 2.54063745 | 0.192181628 | 1.17098673 | 0.29169488 | 1.11023218 | 0.34487 | 1.12377 | 0.11299 | 1.70331 |
| 1.49810358 | 0.292737448 | 1.09791081 | 0.61576616 | 0.81291162 | 0.34543 | 1.07605 | 0.24605 | 1.16479 |
| 0.91991956 | 0.594343761 | 0.97518056 | 0.83348153 | 0.66640123 | 0.40917 | 1.02562 | 0.81171 | 0.68872 |
| 1.13485811 | 0.679757839 | 0.87964067 | 0.71871456 | 0.65799962 | 0.4208  | 0.95081 | 0.52735 | 0.78258 |
| 0.63634924 | 0.614529464 | 0.98241036 | 0.37769324 | 0.98210325 | 0.71582 | 0.6377  | 0.33303 | 1.28783 |
|            | 0.395447741 | 1.07622773 | 0.42839387 | 0.89659897 | 0.39287 | 1.07328 | 0.34016 | 1.21845 |
|            | 0.850087551 | 0.5196949  | 0.88146292 | 0.5196949  |         |         |         |         |
| 0.80111564 | 0.251265757 | 1.26452948 |            |            | 0.51122 | 0.80003 | 0.28037 | 1.26404 |
| 1.18831785 | 0.41979503  | 1.26718007 | 0.55258658 | 0.69658798 | 0.47043 | 0.85756 | 0.34246 | 1.52213 |
|            | 0.174402577 | 1.63109001 | 0.50523382 | 0.87233566 | 0.49296 | 0.8195  | 0.12845 | 1.63452 |
|            | 0.596751118 | 0.87214978 | 0.58886888 | 0.56118786 |         |         | 0.41604 | 0.88992 |
|            | 0.314888927 | 2.64245186 | 0.49759324 | 0.75118918 |         |         | 0.27485 | 2.64637 |
| 0.95919629 | 0.577909944 | 0.98514798 | 0.38132686 | 0.97720644 | 0.34936 | 1.99605 | 0.23922 | 1.56046 |
| 0.38247415 | 0.160406253 | 1.25744507 | 0.25036904 | 1.17771758 | 0.30687 | 1.21084 | 0.12126 | 1.89154 |
|            | 0.225388443 | 1.16574684 | 0.17970002 | 1.16574684 |         |         | 0.93125 | 0.39536 |
|            | 0.902379307 | 0.39536267 |            |            |         |         |         |         |
| 1.0791171  | 0.466510175 | 1.13455289 |            |            | 0.38289 | 1.09316 | 0.25519 | 2.44858 |
